# Supplementary material
Source: publisher figshare collection journal article supplement (https://tandf.figshare.com/articles/dataset/_/20431288)

# Attachment 1

## Studied sections

Area 1  
Subarea 1.1.  
Reshetnikova R.

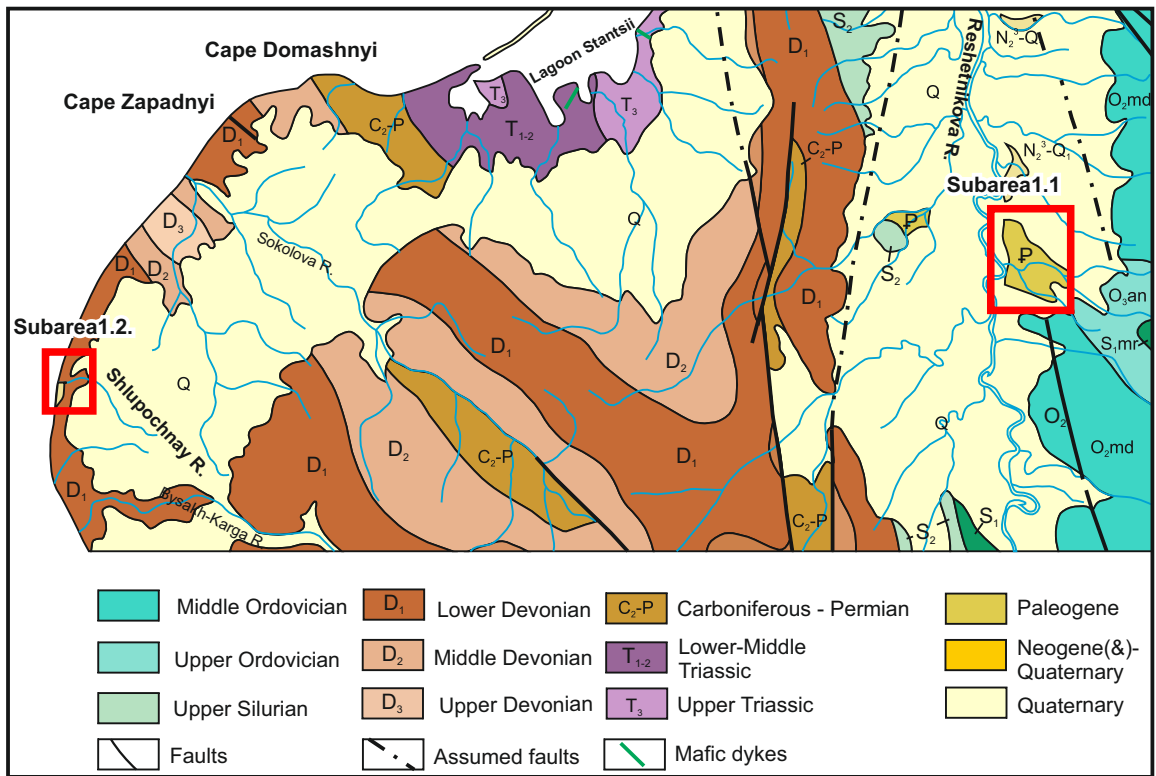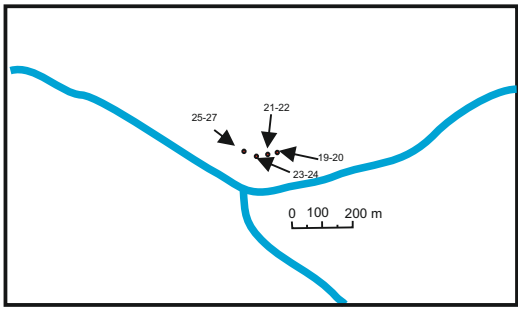

W

E

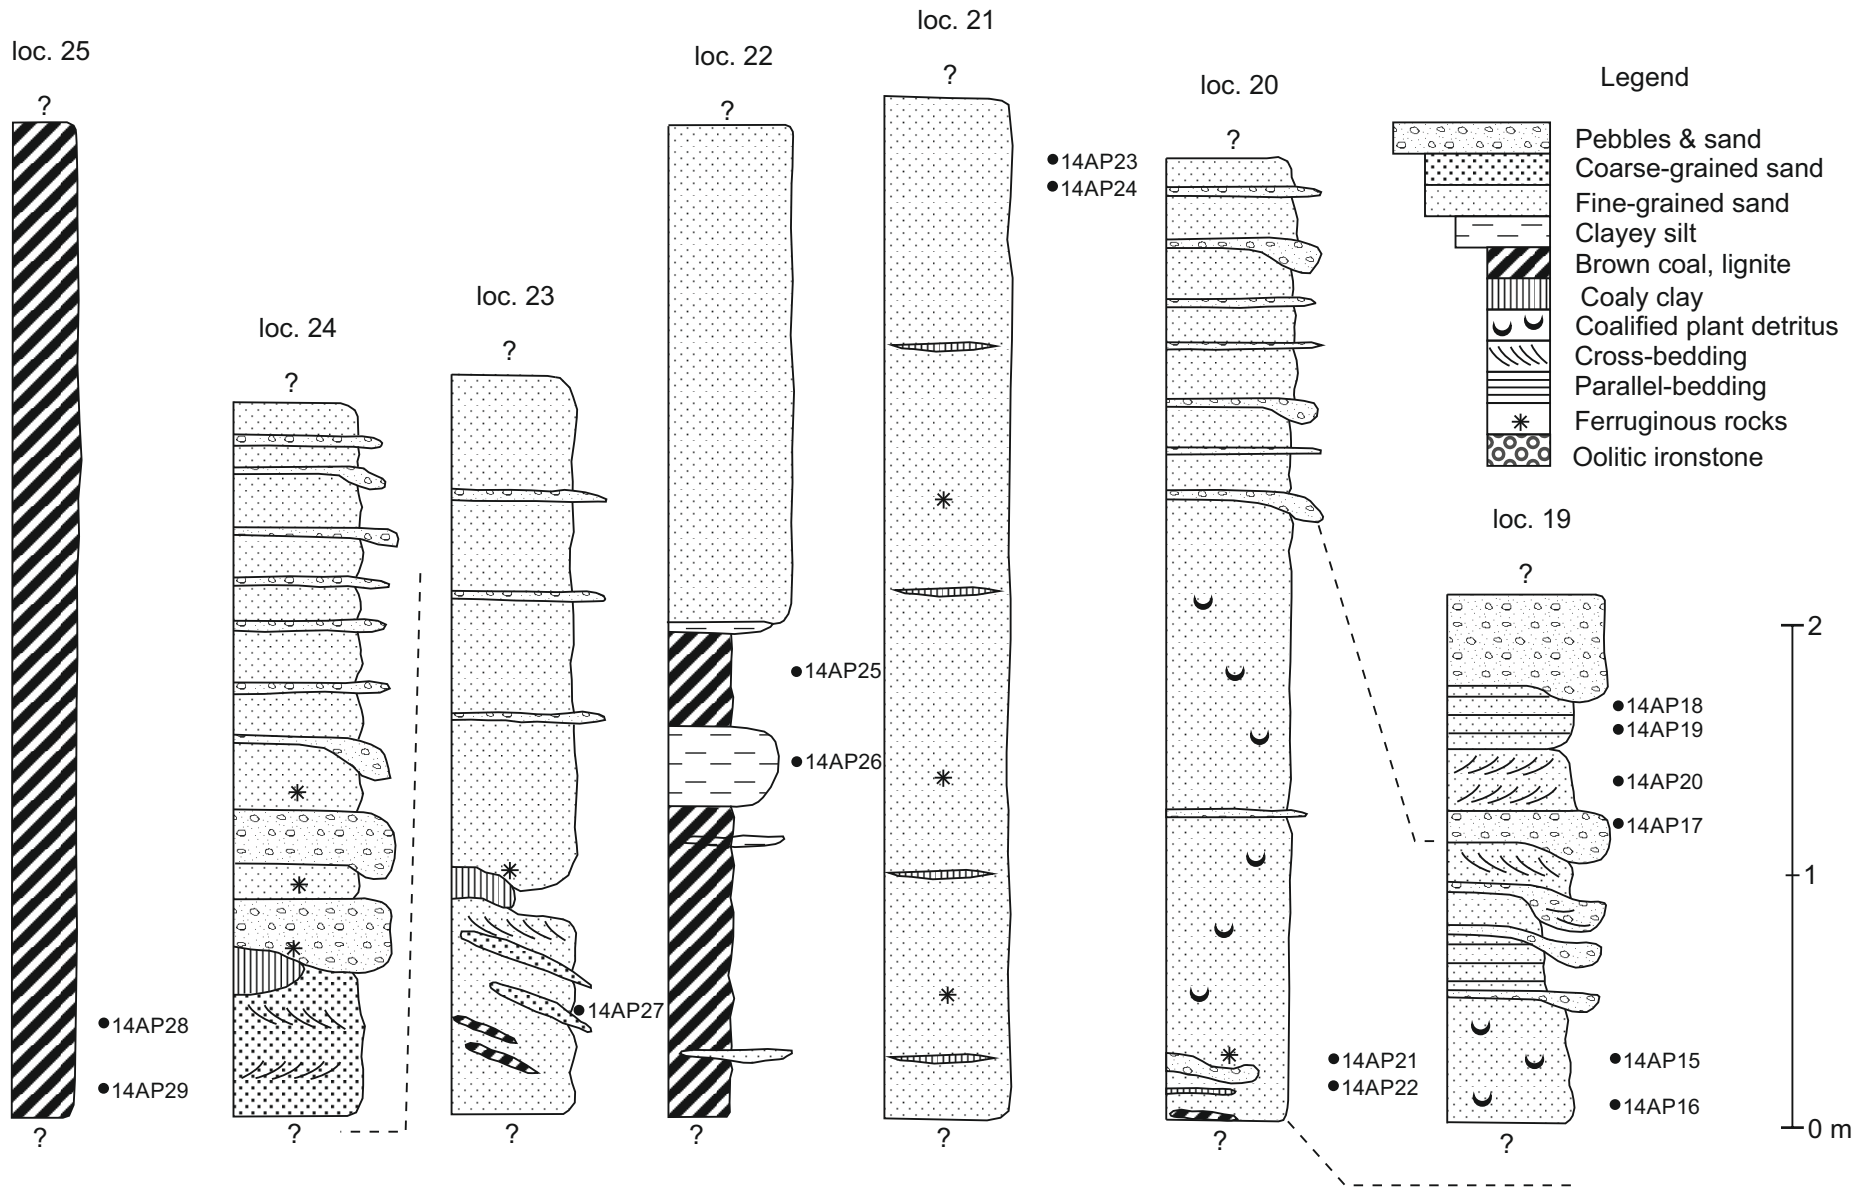

# Area 1

## Subarea 1.1.

### Reshetnikova R.

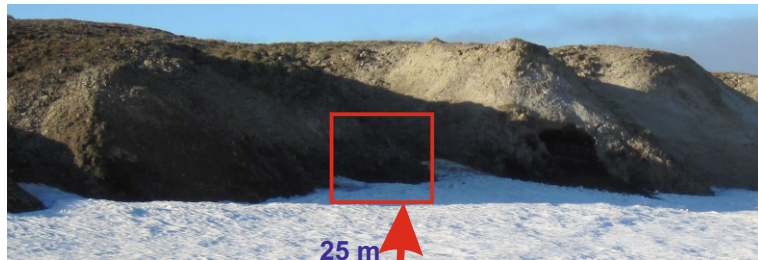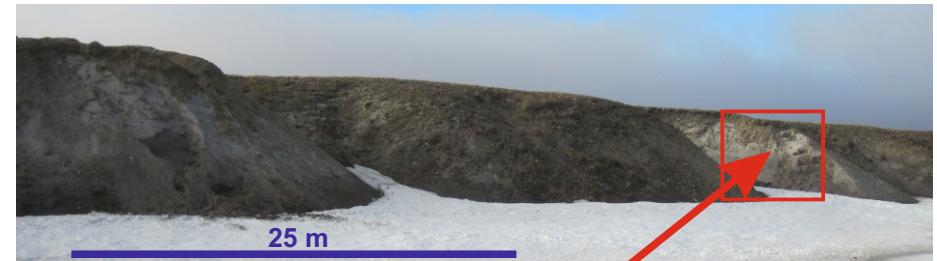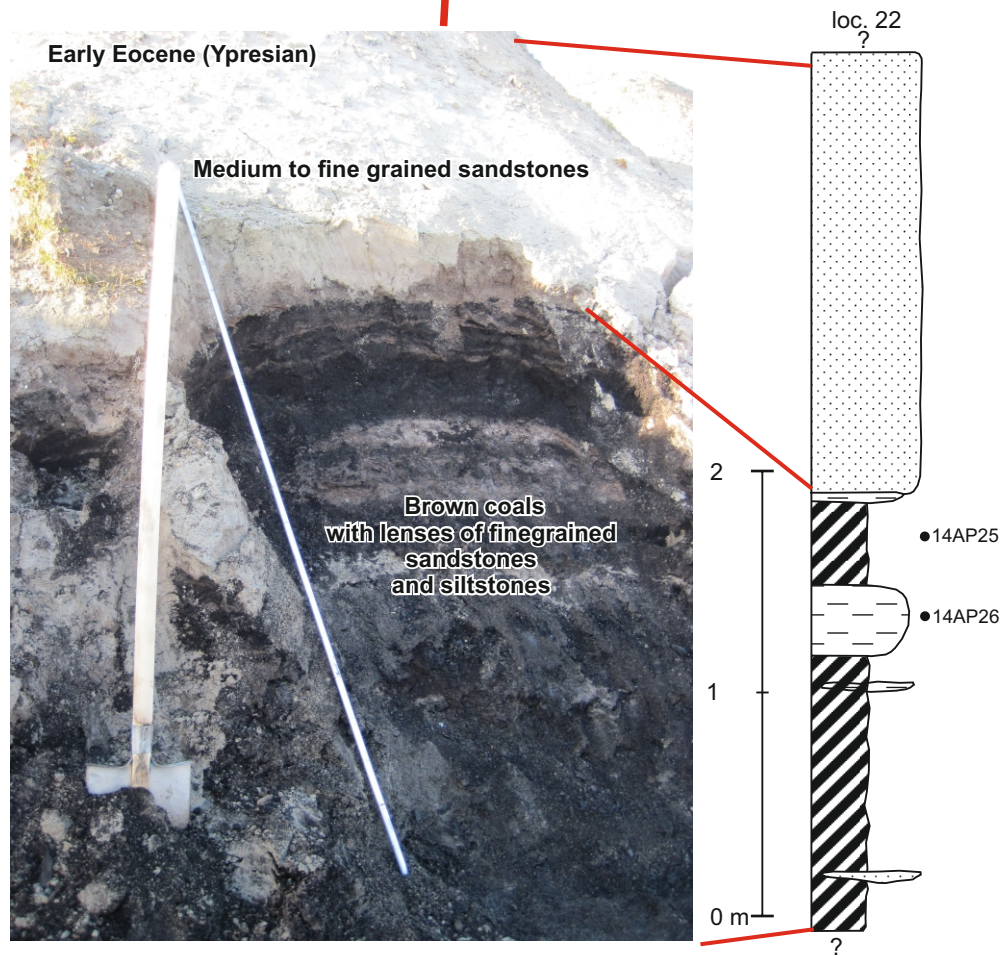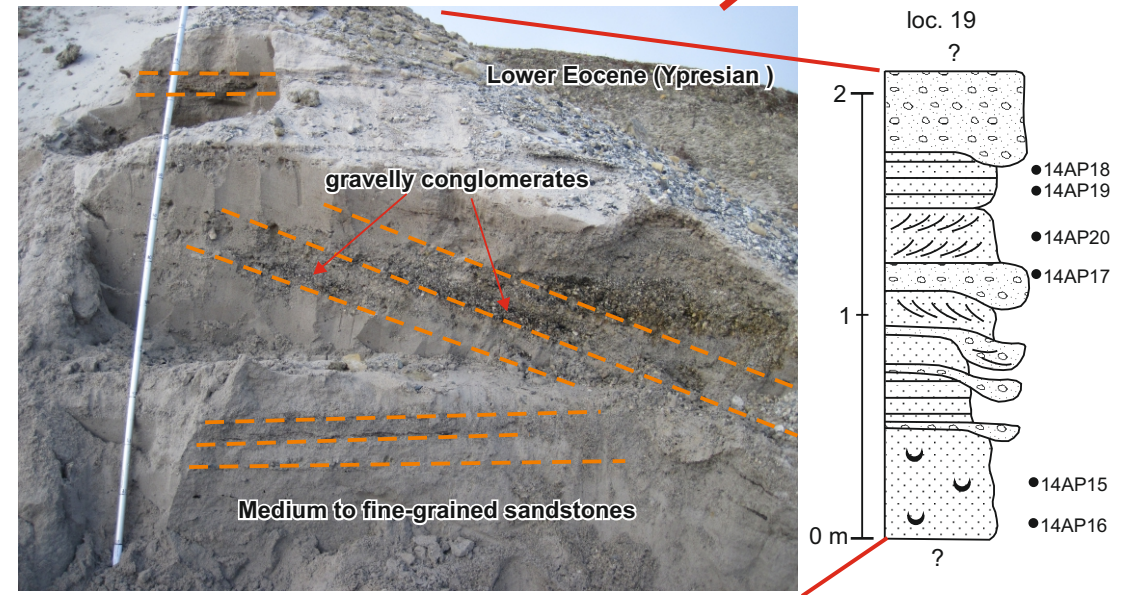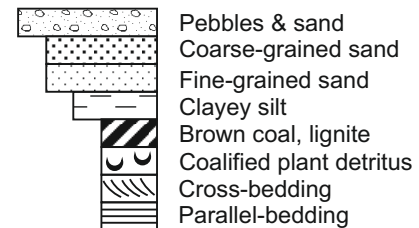



Subarea 1.2.  
Shlupochnaya River

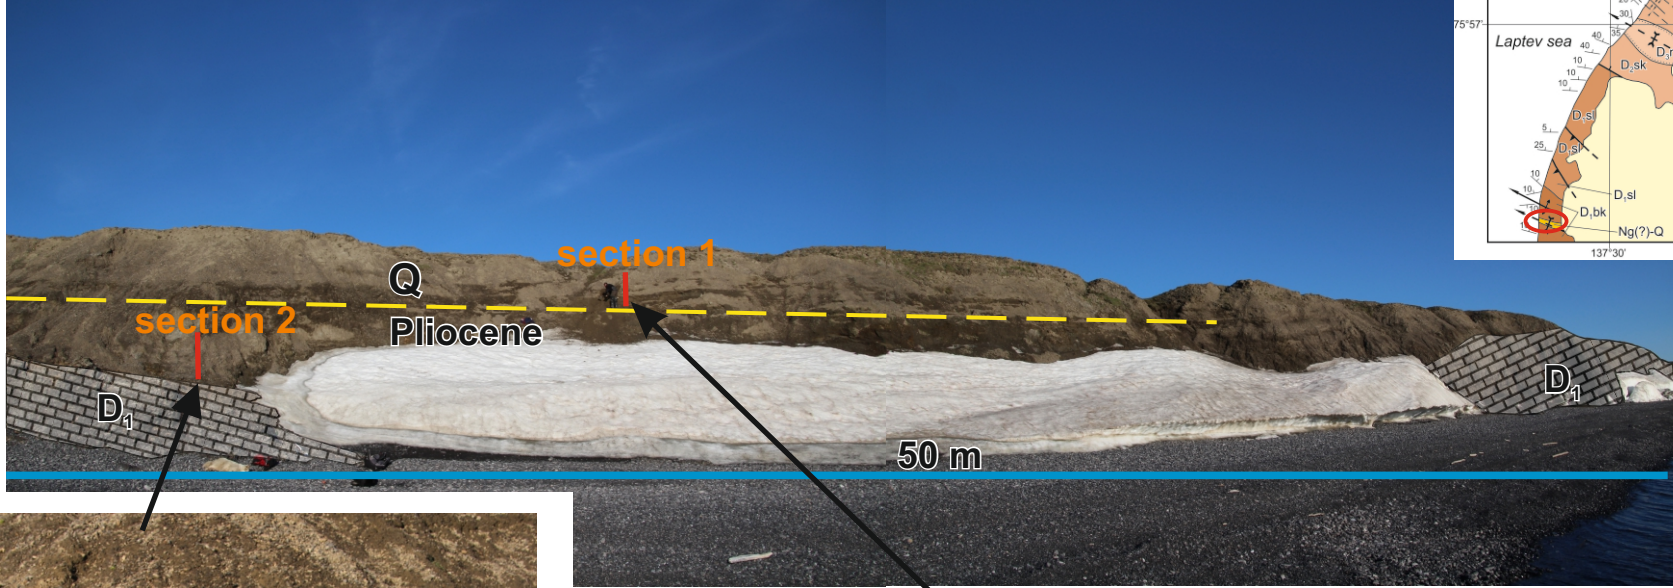

- Legend
- Pebbles & sand
  - Coarse-grained sand
  - Fine-grained sand
  - Clayey silt
  - Carbonate pebbles
  - Caroline limestone
  - Mammoth bones
  - Flora

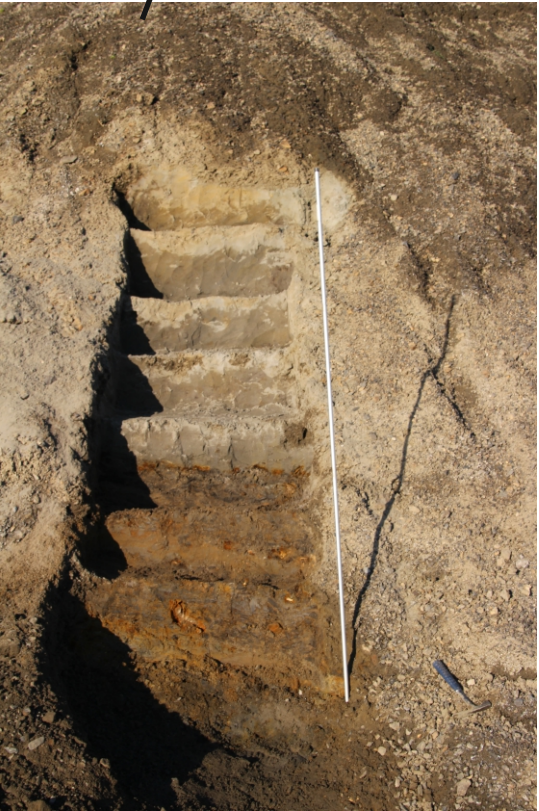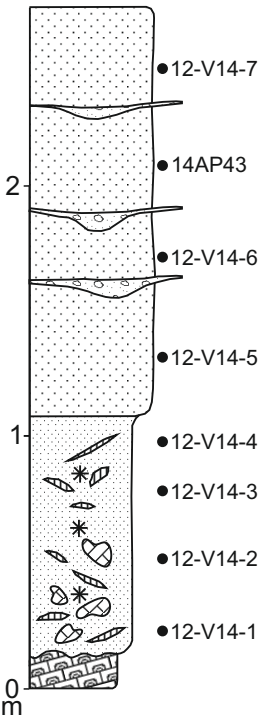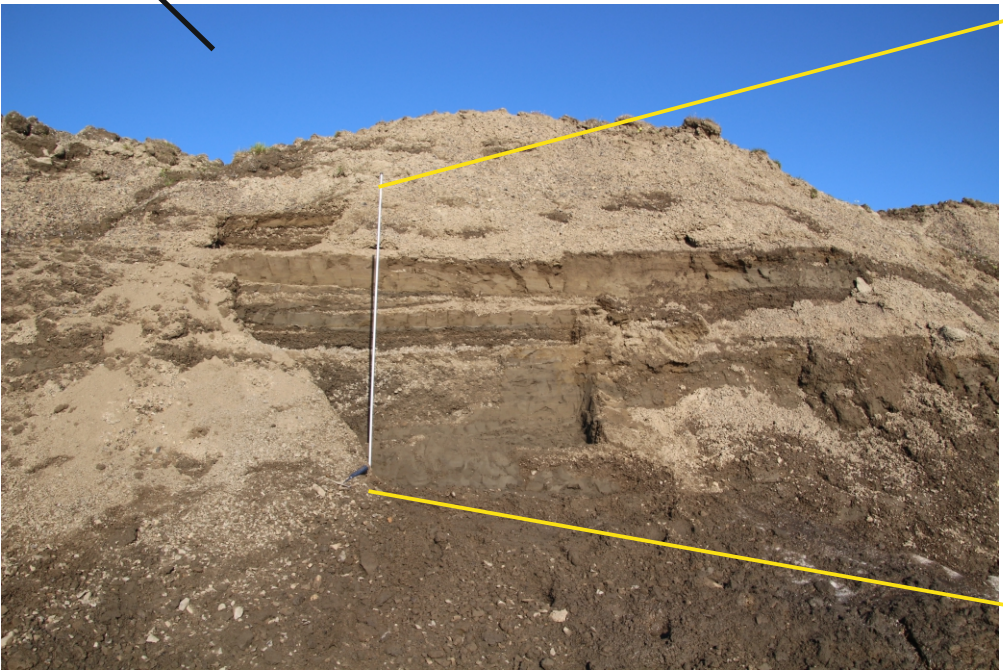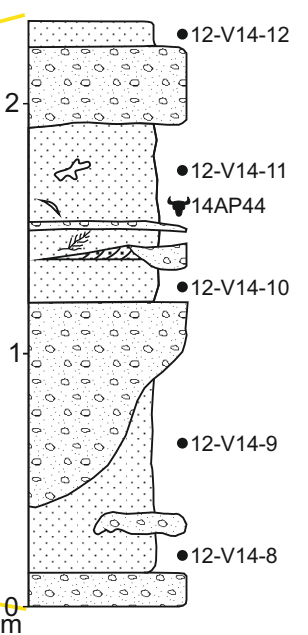



# Area 2

## Subarea 2.1.

### Tas Ary Island , northern section

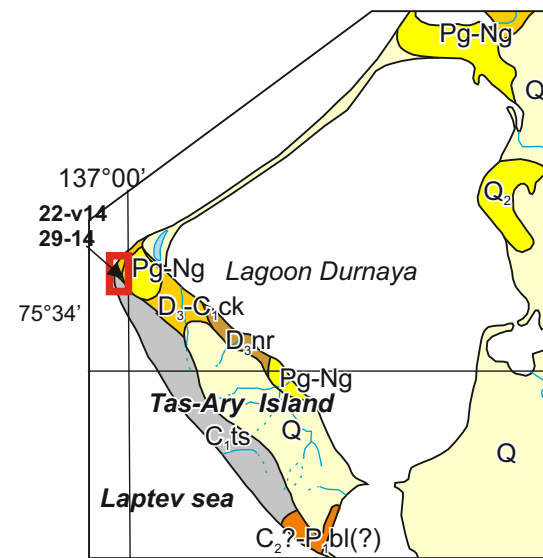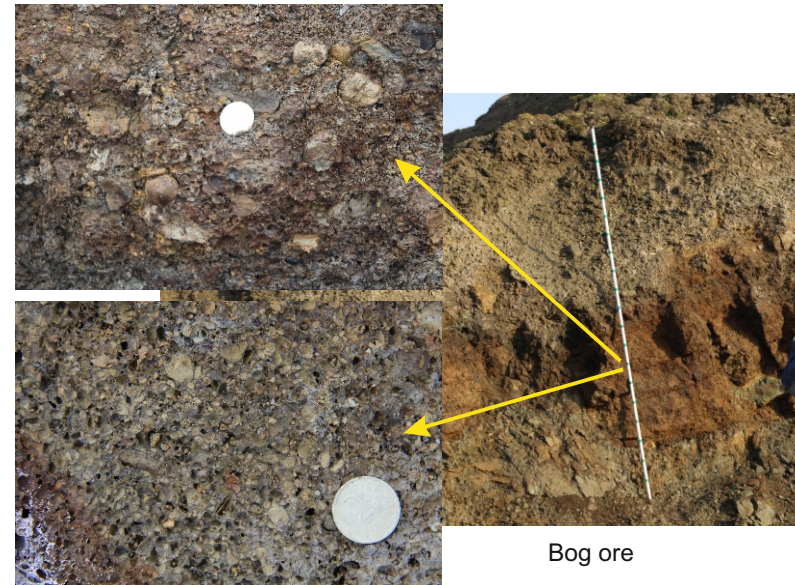

Bog ore

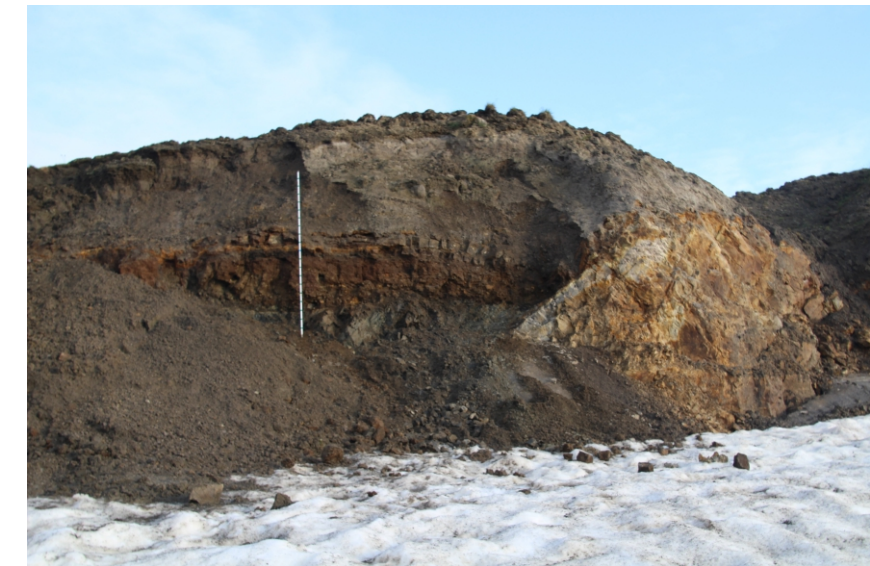

Section 22-v14/2

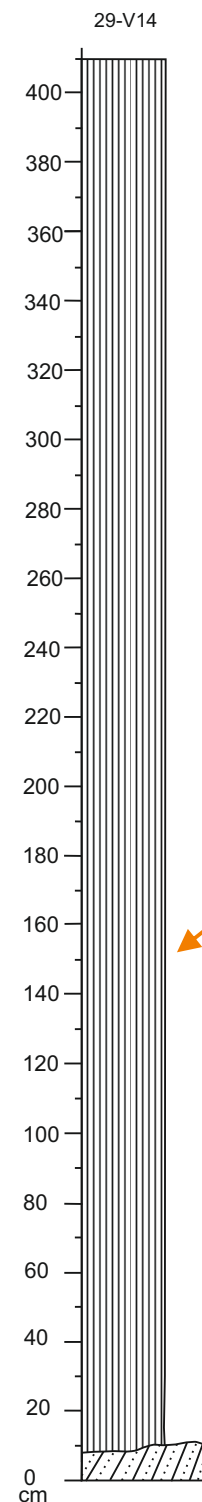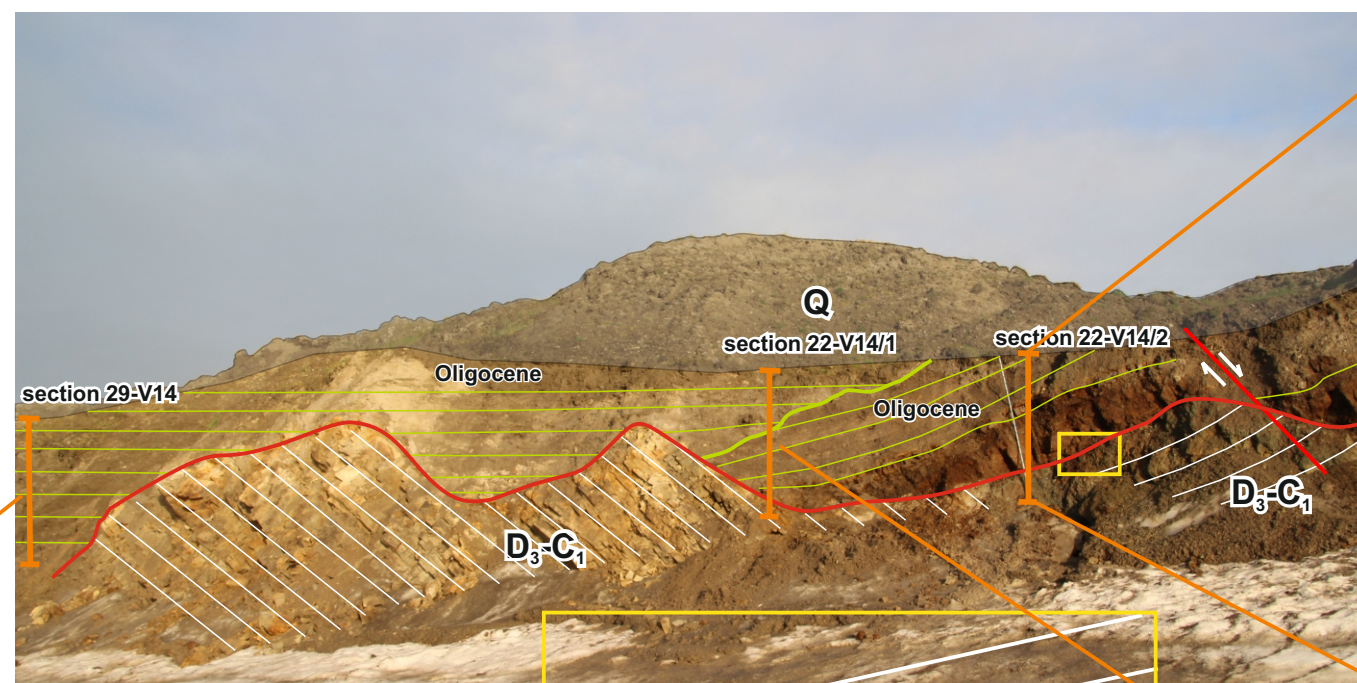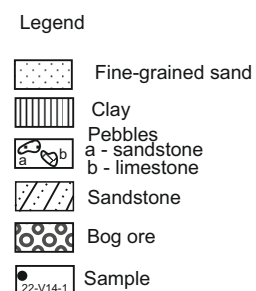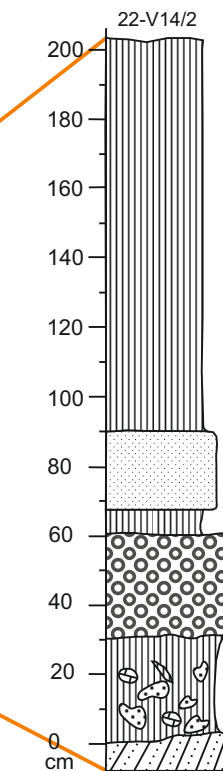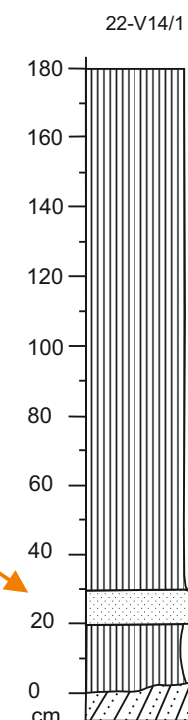



# Area 2

## Subarea 2.1.

### Tas Ary Island , southern sections

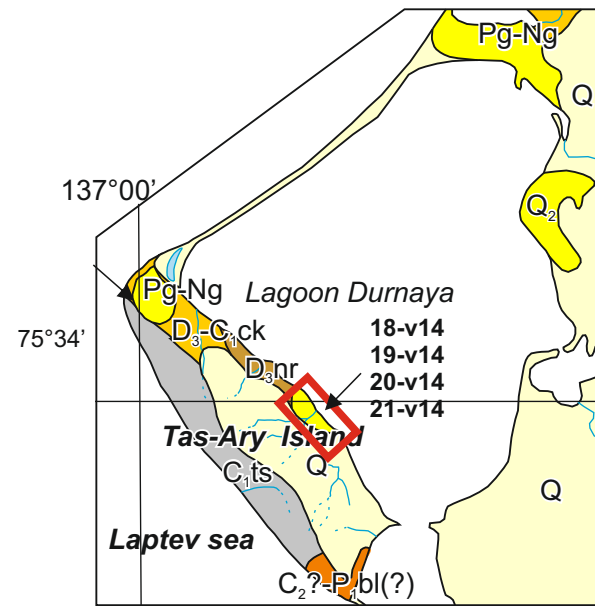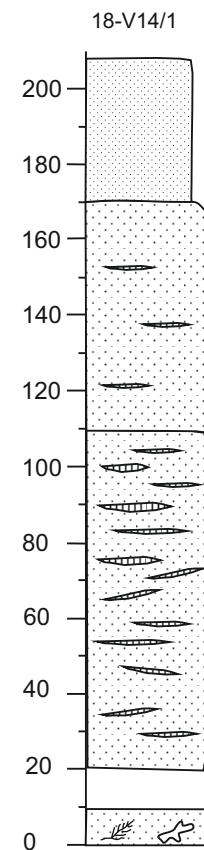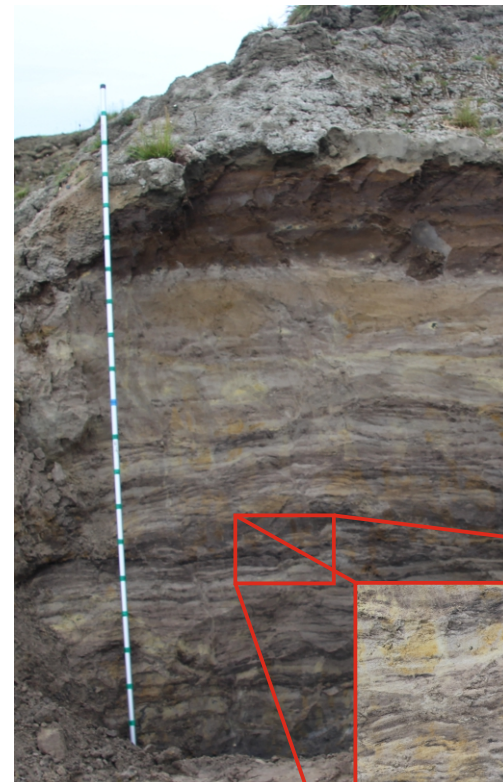

20-V14/1

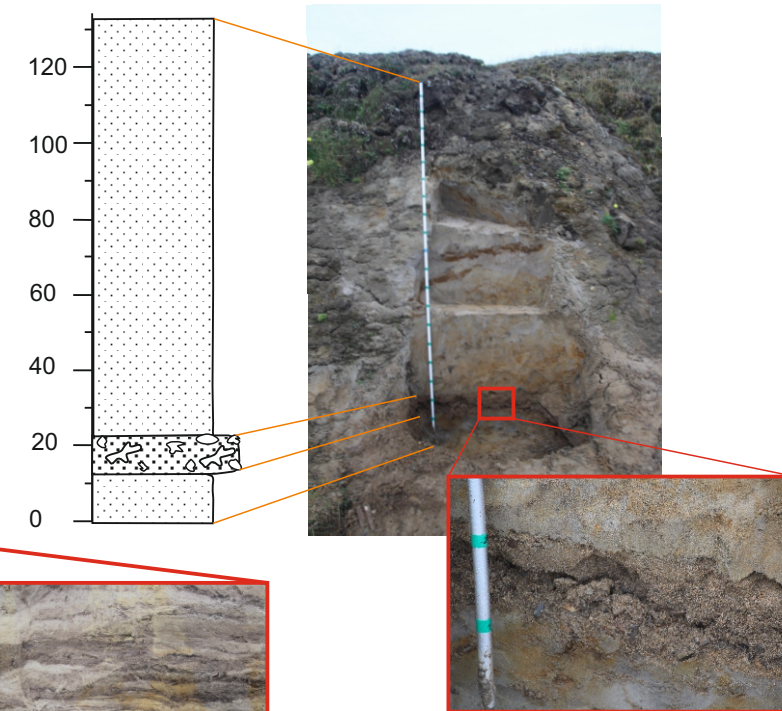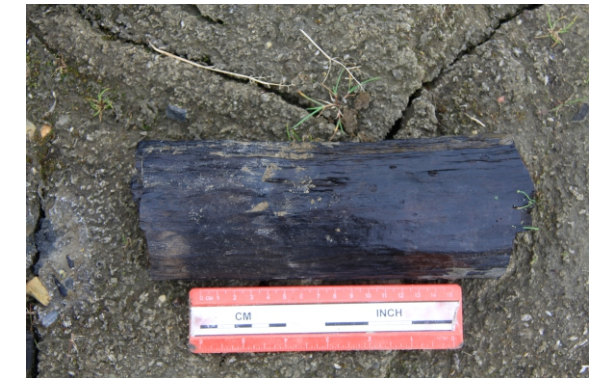

Fossiliferous wood

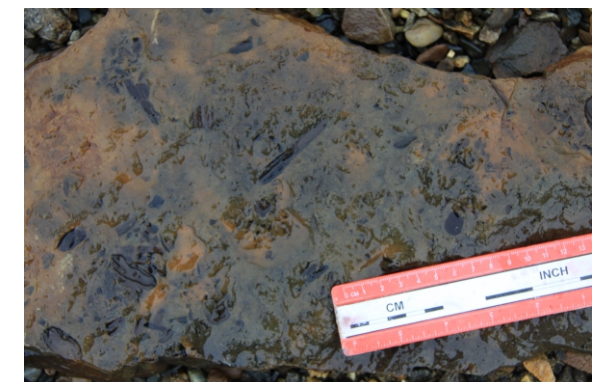

Sandstone with pebbles and coalified woods' fragments

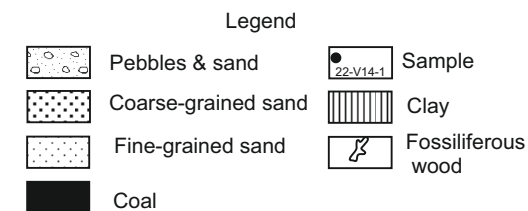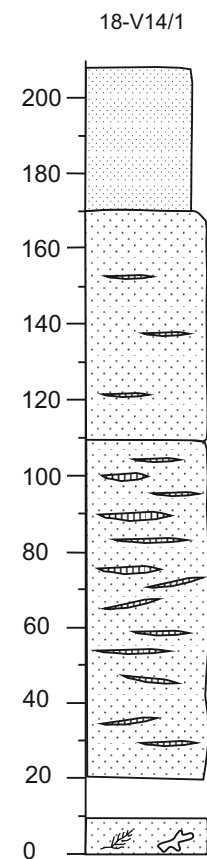

- 18-V14-8
- 18-V14-7
- 18-V14-6
- 14AP56
- 18-V14-5
- 18-V14-3
- 18-V14-4
- 18-V14-1
- 18-V14-1

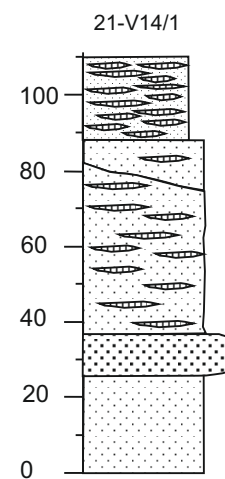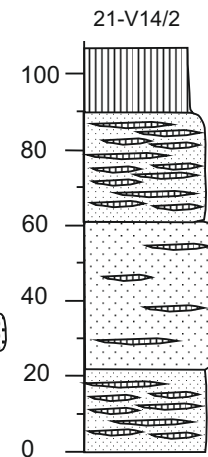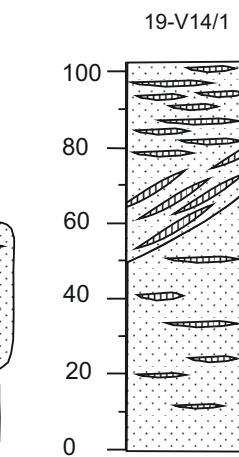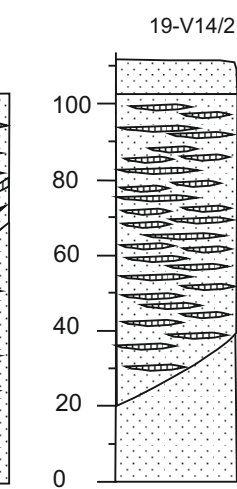

- 19-V14-5
- 19-V14-4
- 19-V14-3
- 19-V14-2
- 19-V14-1

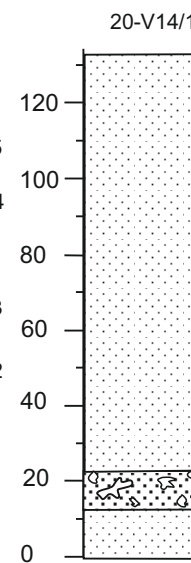

- 20-V14-5
- 20-V14-4
- 14AP59
- 20-V14-3
- 20-V14-2
- 20-V14-1

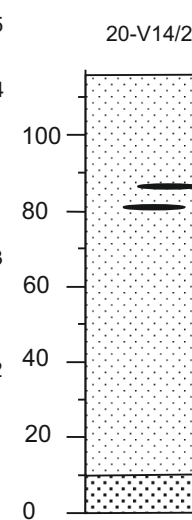

- 20-V14-7
- 20-V14-6

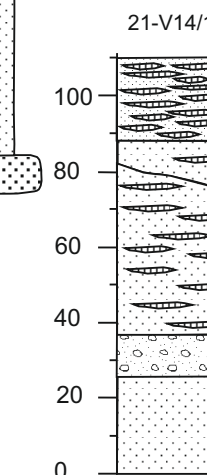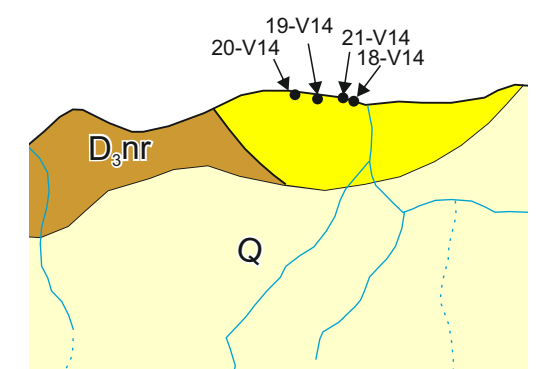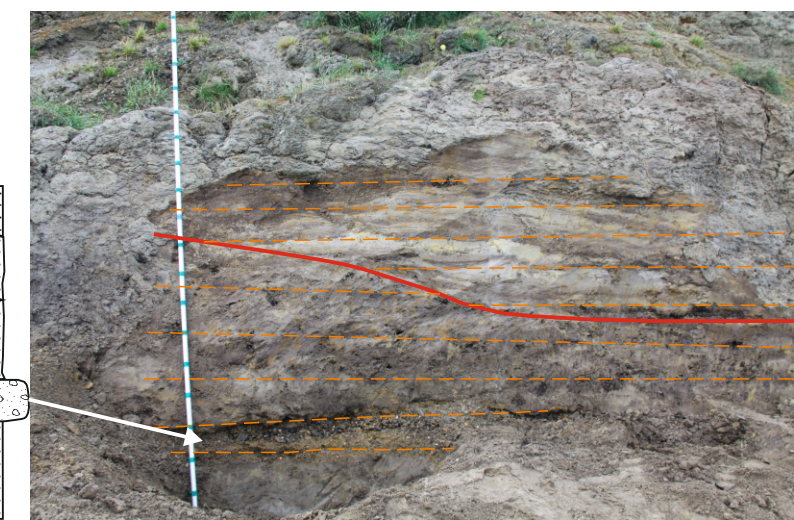



# Area 2

## Subarea 2.2.

### Durnaya Lagoon

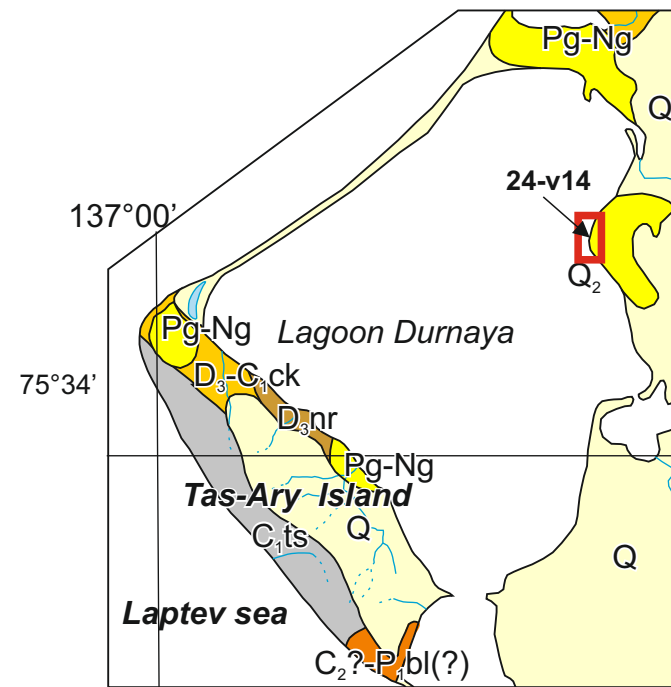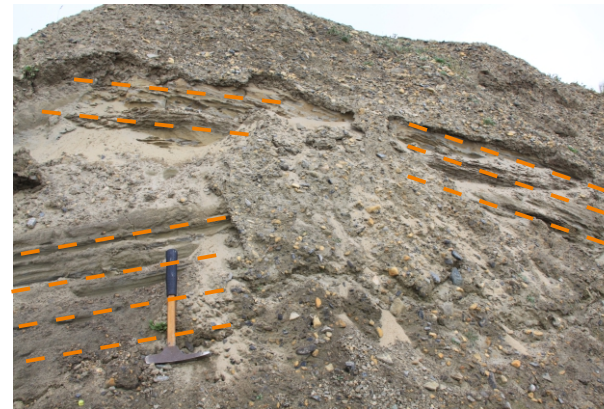

Sands filling in channel

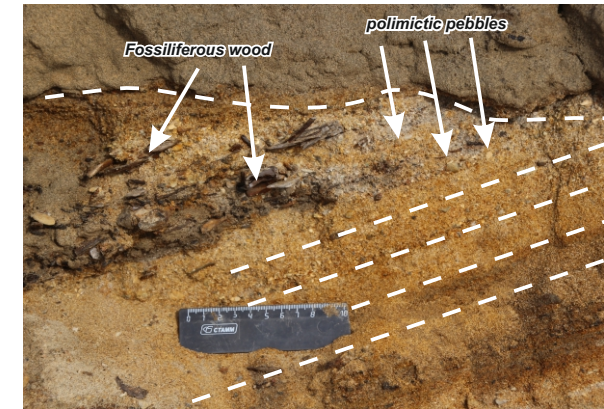

Coarse-grained sands with fragments of fossiliferous wood and pebbles

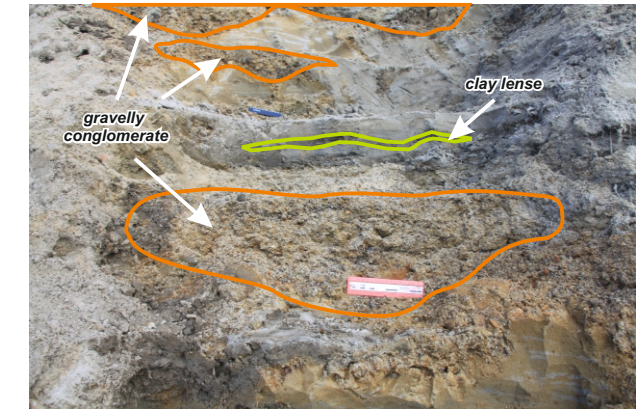

sands with lenses of gravelly to pebbly conglomerates and clay

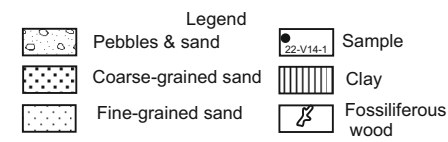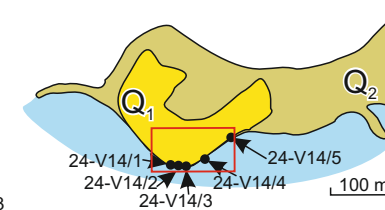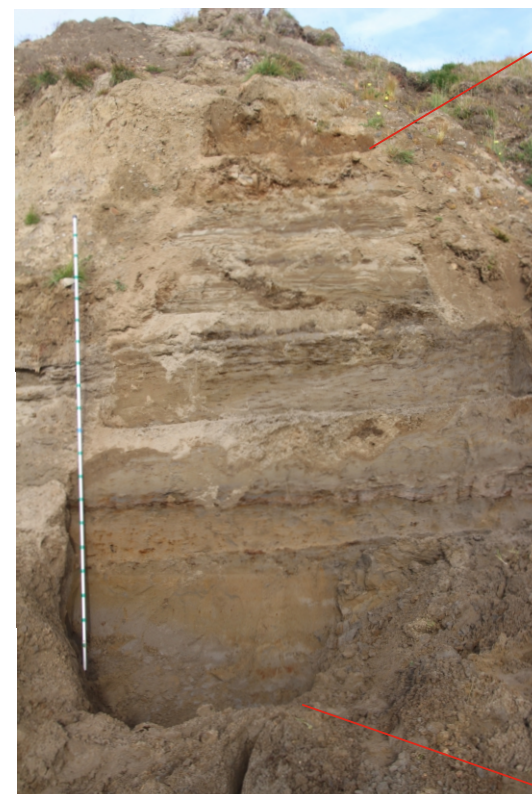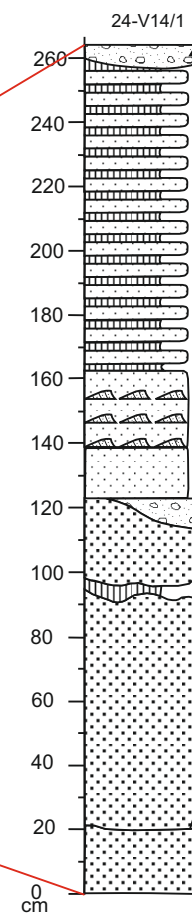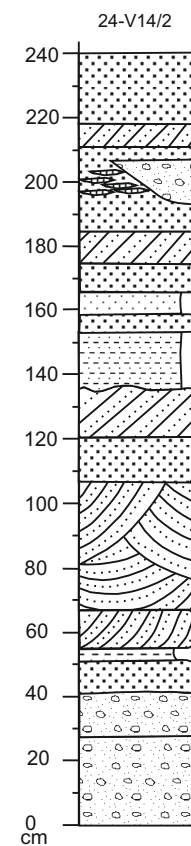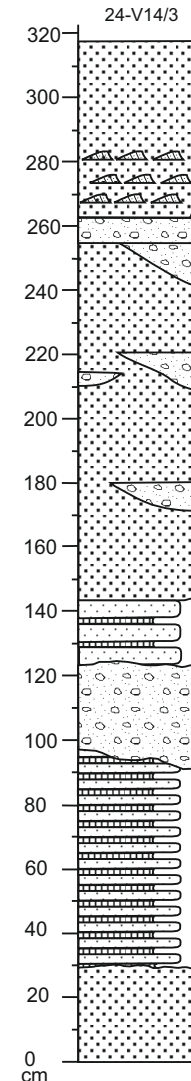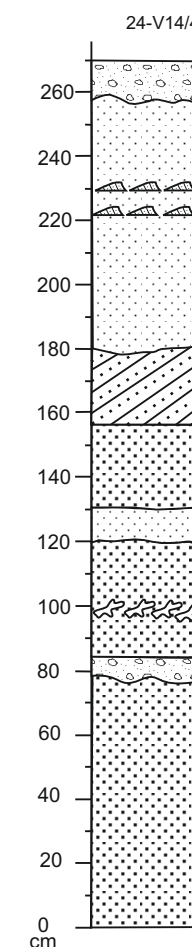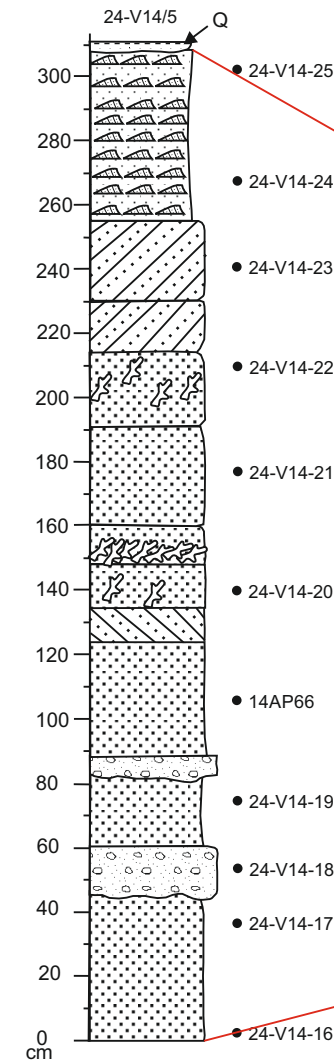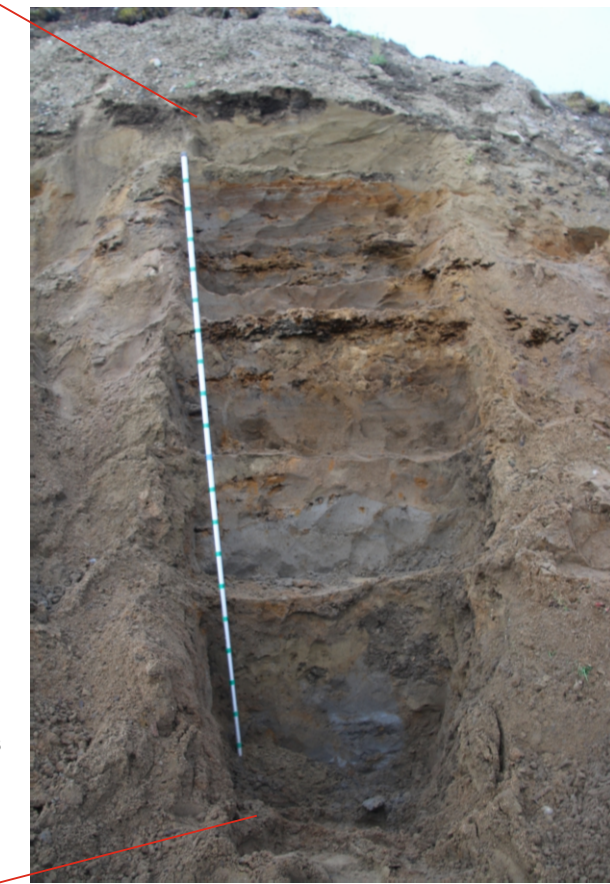

Supplement: Supplementary file 2 [file 1]
