# Supplementary material
Source: publisher figshare collection journal article supplement (https://tandf.figshare.com/articles/dataset/_/20431288)
Supplement: Supplementary file 1 [file 1]

## **Attachment 2. Palynological analysis**

Chemical processing and palynological study were carried out for 29 samples. Distribution of taxa and their age were established; additionally, paleo-ecological data were obtained.

### **1. Methods of palynological research**

Palynological analysis is a time-consuming method, which requires chemical treatment of the samples and microscopic study of the resulting macerate. Standard methods of processing of palynological samples, adopted in the laboratory of paleo floristry of GIN RAS, were used.

- 1) Samples were treated with 10% HCl to remove carbonates;
- 2) Samples were washed in distilled water up to neutral reaction;
- 3) Samples were treated with 5% Na<sub>2</sub>HPO<sub>4</sub> (aqueous) for separating the precipitate from the clay particles;
- 4) The resultant precipitate was centrifuged in a solution of heavy liquid [K<sub>2</sub>(CdI<sub>4</sub>)] for fossil palynomorphs extracting;
- 5) The resulting organic macerate was washed from heavy liquid;
- 6) The resulting macerate was treated by concentrated hydrofluoric acid to remove the siliceous minerals.
- 7) The resulting organic macerate was washed in distilled water to neutral reaction
- 8) Collecting of the resulting macerate in tubes (kept in glycerol).

A drop of resulting macerate was placed on a glass slide in a mixture of glycerin-gelatin and covered with a cover glass to study fossil palynomorphs.

Palynological study was carried out with optical microscope Axiostar plus (Carl Zeiss), at operating magnification  $\times 400$  and  $\times 600$ .

All available types of spores and pollen, especially markers were determined in samples. Minimum quantitative value counted in the sample - 200 copies. In a case of a small number of palynomorphs all encountered instances were counted.

The stratigraphic distributions of spores, pollen and dinocysts are given in Tables 1-3. Pictures of specific taxa are shown in Tables 6-8

## 2. Palynological analysis

### *Area 1.*

#### *Subarea 1.1.*

*Reshetnikova River*

*Location No 14AP.*

Samples 14AP-16, 14AP-20, 14AP-22 (Table 1). Among the group of higher plants palynomorphs a pollen of gymnosperms are predominant; less abundant are angiosperm pollen and spores. In the lower part of the section Taxodiaceae-Cupressaceae dominates among gymnosperms pollen, which replaced in 14AP-22 by pine pollen. Angiosperms are not diverse and represented by *Tricolporopollenites cingulum*, *Tricolporopollenites* spp., *Pistillipollenites mcgregorii*, and pollen which moving closer to modern Betulaceae, *Alnipollenites* sp., *Carya simplex*, *Platycarya* sp., *Pterocarya* sp., *Juglans* sp., *Liquidambar grandiporea*, *Ulmodeipites tricostatus*, *Myrica* sp., Araliaceae, Hamamelidaceae. Spores also vary and only in 14AP-20 achieve significant qualities, mainly due to the presence of spores of ferns.

Spectrum of 14AP-26 sample is dominated by pollen of angiosperms, which represented by thermophilic taxa pointing to a warm and humid climate, close to subtropical, during the sedimentation.

Palynological spectra of samples 14AP-16, 14AP-20, 14AP-22, 14AP-26 can be compared with the spectra of Kengdey and Tastastah palynocomplexes of regional horizons (Grinenko et al., 1998) pointing to the Early Eocene age of sediments.

The presence of cysts of dinoflagellates (dinocysts) and marine acritarch *Paralecaniella indentata* was established in the samples 14AP-16, 14AP-20 and 14AP-22 claims that the sediments were formed in coastal marine paleoenvironment. The nature of the distribution of marine phytoplankton indicates the regressive phase of basin development with only freshwater algae are present in 14AP-26 samples indicating the lake depositional environments.

Complex of dinocysts (sample 14AP16) is mainly represented by taxa having wide spread in the Paleogene and only some of them have narrow stratigraphic distribution. The first appearance of the *Wetzeliiella articulata*, *Wetzeliiella* cf. *samlandica* and *Cerebrocysta bartonensis*, which were found in the samples, is reported from West Siberia and Europe not earlier than Ypresian (Luterbacher et al., 2004; Iakovleva, Heilmann-Clausen, 2010; Yakovleva et al., 2012; Yakovleva and Alexandrova, 2013). Thus, the first appearance of these taxa in West Siberia basin is confined to the *Dracodinium varielongitudum* (Yakovleva and Alexandrova, 2013) zone of the middle of Ypresian. Based on the absence of younger dinocyst taxa the age of the basal layers of the 14AP section can be as a Middle Ypresian.

**Table 1. Distribution of palynomorphs in section 14AP.**

| <i>Sample</i>                       | 14AP         |           |            |            |
|-------------------------------------|--------------|-----------|------------|------------|
| <i>No</i>                           | 26           | 22        | 20         | 16         |
| <i>Age</i>                          | Early Eocene |           |            |            |
| <u><i>Pollen of gymnosperms</i></u> |              |           |            |            |
| Taxodiaceae-Cupressaceae            | 67           | 9         | 81         | 85         |
| Abies sp.                           |              |           |            | 1          |
| Picea sp.                           |              |           | 1          |            |
| Cedrus sp.                          |              | 1         | 2          |            |
| Pinus subgen. Haploxylon            | 3            | 9         | 10         | 7          |
| Pinus subgen. Diploxylon            |              | 2         | 8          | 1          |
| Pinus sp.                           |              | 12        | 24         |            |
| Pinaceae                            | 2            | 24        | 44         | 23         |
| Podocarpus sp.                      | 2            | 2         | 1          | 2          |
| Araucariacidites sp.                |              | 1         |            | 3          |
| Sciadopitys sp.                     | 1            |           | 2          | 1          |
| <b>sum</b>                          | <b>75</b>    | <b>60</b> | <b>173</b> | <b>123</b> |

|                                                           |            |          |           |           |
|-----------------------------------------------------------|------------|----------|-----------|-----------|
| <b><u>Pollen of angiosperm</u></b>                        |            |          |           |           |
| Tricolporopollenites cingulum                             |            |          |           | 2         |
| Tricolporopollenites spp.                                 | 1          |          |           | 5         |
| Pistillipollenites mcgregorii                             | 3          |          |           | 1         |
| Betulaceae                                                |            |          |           | 5         |
| Alnipollenites sp.                                        | 5          |          |           | 1         |
| Carya simplex                                             | 32         | 4        |           | 4         |
| Platycarya sp.                                            | 3          | 1        |           | 1         |
| Juglans sp.                                               | 5          | 2        |           | 1         |
| Ulmodeipites tricostatus                                  | 3          |          |           | 2         |
| Myrica sp.                                                |            |          |           | 1         |
| Araliaceae                                                |            |          |           | 1         |
| Pterocarya sp.                                            | 1          |          | 1         |           |
| Hamamelidaceae                                            |            |          | 1         |           |
| Liquidambar grandiporea                                   |            | 1        |           |           |
| <del>Betula sect. Albae древ.</del>                       |            |          |           |           |
| <del>aff. Betula sect. Nanae</del>                        |            |          |           |           |
| Nyssa sp.                                                 | 1          |          |           |           |
| Engelhardtia sp.                                          | 1          |          |           |           |
| Hamamelis sp.                                             | 6          |          |           |           |
| Quercus sp.                                               | 5          |          |           |           |
| Comptonia sp.                                             | 11         |          |           |           |
| Tricolpites sp.                                           | 3          |          |           |           |
| Triporopollenites sp.                                     | 1          |          |           |           |
| Triatriopollenites plicoides                              | 5          |          |           |           |
| Tricolporopollenites eschweilerei                         | 2          |          |           |           |
| Retitricolpites sp.                                       | 4          |          |           |           |
| <b>sum</b>                                                | <b>92</b>  | <b>7</b> | <b>2</b>  | <b>24</b> |
| <b><u>Spores of mosses and ferns</u></b>                  |            |          |           |           |
| Laevigatosporites sp.                                     | 87         | 2        | 19        | 1         |
| Osmunda sp.                                               | 16         |          | 3         | 3         |
| Salviniaceae                                              |            | 1        | 8         |           |
| Gleicheniaceae                                            |            | 1        | 1         |           |
| Lycopodium sp.                                            | 1          | 1        | 3         |           |
| <b>sum</b>                                                | <b>104</b> | <b>5</b> | <b>34</b> | <b>4</b>  |
| <b><u>Dinocysts, acritarchs,<br/>freshwater algae</u></b> |            |          |           |           |
| Paralecaniella indentata                                  |            | 2        | 1         | 42        |
| Heteraulacacysta-Dinopterygium<br>group                   |            | 1        |           | 4         |
| Deflandrea cf. oebisfeldensis                             |            |          |           | 1         |
| Cyclopsiella elliptica                                    |            |          |           | 9         |
| Diphyes colligerum                                        |            |          |           | 1         |
| Phthanoperidinium sp.                                     |            |          |           | 15        |

|                                 |          |          |            |
|---------------------------------|----------|----------|------------|
| Fromea laevigata                |          |          | 1          |
| Hystriosphæridium tubiferum     |          |          | 1          |
| Spiniferites ramosus            |          |          | 2          |
| Spiniferites sp.                |          |          | 1          |
| Cribroperidinium tenuitabulatum |          |          | 1          |
| Senegalinium obscurum           |          |          | 2          |
| Wetzeliella articulata          |          |          | 2          |
| Wetzeliella cf. samlandica      |          |          | 1          |
| Areoligera coronata             |          |          | 1          |
| Areoligera senonensis           |          |          | 1          |
| Areoligera sp.                  |          |          | 1          |
| Cerebrocysta bartonensis        |          |          | 1          |
| Elytrocysta brevis              |          |          | 1          |
| Thalassiphora delicata          |          |          | 1          |
| Cordosphaeridium sp.            |          |          | 1          |
| Cerodinium striatum             |          |          | 1          |
| microforaminiferal linings      |          |          | 3          |
| Myrhystridium sp.               |          |          | 1          |
| acantomorph acritarch           |          |          | 5          |
| Ovoidites sp.                   | 1        |          |            |
| Sigmopollis sp.                 |          |          |            |
| Pterospermella sp.              |          |          |            |
| Schizosporis sp.                | 8        |          |            |
| <b>sum</b>                      | <b>9</b> | <b>1</b> | <b>100</b> |
| <i>Mesozoic palynomorphs</i>    |          |          |            |
| Baculatisporites sp.            |          |          | 2          |
| Foveosporites cenomanicus       |          | 1        | 1          |
| Cicatricosisporites tersus      |          |          |            |
| Perinopollenites elatoides      |          |          | 1          |
| Cerebropollenites sp.           |          |          | 1          |
| Vitreisporites pallidus         |          |          | 1          |
| Piceapollenites mesophyticus    |          | 1        | 1          |
| Piceapollenites sp.             |          |          |            |
| Abietaepollenites sp.           |          |          |            |
| Alisporites similis             |          |          |            |
| Alisporites equalis             |          |          |            |
| Alisporites rotundus            |          |          |            |
| Alisporites sp.                 |          |          |            |
| Podocarpidites multesimus       |          |          |            |
| Podocarpidites major            |          |          |            |
| Podocarpidites sp.              |          |          |            |
| Phyllocladidites sp.            | 2        |          |            |
| Pinuspollenites minimus         |          |          |            |
| Pinuspollenites sp.             |          |          |            |
| Pinus cf. aralica               |          | 3        |            |

|                            |   |   |   |   |
|----------------------------|---|---|---|---|
| Disaccites                 |   |   |   |   |
| Cedripites sp.             |   |   |   |   |
| Araucariacidites australis |   |   |   |   |
| Dipterella oblatinoides    |   |   |   |   |
| Gingkocycadophytus sp.     |   |   |   |   |
| Quercus sparsus            |   |   |   |   |
| Tripartina variabilis      | 1 |   |   |   |
| <b>sum</b>                 | 3 | 2 | 5 | 7 |

### ***Subarea 1.2.***

#### ***Incised valley near Shlupochnaya River***

Palynomorphs are unevenly distributed. Representative spectra were obtained only in samples 12V14-1 and 12V14-3 (Table 2). These spectra are characterized by the dominant role of angiosperm pollen, with less involvement of the pollen of gymnosperms. Among angiosperm pollen group dwarf birch and alder form are dominated, with subordinate amount of tree form, as well as sedge and heather. The few species of relatively thermophilic pollen was reported (Corylus, Carpinus, Elaeagnus, Lonicera). Pollen of gymnosperms consists mainly of coniferous pine; dark coniferous (Picea, Abies, Tsuga) are rarely found. Sphagnum mosses and ferns prevailed in the group and characterized by the presence of *Selaginella sanguinolenta*. Pollen of herbaceous varied but not numerous (except sedge, which is most likely due to local water-rich localities and also reflected in the frequent discovery of freshwater algae).

Studied spectra has no differences from the spectra of Begunov horizon palynocomplex of regional stratigraphic schemes of Paleogene and Neogene sediments of the North-East (Fradkina, 1995; Grinenko et al., 1998), which allows to date this locality (No 12V14) as Pliocene.

**Table 2. Distribution of palynomorphs in section 12V14.**

| <i>Sample</i>                       | 12V14    |          |           |           |           |
|-------------------------------------|----------|----------|-----------|-----------|-----------|
| <i>No</i>                           | 7        | 6        | 3         | 2         | 1         |
| <i>Age</i>                          | Pliocene |          |           |           |           |
| <b><u>Pollen of gymnosperms</u></b> | -        | -        | -         | -         | -         |
| Abies                               |          |          | 1         |           | 1         |
| Picea                               | 2        |          | 7         | 4         | 3         |
| Pinus subgen. Diploxylon            |          |          | 1         |           | 2         |
| Pinus subgen. Haploxylon            | 5        | 5        | 74        | 17        | 42        |
| Pinaceae                            |          |          | 9         |           | 17        |
| Tsuga crispa                        |          |          | 1         |           | 3         |
| Tsuga sp.                           |          |          | 5         |           | 4         |
| Larix                               |          |          | 1         |           | 1         |
| <b>sum</b>                          | <b>7</b> | <b>5</b> | <b>99</b> | <b>21</b> | <b>73</b> |
| <b><u>Pollen of angiosperm</u></b>  |          |          |           |           |           |
| Betula arboraceous                  |          |          | 18        | 2         | 31        |
| Betula sect. Nanae                  | 1        |          | 31        |           | 51        |
| Alnus                               |          |          | 3         |           | 3         |
| Alnaster                            |          | 1        | 12        | 1         | 27        |
| Carpinus                            |          |          |           |           | 2         |
| Corylus                             |          |          | 3         |           | 9         |
| Salix                               |          |          |           |           | 9         |
| Elaeagnus                           | 4        |          | 1         |           | 2         |

|                |   |  |    |  |    |
|----------------|---|--|----|--|----|
| Lonicera       |   |  | 1  |  |    |
| Myrica         |   |  | 4  |  | 2  |
| Ericales       | 2 |  | 15 |  | 9  |
| Poaceae        |   |  | 5  |  | 4  |
| Chenopodiaceae |   |  | 1  |  | 1  |
| Cyperaceae     |   |  | 58 |  | 54 |
| Cichoriaceae   |   |  |    |  | 7  |
| Artemisia      |   |  | 1  |  |    |
| Ranunculaceae  |   |  |    |  | 2  |



## ***Area 2***

### ***Subarea 2.1***

*The northern part of Tas-Ary Island*

*Location No 22V14 and 29-v14.*

The studied samples are characterized by a very similar taxonomic and quantitative composition. Palynological complex is dominated by gymnosperm pollen reaching 60% of the total number of palynomorphs (Table 3). All samples contain prasinophytes - *Cymatiosphaera* sp., *Paralecaniella indentata* (Deflandre et Cookson) Cookson et Eisenack, *Pterospermella* sp., which indicate the deposition of sediments in heavily watered, probably lagoon environments. Redeposition of poorly preserved Paleozoic-Mesozoic spores and pollen is also noted. Samples 29-v14-1, 22-v14-5, and 22-v14-3 contain redeposited dinocysts *Sverdrupiella* spp. which are typical for the Carnian-Norian deposits of Arctic Canada and Alaska (Wiggins, 1973; Bujak and Fischer, 1976; Felix, Burbridge 1978).

The group of gymnosperm pollen is dominated by the pollen of *Pinus* s/g *Haploxylon* et *Diploxylon* and *Taxodiaceae-Cupressaceae*; there are *Tsuga canadensis* (L.) Carrière, *T. crispa* Zakl., *T. torulosa* Zakl., *T. sp.*, *Abies* sp., *Picea* sect. *Omorica* Willk., *P. sect. Eupicea* Willk., *P. tobolica* Pan., *Sciadopitys* sp., *Podocarpus* sp. The angiosperm pollen is dominated by representatives of *Juglandaceae* (*Juglans polyporata* Vojc., *J. sieboldianiformis* Vojc., *J. nigripites* Wodehouse, *J. sp.*, *Carya glabraeformis* C. *spackmania*, *Pterocarya stenopteroides* Vojc., *P. sp.*) and *Fagace* spp., *Fagus* sp., *F. tenella*, *F. orientalisformis*, *F. grandifoliiformis*, other taxa, including *Betulaceae*, were found in few samples. Spores are rare and are represented by *Polypodiaceae*, *Lycopodium* sp., *Osmunda* spp., and rare *Sphagnum* sp., *Sporites durabilis* (Dokt.-Hreb.).

The predominance of gymnosperm pollen and presence of such angiosperm taxa as *Juglans polyporata*, *J. sieboldianiformis*, *Pterocarya stenopteroides*, *Carya glabraeformis*, *Carya spackmania*, *Fagus grandifoliiformis* *F. tenella*, make it possible to date the palynological complex as Early Oligocene (Panova, 1971; Volkova, Kulkova, 1980, 1984; Prakticheskaya ..., 1990). According to palynological data, the vegetation of coniferous-deciduous forests is being reconstructed.

**Table 3. Distribution of palynomorphs in section 29-v14 и 22-v14**

| Samples                                                      | 29-v14-4   | 29-v14-3   | 29-v14-2   | 29-v14-1   | 22-v14-5   | 22-v14-4  | 22-v14-3   | 22-v14-2   | 22-v14-1   |
|--------------------------------------------------------------|------------|------------|------------|------------|------------|-----------|------------|------------|------------|
| <b>Oligocene</b>                                             |            |            |            |            |            |           |            |            |            |
| <u><i>Spores of mosses and ferns</i></u>                     |            |            |            |            |            |           |            |            |            |
| Sphagnum sp.                                                 | 1          |            |            |            |            |           |            |            |            |
| Lycopodium sp.                                               | 1          | 1          | 1          |            |            |           |            |            |            |
| Polypodiaceae                                                | 2          | 2          | 2          | 2          | 3          | 1         | 3          |            | 2          |
| Osmunda spp.                                                 | 1          | 2          | 1          |            |            | 2         | 2          | 1          | 1          |
| Sporites durabilis                                           |            | 1          |            | 2          |            |           |            |            |            |
| <b>sum</b>                                                   | <b>5</b>   | <b>6</b>   | <b>4</b>   | <b>4</b>   | <b>3</b>   | <b>3</b>  | <b>5</b>   | <b>1</b>   | <b>3</b>   |
| <u><i>Pollen of gymnosperms</i></u>                          |            |            |            |            |            |           |            |            |            |
| Podocarpus sp.                                               | 1          | 1          | 1          | 2          | 1          | 1         |            | 1          |            |
| Abies sp.                                                    | 1          | 2          | 4          |            | 1          |           | 3          | 2          | 4          |
| Tsuga spp. (T. canadensis, T. crispa, T. torulosa, T. sp.)   | 3          | 2          | 3          |            | 1          |           | 6          | 4          |            |
| Picea spp. (P. sect. Omorica, P. sect. Eupicea, P. tobolica) | 2          | 1          | 2          |            |            |           | 1          | 1          |            |
| Pinus s/g Haploxylon et Diploxylon                           | 51         | 87         | 61         | 40         | 80         | 29        | 103        | 88         | 71         |
| Sciadopitys sp.                                              | 3          | 2          |            |            |            |           | 4          | 3          |            |
| Taxodiaceae-Cupressaceae                                     | 90         | 102        | 79         | 58         | 68         | 38        | 74         | 89         | 99         |
| <b>sum</b>                                                   | <b>151</b> | <b>197</b> | <b>150</b> | <b>100</b> | <b>151</b> | <b>68</b> | <b>191</b> | <b>188</b> | <b>174</b> |
| <u><i>Pollen of angiosperm</i></u>                           |            |            |            |            |            |           |            |            |            |
| Potamogeton sp.                                              | 1          |            | 1          |            |            |           | 1          |            |            |
| Myrica spp.                                                  | 2          | 1          | 4          | 2          | 4          |           | 1          | 2          | 7          |
| Comptonia sp.                                                |            |            |            | 2          |            |           | 1          |            | 3          |
| Juglandaceae                                                 | 1          | 2          | 4          | 2          | 6          | 3         | 5          | 3          | 6          |

|                           |    |    |    |    |    |    |   |    |    |
|---------------------------|----|----|----|----|----|----|---|----|----|
| Platycarya sp.            |    |    |    |    |    |    |   |    |    |
| Carya glabraeformis       | 4  | 5  | 3  | 6  | 4  | 1  | 4 | 4  | 11 |
| Carya spackmania          | 2  |    |    |    |    |    |   | 1  | 2  |
| Juglans sp.               | 4  | 7  | 8  | 6  | 6  | 10 |   | 1  | 2  |
| Juglans nigripites        | 2  |    |    |    | 3  |    |   | 1  |    |
| Juglans polyporata        | 6  | 4  | 4  | 2  | 5  | 4  | 2 | 3  | 3  |
| Juglans sieboldianiformis | 11 | 9  | 1  |    | 4  |    |   | 1  |    |
| Pterocarya sp.            | 1  | 2  |    | 2  |    |    | 1 |    | 3  |
| Platycarya sp.            |    |    |    |    |    | 1  |   |    |    |
| Corylus sp.               | 1  | 2  |    |    |    | 3  | 1 | 1  |    |
| Carpinus sp.              | 1  |    | 1  |    |    | 2  |   | 1  |    |
| Ostrya sp.                |    |    |    |    |    |    |   | 1  |    |
| Betula sp.                | 1  | 1  | 1  | 1  | 1  | 1  | 1 | 1  |    |
| Alnus sp.                 | 4  | 3  | 4  | 2  | 5  |    | 2 | 1  | 5  |
| Fagaceae                  |    |    |    |    |    |    | 2 |    |    |
| Fagus orientaliiformis    |    |    |    | 4  | 8  | 1  | 1 | 1  | 8  |
| Fagus grandifoliiformis   | 1  | 2  |    | 4  | 2  |    |   |    |    |
| Fagus sp.                 |    |    | 5  |    | 1  |    |   |    |    |
| Fagus tenella             | 9  | 3  |    |    |    |    |   |    |    |
| Castanea sp.              |    |    |    |    | 1  |    |   |    | 1  |
| Castanopsis sp.           | 1  |    | 1  |    | 1  |    |   | 1  |    |
| Quercus spp.              | 36 | 30 | 34 | 22 | 34 | 6  | 8 | 11 | 18 |
| Ulmus sp.                 | 4  | 2  | 2  | 1  | 4  | 1  | 2 | 2  | 5  |
| Moraceae                  | 1  |    |    |    | 1  |    | 1 |    | 1  |
| Hamamelidaceae            | 5  | 2  | 2  | 2  |    | 2  |   |    | 5  |
| Liquidambar sp.           | 3  | 1  | 1  | 1  | 1  | 2  |   | 1  | 1  |
| Rhus sp.                  | 1  |    |    |    |    |    |   |    |    |
| Rhoipites cf. granulatus  |    | 1  |    | 3  |    |    |   |    |    |

|                                        |            |           |           |           |           |           |           |           |           |
|----------------------------------------|------------|-----------|-----------|-----------|-----------|-----------|-----------|-----------|-----------|
| Acer sp.                               | 1          |           |           |           |           |           |           |           |           |
| Tilia sp.                              |            | 1         | 2         | 1         | 1         |           |           |           |           |
| Nyssa sp.                              |            |           | 1         | 1         |           |           |           |           | 1         |
| Cercidiphyllum sp.                     | 1          | 1         | 1         |           | 1         |           |           |           |           |
| Araliaceae                             | 1          |           |           |           |           |           |           |           |           |
| Ericales                               | 2          | 1         | 1         |           | 1         |           |           | 1         | 1         |
| Sapotaceae                             |            |           |           |           |           |           |           | 1         |           |
| Rosaceae                               | 2          | 1         | 1         |           | 1         |           |           |           |           |
| Oleaceae                               |            |           |           |           | 1         |           |           |           |           |
| Triporopollenites sp.                  |            |           |           | 1         |           |           |           |           |           |
| Tricolpopollenites sp.                 | 3          | 2         | 7         |           |           | 5         | 1         | 1         | 3         |
| Tricolporopollenites<br>pseudocingulum |            |           |           | 1         |           |           | 1         |           | 5         |
| Tricolporopollenites sp.               |            | 2         | 2         |           | 1         |           |           | 1         | 1         |
| Momipites sp.                          | 6          | 5         | 5         | 1         | 1         | 1         |           | 1         |           |
| <b>sum</b>                             | <b>118</b> | <b>90</b> | <b>96</b> | <b>67</b> | <b>98</b> | <b>43</b> | <b>35</b> | <b>42</b> | <b>92</b> |
| <b>REWORKING</b>                       |            |           |           |           |           |           |           |           |           |
| spores and pollen PZ-MZ                | 4          | 2         | 1         | 3         | 2         | 1         |           | 4         | 5         |
| prasinophytes PZ-MZ                    | 1          | 1         |           | 1         | 5         |           | 2         | 3         | 6         |
| acritarchs PZ-MZ                       | 1          | 1         | 4         | 2         | 3         | 1         | 1         | 2         | 12        |
| <i>Sverdrupiella</i> spp.              |            |           |           | 6         | 3         |           | 3         |           |           |
| <b>sum</b>                             | <b>6</b>   | <b>4</b>  | <b>5</b>  | <b>12</b> | <b>13</b> | <b>2</b>  | <b>6</b>  | <b>9</b>  | <b>23</b> |
| <b>PRASINOPHYTES</b>                   |            |           |           |           |           |           |           |           |           |
| Cymatiosphaera sp.                     |            |           |           | 1         | 1         |           |           |           | 1         |
| Ovoidites sp.                          | 1          |           |           |           |           |           |           |           | 1         |
| Paralecaniella indentata               | 3          | 2         |           |           |           |           |           | 1         |           |
| Pterospermella sp.                     |            | 1         |           |           | 1         |           |           | 1         |           |
| <b>sum</b>                             | <b>4</b>   | <b>3</b>  | <b>0</b>  | <b>1</b>  | <b>2</b>  | <b>0</b>  | <b>0</b>  | <b>2</b>  | <b>2</b>  |

*Cenozoic deposits have been studied in the central part of Tas-Ary*

*Location No 18V14.*

Spectra of studied samples are close to each other, which allows to combine them into a single palynocomplex (Table 4). A slight prevail of contents of angiosperm pollen over gymnosperms pollen is typical for the studied samples. Main species in palynocomplex are *Pinus* subgen. *Haploxylon*, *Pinus* sect. *Cembra*, *Pinaceae*, *Tsuga* spp., birch and alder ~~wood~~ tree forms, with subordinate amount of pollen of shrub forms. Pollen of thermophilic angiosperms (*Corylus*, *Myrica*, *Juglandaceae*, *Ulmus*, and others) takes a subordinate position. Spectra characterized by the presence of pollen of *Taxodiaceae*. Studied palynocomplex is similar to Onkuchah palynocomplex of regional horizon (Fradkin, 1995; Grinenko et al., 1998), indicating that the age of occurrence 18V14 is Late Oligocene.

The dynamics of increasing of quantity of organic-microplankton upwards in the section shows transgressive trend of the basin development at that time. So, most of the samples characterize heavily watered (lake) paleoenvironment, and sample No 18V14-8 characterizes shallow marine paleoenvironment, as evidenced by the presence of dinocysts *Chiropteridium* cf. *galea*, *Alterbidinium* sp., *Cordosphaeridium* cf. *inodes* (Table 4). It should be noted that the *Chiropteridium* cf. *galea* is zonal species of western European zone D13 (Vandenberghe et al., 2012), and its first appearance is dated as the Early Rupel. The *Chiropteridium partispinatum* (= *C. Galea*) is established in the sediments of the Late Rupel - Hutt in the south of the European part of Russia and Ukraine (Zaporozhets, 1999; Andreyeva-Grigorovich et al., 2011; unified ..., 2015). The disappearance of these species is observed in the Lower Aquitanian.

Thus, the data indicate the Late Oligocene age of the 18V14 section deposits.

**Table 4. Distribution of palynomorphs in section 18V14.**

| <i>Sample</i>                       | 18V14          |           |           |           |           |
|-------------------------------------|----------------|-----------|-----------|-----------|-----------|
| <i>No</i>                           | 8              | 6         | 4         | 3         | 1         |
| <i>Age</i>                          | Late Oligocene |           |           |           |           |
| <u><i>Pollen of gymnosperms</i></u> |                |           |           |           |           |
| Taxodiaceae-Cupressaceae            | 17             | 1         | 31        | 7         | 6         |
| Abies                               | 1              | 1         | 1         | 2         | 2         |
| Picea                               | 2              | 1         | 1         | 4         | 3         |
| Pinus subgen. Diploxylon            | 1              |           | 1         | 3         | 1         |
| Pinus subgen. Haploxylon            | 28             | 5         | 4         | 18        | 4         |
| Pinus sect. Cembrae                 | 13             | 10        | 3         | 29        | 41        |
| Pinaceae                            | 12             | 13        | 5         | 18        | 11        |
| Podocarpus sp.                      | 3              |           | 1         |           |           |
| Tsuga crispa                        | 3              | 2         | 1         | 2         | 2         |
| Tsuga canadensis                    | 9              | 4         | 2         | 10        | 11        |
| Larix                               | 1              |           |           |           | 1         |
| Sciadopitys sp.                     |                | 1         |           |           |           |
| Cedrus sp.                          | 1              |           |           |           |           |
| <b>sum</b>                          | <b>91</b>      | <b>38</b> | <b>50</b> | <b>93</b> | <b>82</b> |
| <u><i>Pollen of angiosperm</i></u>  |                |           |           |           |           |
| Betula (tree forms)                 | 8              | 12        | 12        | 16        | 39        |
| Betulaceae                          | 5              | 2         | 5         | 1         | 2         |
| Betula sect. Nanae                  |                |           |           |           | 4         |
| Alnus                               | 10             | 31        | 23        | 7         | 6         |
| Alnaster                            |                | 3         | 1         | 1         | 4         |
| Carpinus                            |                |           | 1         | 1         |           |
| Corylus                             | 4              | 20        | 10        | 1         | 4         |
| Myrica                              | 1              | 7         | 8         | 9         | 5         |
| ?Comptonia sp.                      |                | 4         | 9         | 1         | 4         |
| Ulmus sp.                           | 1              | 1         | 1         | 1         | 1         |
| Fagaceae                            | 1              | 1         |           | 1         | 1         |
| Dipsacaceae                         | 1              | 1         | 1         | 1         | 1         |
| Ericales                            | 32             | 51        | 58        | 51        | 32        |
| Juglans polyporata                  | 1              | 1         | 2         | 1         |           |
| Juglans sp.                         |                |           |           |           | 2         |
| Herbae                              | 1              | 1         | 1         | 1         |           |
| Triporopollenites sp.               |                | 1         | 4         | 1         |           |
| Tricolpites sp.                     | 1              |           | 1         | 1         |           |
| Rhoipites sp.                       |                |           |           | 1         |           |
| ?Elytrante sp.                      |                |           |           | 1         |           |
| Fagus sp.                           | 1              | 1         | 1         | 1         |           |
| Carya sp.                           | 4              |           |           | 1         |           |
| Cyperaceae                          | 1              | 1         |           | 1         |           |

|                                          |            |            |            |            |            |
|------------------------------------------|------------|------------|------------|------------|------------|
| Aldrovanda sp.                           | 1          | 1          | 1          |            | 1          |
| Onagraceae                               |            |            |            |            | 2          |
| Polygonaceae                             |            |            |            | 1          |            |
| Valerianaceae                            | 2          |            |            |            | 1          |
| Liliaceae                                | 1          | 1          | 1          | 1          |            |
| Lonicera                                 | 1          | 1          | 1          | 1          |            |
| Diervilla sp.                            | 1          | 1          | 1          | 1          | 1          |
| Trapa                                    |            |            | 1          | 1          | 1          |
| Potamogeton                              | 12         | 16         | 13         | 8          | 15         |
| Rutaceae                                 |            | 1          | 2          |            |            |
| Quercus graciliformis                    |            |            | 1          |            |            |
| Quercus forestdalensis                   |            | 1          | 1          |            |            |
| Quercus sp.                              | 1          | 3          | 3          |            |            |
| Liquidambar sp.                          | 1          | 1          | 1          |            |            |
| Ilex sp.                                 | 1          |            | 1          |            |            |
| Pterocarya sp.                           | 2          | 1          |            |            |            |
| Rosaceae                                 | 1          |            |            |            |            |
| Moraceae                                 | 1          |            |            |            |            |
| Araliaceae                               | 2          |            |            |            |            |
| Hamamelidaceae                           | 2          |            |            |            |            |
| <b>sum</b>                               | <b>101</b> | <b>165</b> | <b>165</b> | <b>113</b> | <b>126</b> |
| <b><u>Spores of mosses and ferns</u></b> |            |            |            |            |            |
| Sporites durabilis                       | 1          | 2          |            | 1          | 1          |
| Sphagnum                                 | 4          | 4          | 7          | 3          | 7          |
| Pteridaceae                              | 8          | 4          | 4          | 4          | 4          |
| Lycopodiella inundata                    | 1          | 1          | 1          | 1          |            |
| Selaginella cf. selaginoides             |            | 1          | 1          | 1          |            |
| Polypodiaceae                            | 45         | 113        | 62         | 67         | 63         |
| Lycopodium spp.                          | 8          | 18         | 7          | 7          | 7          |
| Osmunda                                  | 3          | 12         | 4          | 10         | 4          |
| Salviniaceae                             | 1          |            |            | 1          |            |
| Ricchia                                  | 1          | 1          |            | 2          | 1          |
| Husperzia sp.                            |            | 1          | 1          |            |            |
| Selaginella cf. rupestris                | 1          |            |            |            |            |
| <b>sum</b>                               | <b>73</b>  | <b>157</b> | <b>87</b>  | <b>97</b>  | <b>87</b>  |
| <b><u>Dinocysts</u></b>                  |            |            |            |            |            |
| Alterbidinium sp.                        | 1          |            |            |            |            |
| Chiropteridium cf. galea                 | 1          |            |            |            |            |
| Cordosphaeridium cf. inodes              | 1          |            |            |            |            |
| <b>sum</b>                               | <b>3</b>   | <b>0</b>   | <b>0</b>   | <b>0</b>   | <b>0</b>   |
| <b><u>Freshwater algae</u></b>           |            |            |            |            |            |
| Botryococcus                             |            |            |            | 1          |            |
| Sigmopollis                              | 1          | 7          | 2          |            | 1          |

|                                                       |    |    |   |   |   |
|-------------------------------------------------------|----|----|---|---|---|
| Incertae sedis                                        | 6  |    | 1 |   |   |
| Pediastrum                                            | 1  |    |   | 2 |   |
| Ovoidites                                             | 1  | 1  | 1 | 1 | 3 |
| Schizocysta sp.                                       | 1  |    | 1 | 1 | 1 |
| Acritarch                                             |    | 1  | 1 | 1 |   |
| Zygnemataceae                                         |    | 1  |   |   |   |
| <b>sum</b>                                            | 10 | 10 | 6 | 6 | 5 |
| <b><u>Paleozoic and Mesozoic<br/>palynomorphs</u></b> |    |    |   |   |   |
| Dictyoplyllidites sp.                                 |    |    | 1 | 1 |   |
| Araucaria sp.                                         |    | 1  |   |   |   |
| Nudopollis sp.                                        | 1  | 1  |   |   |   |
| Tripartina variabilis                                 |    | 1  |   |   |   |
| Podocarpidites sp.                                    |    | 1  |   |   |   |
| Quadriculina sp.                                      |    | 1  |   |   |   |
| Disaccites                                            | 1  |    |   |   |   |

## Subaræa 2.2.

### Durnaya Lagoon

*Location No 24V14.*

In this locality diverse spectra obtained from the samples No 24V14-16 and 24V14-25. The rest of the samples contain a minor amount of palynomorphs (Table 5). Palynomorphs are are broken and corroded. Also, small numerous relatively rounded carbonaceous particles are present, which were probably redeposited. The presence of redeposited Jurassic-Cretaceous taxa is reported throughout the section, the number of which varies from 29% to 77%.

Gymnosperm pollen dominates and are represented mainly by *Pinus* sect. *Cembrae* and *Pinus* subgen; *Haploxylon*, *Picea* and subordinate quantity of dark coniferous pollen - *Abies* and *Tsuga*. *Podocarpus*, *Taxodiaceae-Cupressaceae* and *Pinus protocembra*, which are likely to be redeposited, are observed sporadically. Dwarf birch and *Alnaster* pollen occurs frequently among angiosperms. Grass pollen is scarce and monotonous. It is represented mostly by sedge and clove and in a less degree by cereals. The spore part is dominated by sphagnum mosses and polypod ferns. *Selaginella* and *Lycopodium* are rarer there.

Established composition of spectra allows one to reconstruct the forest-tundra vegetation grows in a relatively warm boreal climate. In general, this type of vegetation is established in the Arctic region for the deposits not younger than the Late Pliocene (Fradkina, 1983, 1995).



Fixed part of the spectra is close to Kutuyah horizon of regional stratigraphic scheme; thus, the age sediments could be restricted as Pleistocene.

**Table 5. Distribution of palynomorphs in section 24V14.**

| <i>Sample</i>                            | <b>24V14</b>       |           |           |           |           |
|------------------------------------------|--------------------|-----------|-----------|-----------|-----------|
| <i>No</i>                                | <b>25</b>          | <b>21</b> | <b>19</b> | <b>17</b> | <b>16</b> |
| <i>Age</i>                               | <b>Pleistocene</b> |           |           |           |           |
| <b><i>Pollen of gymnosperms</i></b>      |                    |           |           |           |           |
| Abies                                    | 1                  |           | 1         |           | 6         |
| Picea                                    | 12                 | 3         |           |           | 8         |
| Pinaceae                                 | 13                 | 7         | 3         | 6         | 28        |
| Pinus protocembra                        |                    |           | 4         |           | 2         |
| Pinus sect. Cembrae                      | 14                 |           | 1         | 3         | 10        |
| Pinus subgen. Haploxylon                 | 15                 | 9         |           |           | 13        |
| Podocarpus                               |                    |           |           |           | 3         |
| Tsuga sp.                                | 2                  |           |           |           | 1         |
| Taxodiaceae-Cupressaceae                 |                    | 2         |           | 1         | 1         |
| <b>sum</b>                               | <b>57</b>          | <b>21</b> | <b>9</b>  | <b>10</b> | <b>72</b> |
| <b><i>Pollen of angiosperm</i></b>       |                    |           |           |           |           |
| Betulaceae                               |                    |           |           | 2         | 5         |
| Betula древ.                             | 2                  |           |           |           | 5         |
| Betula sect. Nanae                       | 12                 |           |           | 2         | 5         |
| Alnus sp.                                |                    |           |           |           | 1         |
| Alnaster sp.                             | 11                 |           |           |           | 2         |
| Ericales                                 |                    |           |           | 1         | 5         |
| Poaceae                                  | 1                  |           |           |           | 1         |
| Cyperaceae                               | 3                  |           | 1         | 1         | 1         |
| Caryophyllaceae                          | 2                  |           |           |           | 1         |
| Carpinus sp.                             |                    |           | 1         |           |           |
| Salix sp.                                | 4                  |           | 1         |           |           |
| Equisetum                                | 6                  |           |           |           |           |
| Corylus sp.                              | 1                  |           |           |           |           |
| <b>sum</b>                               | <b>42</b>          | <b>0</b>  | <b>3</b>  | <b>6</b>  | <b>26</b> |
| <b><i>Spores of mosses and ferns</i></b> |                    |           |           |           |           |
| Sphagnum sp.                             | 4                  |           |           | 1         | 6         |
| Lycopodium sp.                           |                    |           |           |           | 2         |
| Osmunda sp.                              |                    |           | 4         |           | 4         |
| Polypodiaceae                            | 7                  |           |           |           | 3         |
| Selaginella rupestris                    | 1                  |           |           |           | 1         |
| Selaginella sanguinolenta                | 1                  |           | 1         |           |           |
| Lycopodium cf. lagopus                   | 2                  |           |           |           |           |
| Lycopodium alpinum                       | 1                  |           |           |           |           |
| Ophioglossum sp.                         | 1                  |           |           |           |           |
| Riccia sp.                               | 1                  |           |           |           |           |
| <b>sum</b>                               | <b>18</b>          | <b>0</b>  | <b>5</b>  | <b>1</b>  | <b>16</b> |

## References

Andreeva-Grigorovich A.S., Zaporozhets N.I., Shevchenko T.V., Alexandrova G.N., Vasilyeva O.N., Yakovleva A.I., Stotland A.B., Savitskaya N.A. Atlas of Paleogene dinocysts of Ukraine, Russia and neighboring countries / Project Naukova Book. - Kiev: Naukova Dumka, 2011. -- 224 p.

Grinenko O.V., Sergeenko A.I., Belolyubsky I.N. Paleogene and Neogene of the North-East of Russia. Regional stratigraphic scheme of Paleogene and Neogene deposits of the North-East of Russia and an explanatory note to it. Parts I - II. - Yakutsk: publishing house of YSC SB RAS, 1998. – 68 p.

Zaporozhets N.I. Palynostratigraphy and zonal subdivision by dinocysts of the Middle Eocene - Lower Miocene deposits of the river. White (North Caucasus) // Stratigraphy. Geol. correlation. - 1999. - Volume 7. - No. 2. - S. 61-78.

Resolutions of the ICC and its standing committees. Issue 41. -- SPb.: VSEGEI, 2012. -- 48 p.

Unified stratigraphic scheme of Paleogene deposits of the Volga-Caspian subregion. Explanatory letter. - M.: FGUP "VNIGNI", 2015. - 96 p. + 8 sheets.

Fradkina A.F. Palynostratigraphy of Paleogene and Neogene deposits of the North-East. - Novosibirsk: OIGGM SO RAN, 1995. -- 82 p.

Fradkina A.F. Palynoflora of the Neogene of Northeast Asia. - M.: Nauka, 1983. -- 224 p.

Yakovleva A.I., Alexandrova G.N. On the issue of clarifying the zonal division by dinocysts of the Paleocene-Eocene deposits of Western Siberia // Bulletin MOIP. Dept. Geol. - 2013. - Volume 88. - Issue No. 1. - P. 59-82.

Yakovleva A.I., Alexandrova G.N., Gnibidenko Z.N. On the refinement of the age of the Paleogene Lyulinvor Formation in the south of Western Siberia based on palynological and paleomagnetic data // Bulletin MOIP. Dept. Geol. - 2012. - Volume 87. - Issue No. 3. - P. 5

Iakovleva A.I., Heilmann-Clausen C. Eocene dinoflagellate cyst biostratigraphy of research borehole 011-BP, Omsk Region, southwestern Siberia // Palynology. 2010. - № 34: 2. – P. 195-232.

Luterbacher H.P., Ali J.R., Brinkhuis H. et al. The Paleogene Period// The Geologic Time Scale 2004 – Editors F.M. Gradstein, J.G. Ogg, M.D. Smith. – Cambridge: Cambr. Univ. Press, 2004. – P. 384-408.

Vandenbergh N., Hilgen F.J., Speijer R.P., et al.. The Paleogene Period // The Geologic Time Scale 2012 – Vol. 1, 2. – Editors F.M. Gradstein, J.G. Ogg, M.D. Schmitz, G.M. Ogg. – Boston, USA, Elsevier, 2012. – P. 855-921.

Volkova V.S., Kulkova I.A. Changes in the composition of the paleoflora of Siberia in the Late Cenozoic // Environment and life at the borders of the Cenozoic epochs in Siberia and the Far East. Novosibirsk: Nauka, 1984. P. 54–63.

Volkova V.S., Kulkova I.A. Palynological substantiation of stratigraphic subdivision and correlation of continental Paleogene and Neogene sediments of the south of Western Siberia and Northern Kazakhstan // Paleopalynology of Siberia. Moscow: Nauka, 1980. P. 65–72.

Panova L.A. Oligocene of the West Siberian Lowland // Cenozoic Floras of Siberia according to palynological data. Moscow: Nauka, 1971. P. 40–50.

Practical palynostratigraphy. Ed. Panova L.A., Oshurkova M.V., Romanovskaya G.M. Leningrad: Nedra, 1990. - 348 p.

Bujak J.P., Fisher M.J. Dinoflagellate cysts from the upper Triassic of Arctic Canada // Micropaleontology. 1976. 22: 44-70.

Felix C.J., Burbridge P.P. Status of Triassic Palynology in the Canadian Arctic Islands // Palynologia. 1978. 1: 225-231.

Wiggins V.D. Upper Triassic dinoflagellates from arctic Alaska // Micropaleontology. 1973. 19: 1-17.

## Photo tables

Table 4.

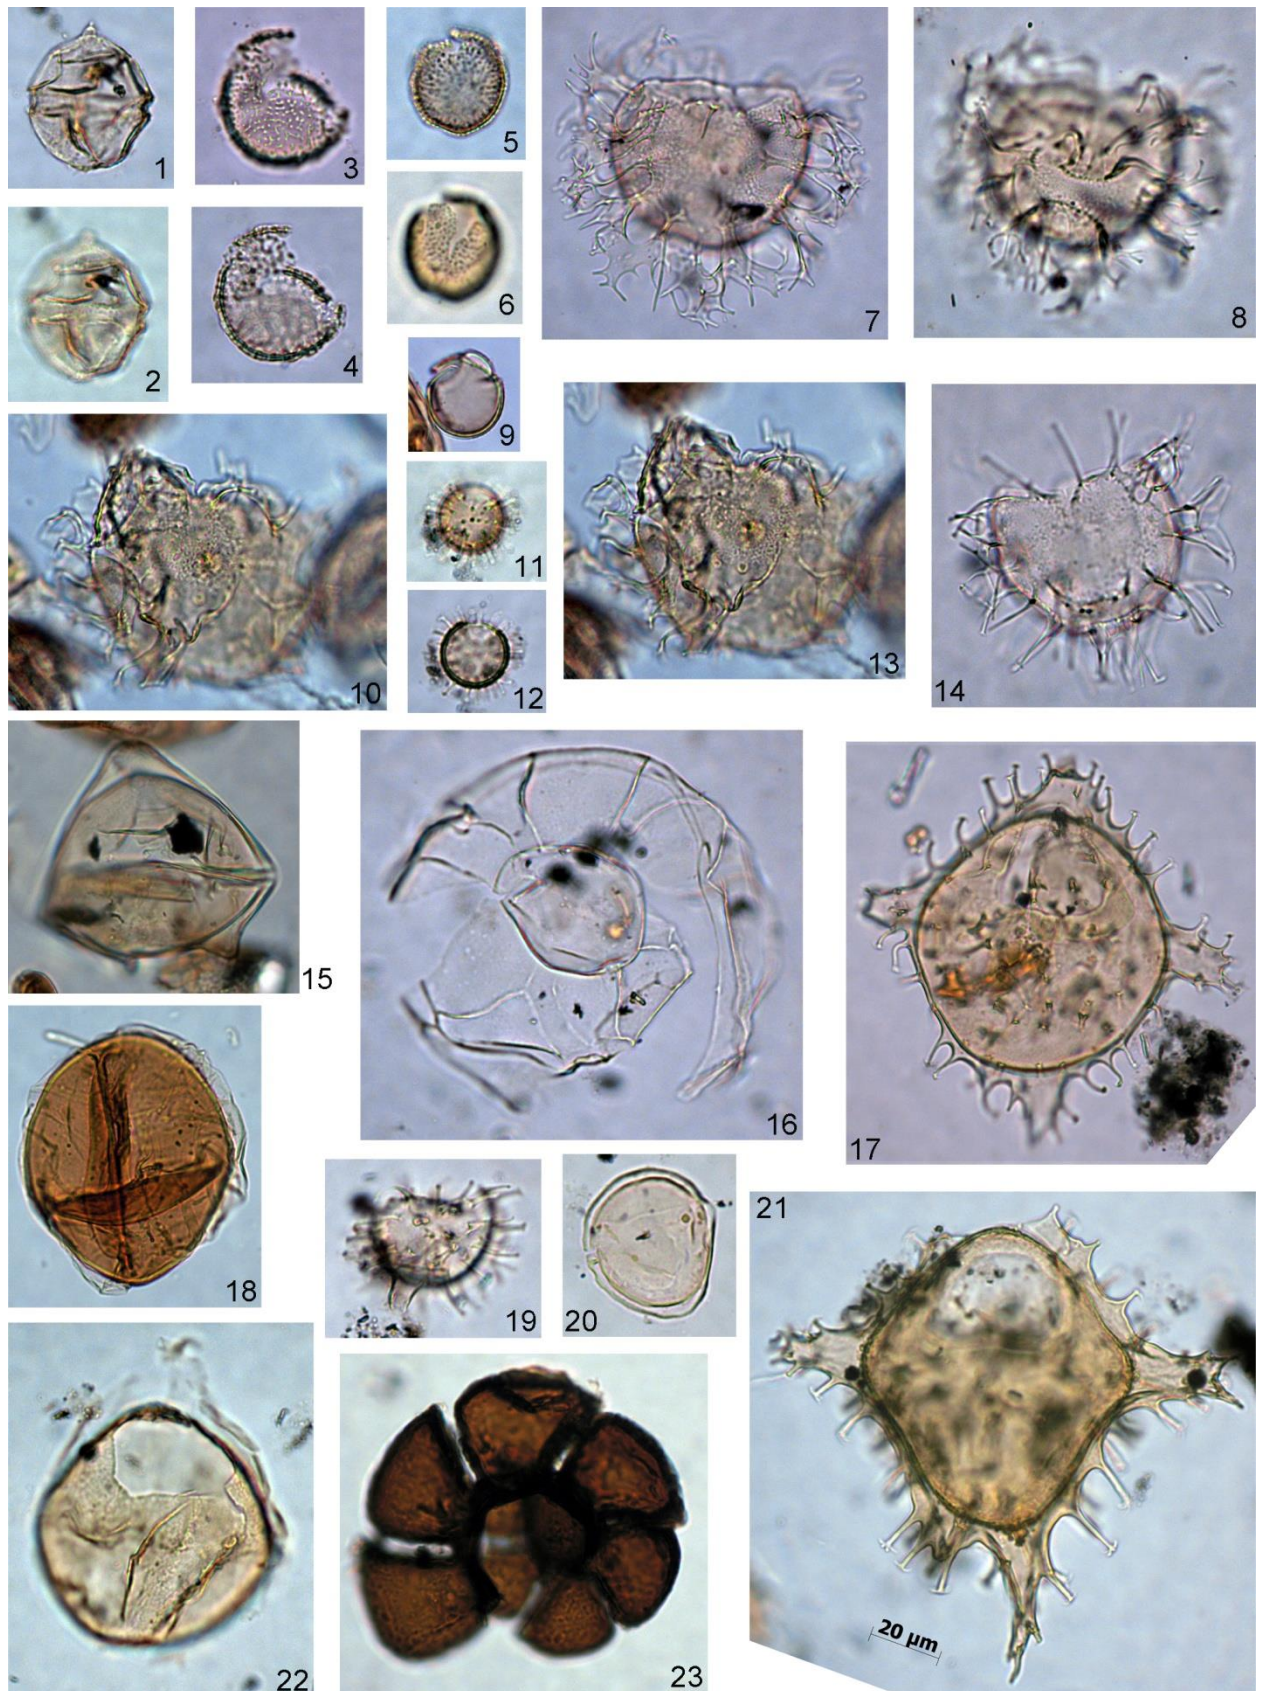

Table 4. **1-2** – *Phthanoperidinium* sp., sample 14AP-16; **3-4** – *Cerebrocysta bartonensis* Bujak, sample 14AP-16; **5-6** – *Elytrocysta brevis* Stover et Hardenbol, sample 14AP-16; **7-8** – *Areoligera coronata* (Wetzel) Lejeune-Carpentier, sample 14AP-16; **9** – *Sigmopollis* sp., sample 18V14-8; **10, 13** – *Chiropteridium* cf. *galea* (Maier) Sarjeant, sample 18V14-8; **11-12** – acantomorph acritarch, sample 14AP-16; **14** – *Areoligera senonensis* Lejeune-Carpentier, sample 14AP-16; **15** – *Alterbidinium* sp., sample 18V14-8; **16** – *Thalassiphora delicata* Williams et Downie, sample 14AP-16; **17** – *Wetzeliella articulata* Wetzel, sample 14AP-16; **18** – Incertae sedis, sample 18V14-8; **19** – *Diphyes colligerum* (Deflandre et Cookson) Cookson, sample 14AP-16; **20** – *Paralecaniella indentata* Deflandre et Cookson, sample 14AP-16; **21** – *Wetzeliella* cf. *samlantica* Eisenack, sample 14AP-16; **22** – *Deflandrea oebisfeldensis* Alberti, sample 14AP-16; **23** – microforaminiferal linings, sample 14AP-16. Magnification x500.



**Table 5.**

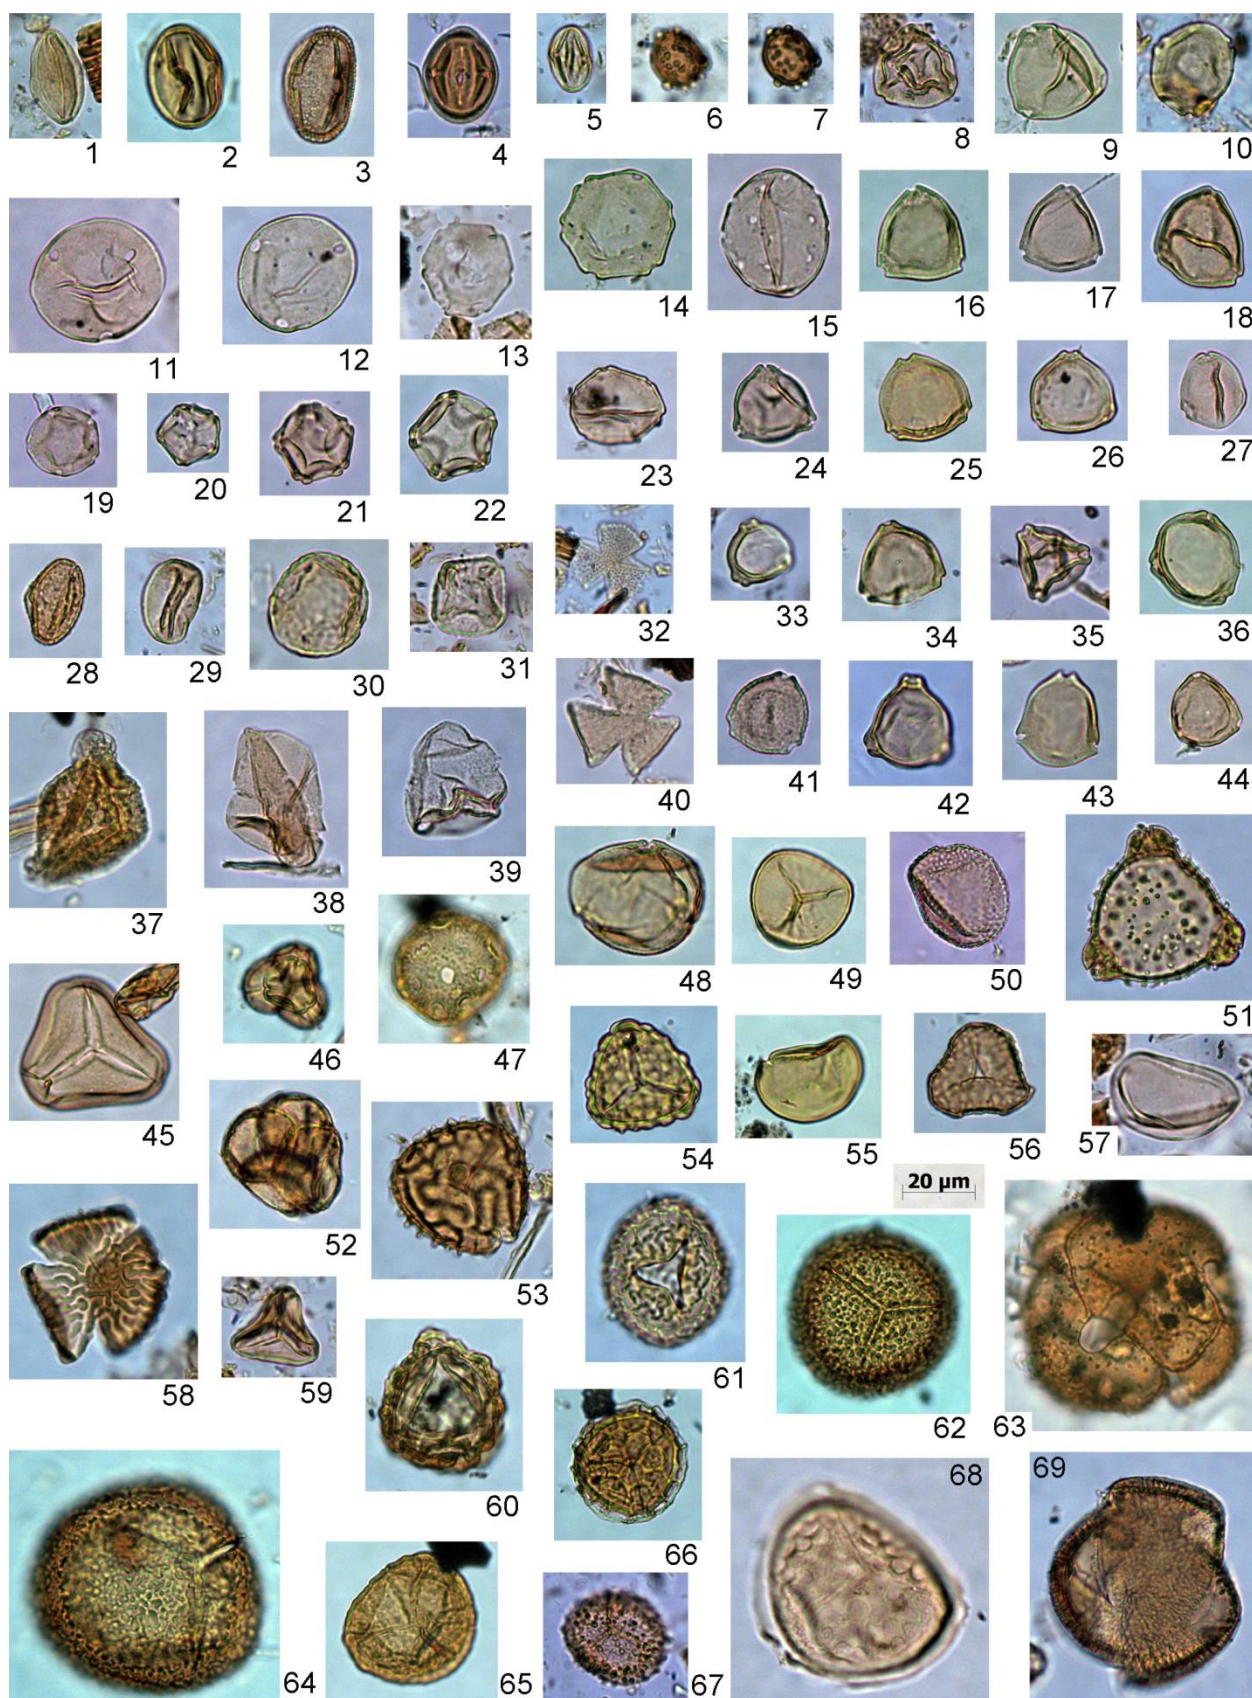

**Table 5. 1** - *Tricoplites* sp., sample 14AP-26; **2** – *Tricolporopollenites ecshweilerensis* Th. et Pfl., sample 18V14-1; **3** – Araliaceae, sample 18V14-3; **4** – *Rhoipites* sp., sample 18V14-3; **5** – *Tricolporopollenites* sp., sample 14AP-26; **6-7** – *Pistillipollenites mcgregorii* Rouse, sample 14AP-16; **8** – *Triatriopollenites plicoides* Zakl., sample 14AP-26; **9** – *Triatriopollenites* sp., sample 18V14-4; **10** –

*Triatriopollenites* sp., sample 14AP-26; **11** – *Carya* sp., sample 18V14-8; **12** – *Carya* sp., sample 18V14-3; **13** – *Pterocarya* sp., sample 14AP-26; **14** – *Pterocarya* sp., sample 18V14-4; **15** – *Juglans polyporata* Voic., sample 18V14-3; **16** – *Myrica* sp., sample 18V14-8; **17-18** – *Corylus* sp., sample 18V14-3; **19** – *Alnaster* sp., sample 18V14-1; **20** – *Alnaster* sp., sample 18V14-3; **21-22** – *Alnus* sp., sample 18V14-3; **23** – *Juglans* sp., sample 14AP-20; **24** – *Myrica* sp., sample 18V14-3; **25** – *Betula* sect. *Nanae*, sample 12V14-3; **26-27** – *Betula* sect. *Nanae*, sample 24V14-25; **28** – *Quercus* sp., sample 18V14-3; **29** – Fagaceae, sample 14AP-26; **30** – *Ulmus* sp., sample 18V14-3; **31** – *Ulmodeipites* sp., sample 14AP-26; **32** – *Hamamelis* sp., sample 14AP-26; **33** – *Betula* sp. (древовидных форм), sample 24V14-16; **34-35** – *Betula* sp. (древовидных форм), sample 18V14-1; **36** – *Betula* spp. (древовидных форм), sample 18V14-3; **37** – *Trapa* sp., sample 18V14-1; **38-39** – Cyperaceae, sample 18V14-8; **40** – *Acer* sp., sample 18V14-4; **41** – Canabaceae, sample 18V14-3; **42** – *Betula* sp. (древовидных форм), sample 18V14-6; **43** – Betulaceae, sample 18V14-8; **44** – Betulaceae, sample 18V14-1; **45** – Pteridaceae, sample 18V14-3; **46** – Ericales, sample 18V14-1; **47** – Caryophyllaceae, sample 24V14-16; **48** – *Fagus* sp., sample 18V14-3; **49** – *Sphagnum* sp., sample 18V14-1; **50** – *Potamogeton* sp., sample 18V14-1; **51** – *Diervilla* sp., sample 18V14-3; **52** – Ericales, sample 18V14-3; **53** – *Lycopodium* sp., sample 18V14-1; **54** – *Ophioglossum* sp., sample 18V14-3; **55** – *Laevigatosporites* sp., sample 14AP-20; **56** – *Huperzia* sp., sample 18V14-4; **57** – Polypodiaceae, sample 14AP-26; **58** – *Sporites durabilis* D.-Hreb., sample 18V14-3; **59** – Gleicheniaceae, sample 14AP-16; **60** – *Selaginella sanguinolenta* (L.) Spring, sample 24V14-19; **61** – *Lycopodiella inundata* (L.) Holub, sample 18V14-8; **62** – *Osmunda* sp., 14AP-20; **63** – *Aldrovanda* sp., sample 18V14-6; **64** – *Osmunda* sp., sample 18V14-1; **65** – *Selaginella rupestris* (L.) Spring, sample 24V14-16; **66** – *Lycopodium* sp., sample 14AP-20; **67** – *Osmunda* sp., sample 14AP-26; **68** – *Riccia* sp., sample 18V14-3; **69** – Dipsacaceae, sample 18V14-3. Magnification x500.



**Table 6.**

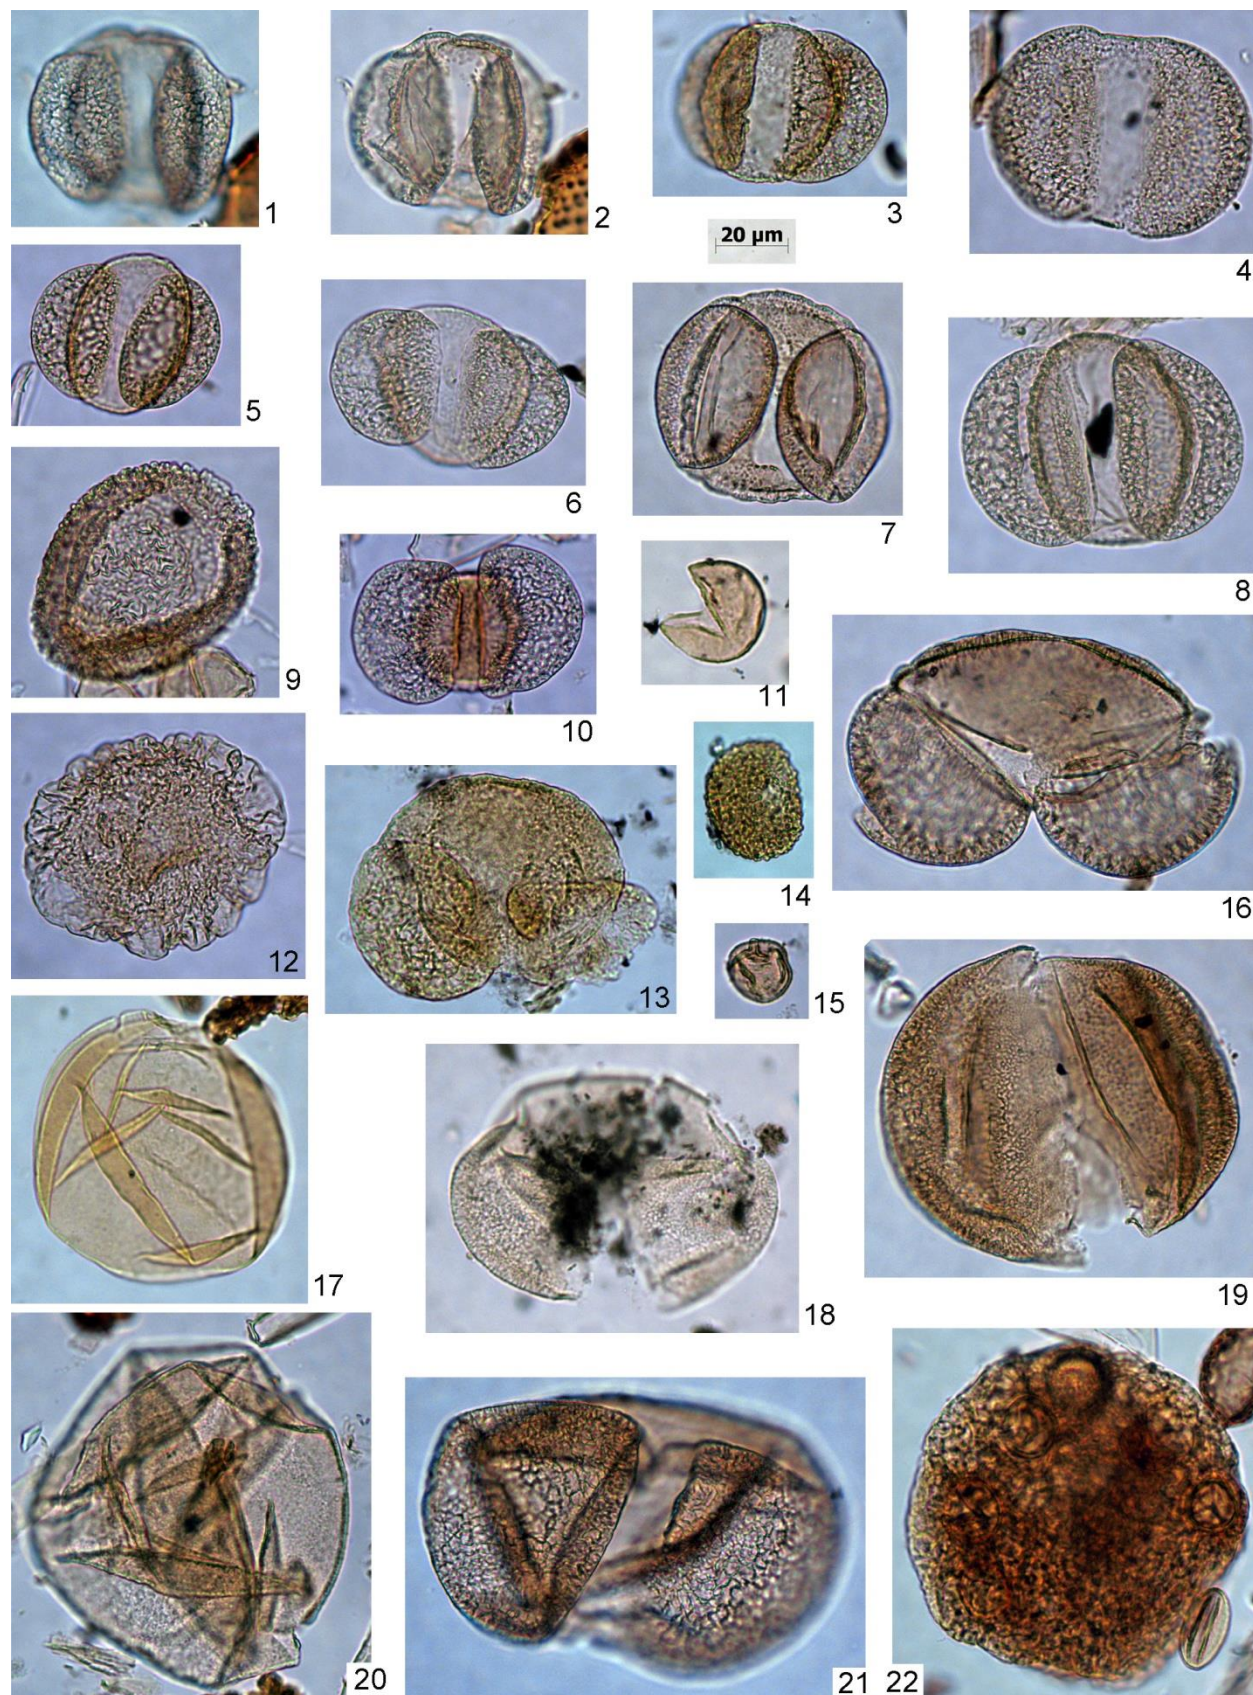

**Table 7.** **1-2** – *Pinus* sect. *Cembrae* (= *Pinus pumila* (Pall.) Regel), sample 18V14-1; **3** – *Pinus* sect. *Cembrae* (= *Pinus sibirica* Du Tour), sample 18V14-1; **4** – Pinaceae, sample 18V14-3; **5-6** – *Pinus* subgen. *Diploxylon*, sample 18V14-3; **7** – *Pinus* sect. *Cembrae*, sample 18V14-3; **8** – *Pinus* subgen. *Haploxylon*, sample 18V14-3; **9** – *Tsuga canadensis* (L.) Carrière, sample 18V14-3; **10** – *Podocarpus* sp.,



sample 18V14-4; **11** – Taxodiaceae-Cupressaceae, sample 14AP-20; **12** – *Tsuga crispa* Zakl., sample 18V14-8; **13** – *Pinus* sp., sample 14AP-20; **14** – *Sciadopitys* sp., sample 14AP-20; **15** – Taxodiaceae-Cupressaceae, sample 18V14-8; **16** – *Abies* sp., sample 18V14-3; **17** – *Larix* sp., sample 18V14-8; **18** – *Picea* sp. (sect. *Omorica*), sample 24V14-25; **19** – *Picea* sp. (sect. *Eupicea*), sample; **20** – *Araucaria* sp., sample 18V14-6; **21** – *Picea* sp. (sect. *Omorica*), sample 18V14-1; **22** – Salviniaceae, sample 18V14-8. Magnification x500. x500.

**Table7.**

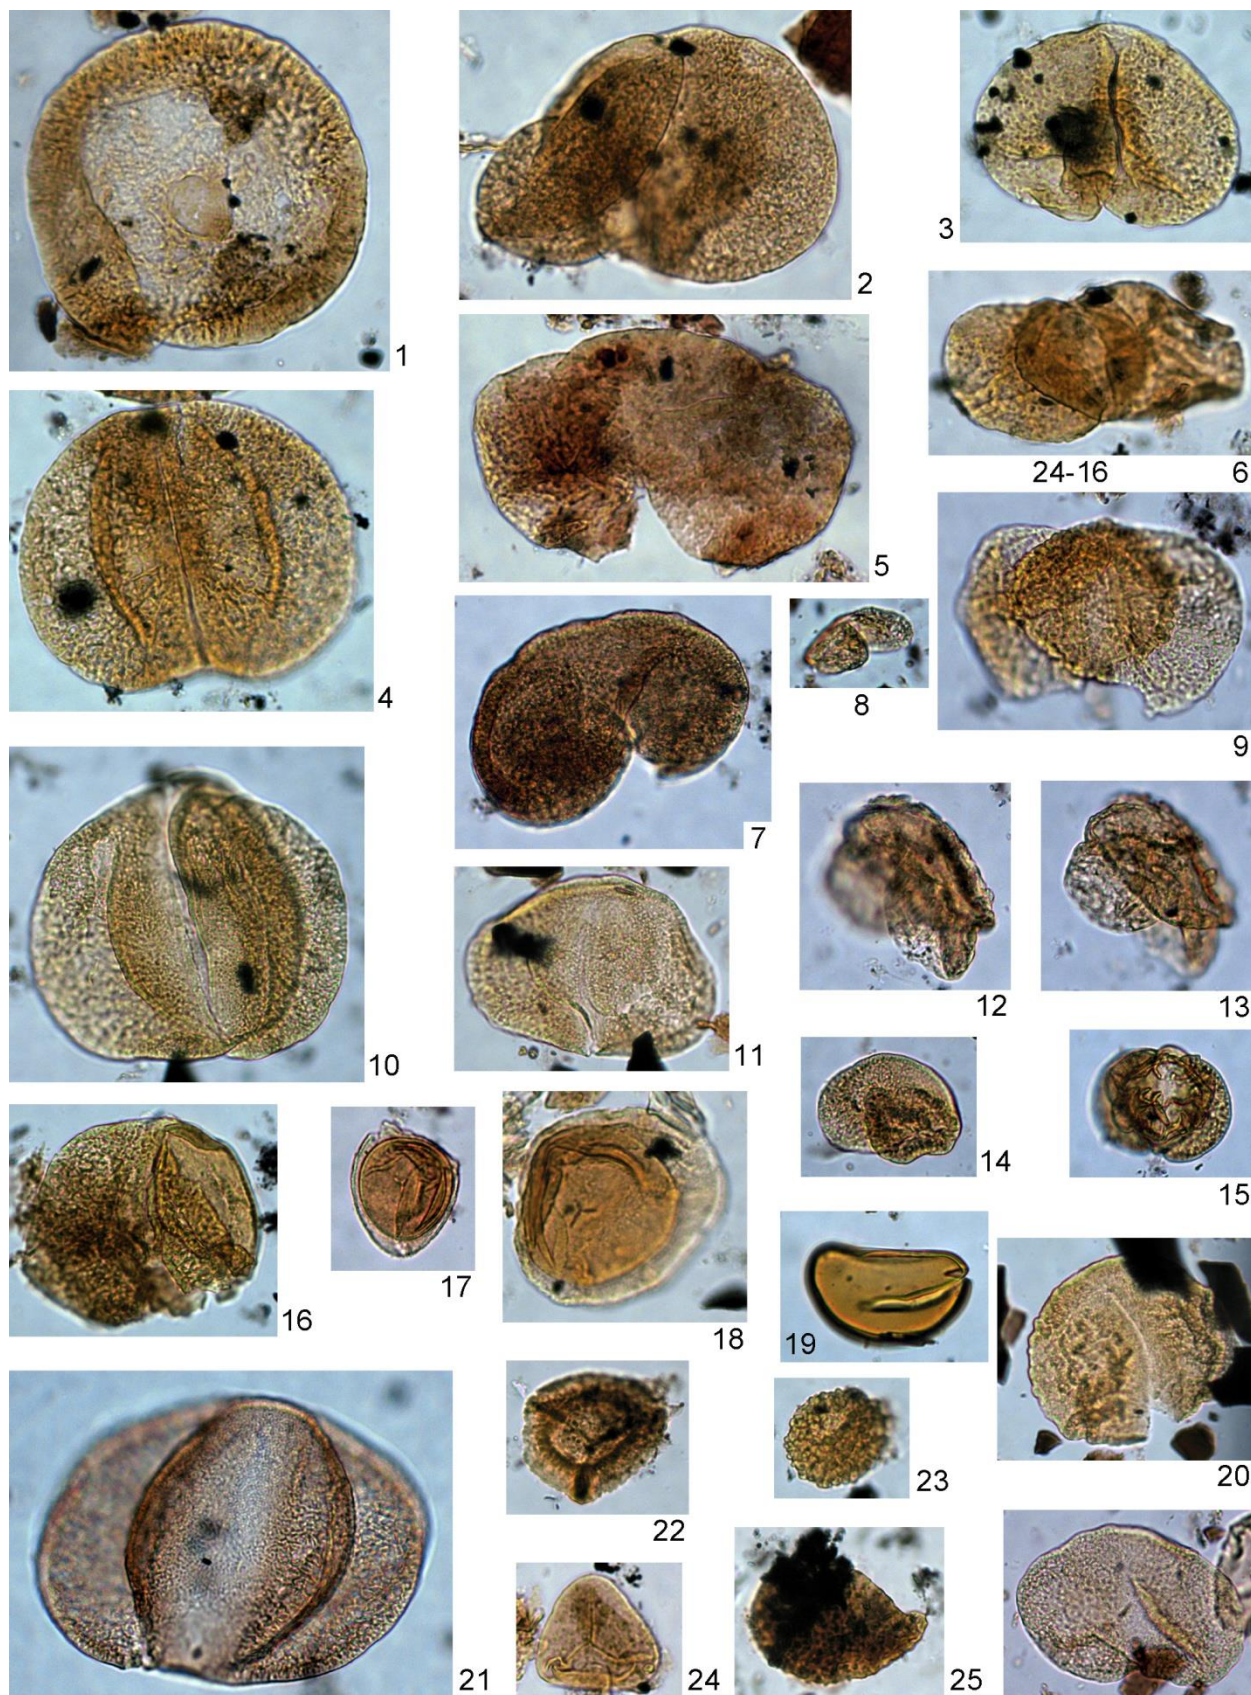

**Table 7.** **1** – *Cordaitina* sp., sample 24V14-16; **2** – *Piceapollenites* sp., sample 14V14-23; **3** – *Disaccites*, sample 14V14-23; **4** – *Alisporites* sp., sample 24V14-16; **5** – *Piceapollenites* sp., sample 14V14-23; **6** – *Podocarpidites* sp., sample 24V14-16; **7** – *Cedripites* sp., sample 14V14-23; **8** – *Pinus minimus* Zakl, sample 14V14-23; **9** – *Podocarpidites* sp., sample 24V14-25; **10** – *Alisporites* sp., sample

24V14-25; **11** – *Piceapollenites* sp., sample 14V14-23; **12-13** – *Pinuspollenites* sp., sample 24V14-25; **14** – *Cedripites* sp., sample 14V14-23; **15** – *Pinus* cf. *aralica* Bolkh., sample 14V14-23; **16** – Disaccites, sample 24V14-25; **17-18** – Salviniaceae, sample 24V14-16 ; **19** – *Laevigatosporites* sp., sample 14V14-23; **20** – Disaccites, sample 14V14-23; **21** – *Alisporites* sp., sample 14V14-23; **22, 25** – неопределенные споры ; **23** – *Cerebropollenites mesozoicus* (Couper) Nilsson, sample 24V14-25; **24** - *Leiotriletes-Coniopteris* group, sample 24V14-25; **26** – Disaccites, sample 14V14-23. Magnification x500..
