# Supplementary material
Source: publisher figshare collection journal article supplement (https://tandf.figshare.com/articles/dataset/_/20431288)
Supplement: Supplementary file 3 [file 1]

14AP15

|        |                        | CONCENTRATIONS <sup>a</sup> |            |          |            |          |            | RATIOS            |                                                  |                         |                                                  |                         |                     | AGES                                              |                         |                                                  |                         |                                                  |                         |                                                   |                         |
|--------|------------------------|-----------------------------|------------|----------|------------|----------|------------|-------------------|--------------------------------------------------|-------------------------|--------------------------------------------------|-------------------------|---------------------|---------------------------------------------------|-------------------------|--------------------------------------------------|-------------------------|--------------------------------------------------|-------------------------|---------------------------------------------------|-------------------------|
| Sample | Analysis               | U [ppm]                     | 2 $\sigma$ | Th [ppm] | 2 $\sigma$ | Pb [ppm] | 2 $\sigma$ | U/Th <sup>a</sup> | <sup>207</sup> Pb/ <sup>235</sup> U <sup>b</sup> | 2 $\sigma$ <sup>d</sup> | <sup>206</sup> Pb/ <sup>238</sup> U <sup>b</sup> | 2 $\sigma$ <sup>d</sup> | $\rho$ <sup>c</sup> | <sup>207</sup> Pb/ <sup>206</sup> Pb <sup>e</sup> | 2 $\sigma$ <sup>d</sup> | <sup>207</sup> Pb/ <sup>235</sup> U <sup>b</sup> | 2 $\sigma$ <sup>d</sup> | <sup>206</sup> Pb/ <sup>238</sup> U <sup>b</sup> | 2 $\sigma$ <sup>d</sup> | <sup>207</sup> Pb/ <sup>206</sup> Pb <sup>e</sup> | 2 $\sigma$ <sup>d</sup> |
| 14AP15 | Zircon_Sample-118.FIN2 | 1566                        | 41         | 607      | 14         | 31       | 1          | 2.5               | 0.133                                            | 0.005                   | 0.018                                            | 0.000                   | 0.421               | 0.0525                                            | 0.0020                  | 126.4                                            | 4.3                     | 116.1                                            | 1.8                     | 301                                               | 89                      |
| 14AP15 | Zircon_sample-011.FIN2 | 940                         | 190        | 482      | 92         | 25       | 4          | 1.8               | 0.129                                            | 0.003                   | 0.018                                            | 0.000                   | 0.227               | 0.0511                                            | 0.0013                  | 122.9                                            | 3                       | 116.43                                           | 0.94                    | 255                                               | 54                      |
| 14AP15 | Zircon_Sample-169.FIN2 | 291                         | 14         | 651      | 53         | 43       | 5          | 0.4               | 0.167                                            | 0.011                   | 0.023                                            | 0.000                   | 0.252               | 0.0516                                            | 0.0033                  | 156.7                                            | 9.5                     | 149.1                                            | 2.6                     | 260                                               | 140                     |
| 14AP15 | Zircon_Sample-075.FIN2 | 427                         | 12         | 316      | 7          | 21       | 1          | 1.6               | 0.182                                            | 0.009                   | 0.023                                            | 0.000                   | 0.194               | 0.0555                                            | 0.0029                  | 169.3                                            | 8                       | 149.4                                            | 1                       | 430                                               | 120                     |
| 14AP15 | Zircon_Sample-209.FIN2 | 315                         | 26         | 409      | 54         | 27       | 3          | 0.8               | 0.169                                            | 0.008                   | 0.024                                            | 0.000                   | 0.061               | 0.0503                                            | 0.0023                  | 158.8                                            | 7.3                     | 155.5                                            | 2.5                     | 200                                               | 100                     |
| 14AP15 | Zircon_Sample-047.FIN2 | 138                         | 12         | 164      | 7          | 10       | 0          | 0.9               | 0.214                                            | 0.010                   | 0.026                                            | 0.001                   | 0.231               | 0.0591                                            | 0.0034                  | 196.5                                            | 8.3                     | 167                                              | 4.6                     | 560                                               | 120                     |
| 14AP15 | Zircon_Sample-196.FIN2 | 399                         | 19         | 204      | 14         | 16       | 1          | 1.8               | 0.183                                            | 0.004                   | 0.026                                            | 0.000                   | 0.047               | 0.0517                                            | 0.0017                  | 170.5                                            | 3.6                     | 167.1                                            | 2.5                     | 266                                               | 76                      |
| 14AP15 | Zircon_Sample-103.FIN2 | 518                         | 23         | 442      | 13         | 41       | 1          | 1.2               | 0.227                                            | 0.007                   | 0.031                                            | 0.000                   | 0.279               | 0.0524                                            | 0.0014                  | 207.6                                            | 6                       | 196                                              | 2                       | 298                                               | 62                      |
| 14AP15 | Zircon_Sample-049.FIN2 | 239                         | 17         | 140      | 10         | 14       | 1          | 2.0               | 0.256                                            | 0.011                   | 0.036                                            | 0.000                   | 0.386               | 0.0512                                            | 0.0021                  | 231.2                                            | 8.9                     | 228.5                                            | 2.4                     | 242                                               | 95                      |
| 14AP15 | Zircon_Sample-101.FIN2 | 306                         | 43         | 259      | 63         | 30       | 7          | 1.4               | 0.298                                            | 0.008                   | 0.040                                            | 0.000                   | 0.644               | 0.0535                                            | 0.0013                  | 264.5                                            | 6.2                     | 251.9                                            | 2.5                     | 344                                               | 54                      |
| 14AP15 | Zircon_Sample-143.FIN2 | 406                         | 16         | 273      | 6          | 31       | 1          | 1.4               | 0.286                                            | 0.008                   | 0.040                                            | 0.000                   | 0.267               | 0.0515                                            | 0.0014                  | 255.5                                            | 6.4                     | 253                                              | 2.4                     | 258                                               | 64                      |
| 14AP15 | Zircon_Sample-061.FIN2 | 517                         | 18         | 332      | 14         | 36       | 1          | 1.9               | 0.296                                            | 0.010                   | 0.040                                            | 0.001                   | 0.189               | 0.0528                                            | 0.0022                  | 263                                              | 7.8                     | 254.7                                            | 3.4                     | 311                                               | 94                      |
| 14AP15 | Zircon_Sample-063.FIN2 | 119                         | 5          | 76       | 2          | 9        | 0          | 1.8               | 0.313                                            | 0.018                   | 0.042                                            | 0.000                   | 0.210               | 0.0538                                            | 0.0030                  | 276                                              | 14                      | 263.9                                            | 2.9                     | 340                                               | 120                     |
| 14AP15 | Zircon_Sample-066.FIN2 | 137                         | 8          | 165      | 8          | 20       | 1          | 1.0               | 0.354                                            | 0.023                   | 0.043                                            | 0.001                   | 0.615               | 0.0583                                            | 0.0029                  | 307                                              | 17                      | 271.8                                            | 5                       | 560                                               | 120                     |
| 14AP15 | Zircon_Sample-052.FIN2 | 151                         | 11         | 247      | 11         | 27       | 1          | 0.7               | 0.322                                            | 0.017                   | 0.044                                            | 0.001                   | 0.365               | 0.0530                                            | 0.0029                  | 283                                              | 13                      | 277.2                                            | 6.3                     | 320                                               | 120                     |
| 14AP15 | Zircon_Sample-088.FIN2 | 330                         | 41         | 417      | 44         | 53       | 5          | 0.9               | 0.361                                            | 0.007                   | 0.048                                            | 0.000                   | 0.015               | 0.0532                                            | 0.0012                  | 313.2                                            | 5.3                     | 305.2                                            | 2.8                     | 334                                               | 51                      |
| 14AP15 | Zircon_Sample-048.FIN2 | 186                         | 10         | 157      | 10         | 21       | 1          | 1.3               | 0.371                                            | 0.013                   | 0.050                                            | 0.001                   | 0.292               | 0.0532                                            | 0.0022                  | 320.3                                            | 9.9                     | 313.3                                            | 4                       | 354                                               | 85                      |
| 14AP15 | Zircon_sample-020.FIN2 | 284                         | 26         | 191      | 15         | 26       | 1          | 1.5               | 0.390                                            | 0.022                   | 0.051                                            | 0.001                   | 0.848               | 0.0552                                            | 0.0022                  | 334                                              | 16                      | 321.2                                            | 6.7                     | 416                                               | 90                      |
| 14AP15 | Zircon_Sample-129.FIN2 | 207                         | 6          | 347      | 14         | 51       | 2          | 0.6               | 0.397                                            | 0.022                   | 0.051                                            | 0.001                   | 0.214               | 0.0553                                            | 0.0031                  | 339                                              | 16                      | 322.3                                            | 4.8                     | 410                                               | 120                     |
| 14AP15 | Zircon_Sample-179.FIN2 | 346                         | 11         | 478      | 13         | 67       | 2          | 0.6               | 0.377                                            | 0.012                   | 0.051                                            | 0.000                   | 0.282               | 0.0533                                            | 0.0016                  | 324.6                                            | 8.5                     | 322.5                                            | 2.1                     | 334                                               | 67                      |
| 14AP15 | Zircon_Sample-079.FIN2 | 359                         | 14         | 195      | 12         | 31       | 2          | 2.1               | 0.428                                            | 0.015                   | 0.057                                            | 0.001                   | 0.400               | 0.0554                                            | 0.0010                  | 362                                              | 11                      | 354.6                                            | 7.4                     | 427                                               | 42                      |
| 14AP15 | Zircon_Sample-127.FIN2 | 265                         | 5          | 213      | 21         | 34       | 3          | 1.2               | 0.421                                            | 0.013                   | 0.057                                            | 0.001                   | 0.031               | 0.0539                                            | 0.0020                  | 356.9                                            | 9.4                     | 355.5                                            | 4.4                     | 362                                               | 81                      |
| 14AP15 | Zircon_Sample-144.FIN2 | 914                         | 42         | 221      | 40         | 37       | 6          | 4.5               | 0.428                                            | 0.005                   | 0.057                                            | 0.001                   | 0.665               | 0.0547                                            | 0.0005                  | 361.4                                            | 3.8                     | 357                                              | 3.9                     | 401                                               | 19                      |
| 14AP15 | Zircon_Sample-073.FIN2 | 733                         | 56         | 806      | 83         | 138      | 13         | 1.1               | 0.486                                            | 0.006                   | 0.062                                            | 0.000                   | 0.468               | 0.0566                                            | 0.0010                  | 402.4                                            | 3.9                     | 386.4                                            | 2.1                     | 475                                               | 37                      |
| 14AP15 | Zircon_Sample-111.FIN2 | 230                         | 39         | 211      | 59         | 37       | 9          | 1.2               | 0.466                                            | 0.018                   | 0.062                                            | 0.001                   | 0.418               | 0.0538                                            | 0.0021                  | 388                                              | 12                      | 389.7                                            | 5.7                     | 357                                               | 88                      |
| 14AP15 | Zircon_Sample-157.FIN2 | 535                         | 95         | 118      | 23         | 23       | 4          | 4.2               | 0.546                                            | 0.026                   | 0.071                                            | 0.001                   | 0.839               | 0.0557                                            | 0.0021                  | 442                                              | 17                      | 440.6                                            | 8.2                     | 437                                               | 83                      |
| 14AP15 | Zircon_Sample-051.FIN2 | 1064                        | 81         | 549      | 65         | 103      | 8          | 2.2               | 0.594                                            | 0.012                   | 0.075                                            | 0.001                   | 0.302               | 0.0576                                            | 0.0014                  | 473.6                                            | 7.8                     | 463.4                                            | 5.7                     | 514                                               | 56                      |
| 14AP15 | Zircon_Sample-131.FIN2 | 96                          | 6          | 75       | 9          | 18       | 2          | 1.2               | 0.714                                            | 0.018                   | 0.086                                            | 0.001                   | 0.014               | 0.0590                                            | 0.0017                  | 547                                              | 11                      | 529.5                                            | 7.5                     | 614                                               | 65                      |
| 14AP15 | Zircon_Sample-191.FIN2 | 146                         | 11         | 104      | 13         | 26       | 3          | 1.3               | 0.711                                            | 0.030                   | 0.089                                            | 0.001                   | 0.130               | 0.0584                                            | 0.0025                  | 545                                              | 17                      | 547.3                                            | 4.8                     | 538                                               | 93                      |
| 14AP15 | Zircon_Sample-124.FIN2 | 113                         | 6          | 80       | 4          | 20       | 1          | 1.3               | 0.723                                            | 0.030                   | 0.090                                            | 0.001                   | 0.675               | 0.0585                                            | 0.0023                  | 557                                              | 20                      | 555.1                                            | 6.9                     | 543                                               | 83                      |
| 14AP15 | Zircon_Sample-114.FIN2 | 264                         | 18         | 257      | 10         | 64       | 2          | 1.0               | 0.733                                            | 0.025                   | 0.090                                            | 0.001                   | 0.584               | 0.0583                                            | 0.0016                  | 558                                              | 14                      | 557.3                                            | 6                       | 539                                               | 60                      |
| 14AP15 | Zircon_Sample-086.FIN2 | 646                         | 26         | 432      | 14         | 113      | 3          | 1.7               | 0.849                                            | 0.016                   | 0.095                                            | 0.002                   | 0.809               | 0.0645                                            | 0.0010                  | 624                                              | 8.9                     | 584.1                                            | 9.1                     | 757                                               | 31                      |
| 14AP15 | Zircon_Sample-112.FIN2 | 115                         | 3          | 62       | 4          | 17       | 1          | 1.9               | 0.798                                            | 0.028                   | 0.096                                            | 0.001                   | 0.103               | 0.0598                                            | 0.0021                  | 595                                              | 16                      | 592.6                                            | 4.4                     | 589                                               | 76                      |
| 14AP15 | Zircon_Sample-167.FIN2 | 238                         | 22         | 91       | 12         | 25       | 2          | 2.3               | 0.824                                            | 0.042                   | 0.097                                            | 0.001                   | 0.357               | 0.0620                                            | 0.0030                  | 609                                              | 23                      | 594.7                                            | 8.3                     | 660                                               | 100                     |
| 14AP15 | Zircon_Sample-164.FIN2 | 308                         | 28         | 166      | 31         | 48       | 7          | 2.4               | 0.896                                            | 0.020                   | 0.103                                            | 0.001                   | 0.287               | 0.0630                                            | 0.0015                  | 650                                              | 10                      | 634.1                                            | 4.7                     | 706                                               | 51                      |
| 14AP15 | Zircon_sample-023.FIN2 | 540                         | 51         | 78       | 12         | 23       | 4          | 7.2               | 0.907                                            | 0.019                   | 0.105                                            | 0.002                   | 0.503               | 0.0626                                            | 0.0013                  | 656                                              | 10                      | 645                                              | 11                      | 695                                               | 43                      |
| 14AP15 | Zircon_sample-021.FIN2 | 188                         | 9          | 196      | 9          | 53       | 3          | 1.0               | 0.991                                            | 0.028                   | 0.113                                            | 0.002                   | 0.401               | 0.0635                                            | 0.0016                  | 699                                              | 15                      | 690                                              | 8.8                     | 741                                               | 46                      |
| 14AP15 | Zircon_Sample-181.FIN2 | 218                         | 20         | 123      | 20         | 41       | 6          | 1.6               | 0.994                                            | 0.022                   | 0.115                                            | 0.001                   | 0.390               | 0.0630                                            | 0.0014                  | 700                                              | 11                      | 699.4                                            | 6.5                     | 707                                               | 48                      |
| 14AP15 | Zircon_Sample-092.FIN2 | 314                         | 21         | 117      | 12         | 45       | 5          | 3.0               | 1.122                                            | 0.032                   | 0.120                                            | 0.001                   | 0.704               | 0.0672                                            | 0.0016                  | 764                                              | 15                      | 730.8                                            | 5.2                     | 843                                               | 49                      |
| 14AP15 | Zircon_Sample-208.FIN2 | 91                          | 5          | 85       | 8          | 30       | 3          | 1.2               | 1.120                                            | 0.027                   | 0.127                                            | 0.002                   | 0.279               | 0.0646                                            | 0.0013                  | 763                                              | 13                      | 770.6                                            | 9.8                     | 758                                               | 44                      |
| 14AP15 | Zircon_Sample-104.FIN2 | 126                         | 7          | 98       | 6          | 35       | 2          | 1.3               | 1.192                                            | 0.027                   | 0.127                                            | 0.001                   | 0.434               | 0.0669                                            | 0.0017                  | 797                                              | 13                      | 773.1                                            | 5.8                     | 833                                               | 54                      |
| 14AP15 | Zircon_Sample-126.FIN2 | 158                         | 7          | 128      | 7          | 46       | 2          | 1.2               | 1.163                                            | 0.028                   | 0.128                                            | 0.001                   | 0.472               | 0.0659                                            | 0.0014                  | 783                                              | 13                      | 775                                              | 6.8                     | 815                                               | 51                      |
| 14AP15 | Zircon_Sample-099.FIN2 | 198                         | 8          | 219      | 35         | 87       | 12         | 1.1               | 1.268                                            | 0.021                   | 0.135                                            | 0.001                   | 0.381               | 0.0674                                            | 0.0012                  | 831.4                                            | 9.3                     | 817.3                                            | 7.7                     | 861                                               | 29                      |
| 14AP15 | Zircon_sample-024.FIN2 | 187                         | 4          | 94       | 4          | 36       | 3          | 2.0               | 1.290                                            | 0.042                   | 0.139                                            | 0.002                   | 0.490               | 0.0667                                            | 0.0017                  | 848                                              | 22                      | 840.8                                            | 8.8                     | 825                                               | 55                      |
| 14AP15 | Zircon_Sample-090.FIN2 | 414                         | 11         | 433      | 41         | 157      | 13         | 1.1               | 1.311                                            | 0.016                   | 0.141                                            | 0.001                   | 0.523               | 0.0671                                            | 0.0008                  | 850.5                                            | 7                       | 848.5                                            | 7.9                     | 840                                               | 25                      |
| 14AP15 | Zircon_Sample-050.FIN2 | 451                         | 35         | 111      | 9          | 49       | 5          | 4.6               | 1.474                                            | 0.038                   | 0.152                                            | 0.001                   | 0.753               | 0.0689                                            | 0.0009                  | 920                                              | 15                      | 913                                              | 6.8                     | 894                                               | 25                      |
| 14AP15 | Zircon_Sample-151.FIN2 | 129                         | 9          | 72       | 10         | 33       | 4          | 1.7               | 1.645                                            | 0.035                   | 0.168                                            | 0.002                   | 0.525               | 0.0714                                            | 0.0015                  | 987                                              | 13                      | 1000                                             | 13                      | 966                                               | 41                      |
| 14AP15 | Zircon_Sample-155.FIN2 | 133                         | 3          | 72       | 2          | 34       | 1          | 1.7               | 1.777                                            | 0.029                   | 0.174                                            | 0.001                   | 0.335               | 0.0727                                            | 0.0007                  | 1037                                             | 11                      | 1035                                             | 7.7                     | 1006                                              | 20                      |
| 14AP15 | Zircon_Sample-060.FIN2 | 66                          | 5          | 32       | 2          | 16       | 1          | 2.4               | 2.093                                            | 0.034                   | 0.197                                            | 0.002                   | 0.294               | 0.0771                                            | 0.0016                  | 1146                                             | 11                      | 1157                                             | 11                      | 1121                                              | 41                      |
| 14AP15 | Zircon_Sample-166.FIN2 | 229                         | 14         | 94       | 8          | 48       | 4          | 2.2               | 2.230                                            | 0.070                   | 0.198                                            | 0.002                   | 0.659               | 0.0822                                            | 0.0051                  | 1187                                             | 51                      | 1166                                             | 11                      | 1240                                              | 120                     |
| 14AP15 | Zircon_Sample-076.FIN2 | 340                         | 31         | 145      | 6          | 68       | 4          | 2.8               | 2.509                                            | 0.060                   | 0.204                                            | 0.004                   | 0.834               | 0.0889                                            | 0.0010                  | 1274                                             | 18                      | 1197                                             | 23                      | 1401                                              | 23                      |
| 14AP15 | Zircon_sample-036.FIN2 | 181                         | 42         | 178      | 62         | 88       | 25         | 1.3               | 2.160                                            | 0.100                   | 0.204                                            | 0.008                   | 0.877               | 0.0768                                            | 0.0010                  | 1166                                             | 32                      | 1198                                             | 42                      | 1115                                              | 27                      |
| 14AP15 | Zircon_sample-040.FIN2 | 80                          | 3          | 71       | 3          | 36       | 2          | 1.2               | 2.303                                            | 0.042                   | 0.205                                            | 0.001                   | 0.704               | 0.0822                                            | 0.0007                  | 1213                                             | 13                      | 1201.5                                           | 4.9                     | 1250                                              | 16                      |
| 14AP15 | Zircon_Sample-141.FIN2 | 78                          | 6          | 47       | 6          | 35       | 5          | 1.5               | 2.900                                            | 0.140                   | 0.211                                            | 0.008                   | 0.829               | 0.0989                                            | 0.0025                  | 1391                                             | 34                      | 1234                                             | 42                      | 1601                                              | 47                      |
| 14AP15 | Zircon_Sample-152.FIN2 | 304                         | 9          | 51       | 3          | 42       | 3          | 5.5               | 3.380                                            | 0.140                   | 0.244                                            | 0.008                   | 0.962               | 0.1005                                            | 0.0011                  | 1499                                             | 34                      | 1407                                             | 42                      | 1632                                              | 20                      |
| 14AP15 | Zircon_Sample-177.FIN2 | 1860                        | 140        | 186      | 51         | 80       | 8          | 9.8               | 4.010                                            | 0.220                   | 0.245                                            | 0.011                   | 0.964               | 0.1178                                            | 0.0013                  | 1632                                             | 44                      | 1411                                             | 58                      | 1923                                              | 20                      |
| 14AP15 | Zircon_Sample-205.FIN2 | 260                         | 15         | 97       | 8          | 65       | 3          | 2.7               | 3.184                                            | 0.031                   | 0.245                                            | 0.005                   | 0.689               | 0.0948                                            | 0.0009                  | 1453.2                                           | 7.6                     | 1412                                             | 26                      | 1524                                              | 18                      |
| 14AP15 | Zircon_sample-022.FIN2 | 187                         | 29         | 125      | 23         | 89       | 16         | 1.4               | 3.096                                            | 0.048                   | 0.250                                            | 0.004                   | 0.717               | 0.0901                                            | 0.0011                  | 1431                                             | 12                      | 1438                                             | 20                      | 1427                                              | 24                      |
| 14AP15 | Zircon_sample-027.FIN2 | 480                         | 23         | 262      | 14         | 172      | 9          | 1.9               | 3.370                                            |                         |                                                  |                         |                     |                                                   |                         |                                                  |                         |                                                  |                         |                                                   |                         |

|                                  |                        |     |     |     |    |     |    |      |        |       |       |       |       |        |        |        |     |      |     |        |     |
|----------------------------------|------------------------|-----|-----|-----|----|-----|----|------|--------|-------|-------|-------|-------|--------|--------|--------|-----|------|-----|--------|-----|
| 14AP15                           | Zircon_Sample-102.FIN2 | 211 | 9   | 136 | 7  | 119 | 5  | 1.6  | 5.221  | 0.042 | 0.332 | 0.003 | 0.534 | 0.1134 | 0.0012 | 1855.9 | 6.9 | 1850 | 15  | 1854   | 19  |
| 14AP15                           | Zircon_Sample-156.FIN2 | 191 | 20  | 101 | 11 | 85  | 8  | 1.8  | 5.043  | 0.077 | 0.333 | 0.004 | 0.743 | 0.1094 | 0.0013 | 1826   | 13  | 1852 | 19  | 1794   | 20  |
| 14AP15                           | Zircon_sample-008.FIN2 | 351 | 14  | 135 | 8  | 117 | 5  | 2.5  | 5.540  | 0.200 | 0.333 | 0.008 | 0.971 | 0.1208 | 0.0016 | 1905   | 31  | 1858 | 37  | 1967   | 24  |
| 14AP15                           | Zircon_Sample-105.FIN2 | 118 | 5   | 48  | 2  | 42  | 2  | 2.6  | 5.507  | 0.070 | 0.336 | 0.003 | 0.604 | 0.1170 | 0.0013 | 1902   | 11  | 1867 | 13  | 1910   | 20  |
| 14AP15                           | Zircon_Sample-113.FIN2 | 298 | 32  | 117 | 7  | 105 | 4  | 2.6  | 5.540  | 0.110 | 0.341 | 0.007 | 0.878 | 0.1176 | 0.0012 | 1907   | 17  | 1891 | 32  | 1920   | 19  |
| 14AP15                           | Zircon_Sample-138.FIN2 | 191 | 8   | 262 | 8  | 230 | 4  | 0.7  | 5.602  | 0.075 | 0.343 | 0.003 | 0.791 | 0.1173 | 0.0014 | 1916   | 11  | 1903 | 17  | 1915   | 22  |
| 14AP15                           | Zircon_sample-014.FIN2 | 840 | 63  | 76  | 25 | 77  | 20 | 10.0 | 5.549  | 0.075 | 0.344 | 0.004 | 0.990 | 0.1170 | 0.0010 | 1908   | 12  | 1904 | 20  | 1911   | 16  |
| 14AP15                           | Zircon_Sample-089.FIN2 | 476 | 57  | 235 | 57 | 205 | 47 | 2.5  | 5.762  | 0.070 | 0.344 | 0.002 | 0.605 | 0.1204 | 0.0010 | 1941   | 11  | 1907 | 12  | 1962   | 15  |
| 14AP15                           | Zircon_sample-013.FIN2 | 260 | 43  | 81  | 10 | 74  | 9  | 2.7  | 5.602  | 0.054 | 0.348 | 0.003 | 0.899 | 0.1163 | 0.0008 | 1916.3 | 8.2 | 1925 | 15  | 1899   | 13  |
| 14AP15                           | Zircon_Sample-065.FIN2 | 408 | 19  | 195 | 8  | 165 | 6  | 2.4  | 5.640  | 0.160 | 0.349 | 0.006 | 0.836 | 0.1168 | 0.0014 | 1921   | 25  | 1928 | 29  | 1907   | 21  |
| 14AP15                           | Zircon_Sample-203.FIN2 | 249 | 35  | 30  | 3  | 29  | 2  | 8.0  | 5.990  | 0.130 | 0.355 | 0.008 | 0.988 | 0.1230 | 0.0008 | 1974   | 19  | 1958 | 36  | 2000   | 12  |
| 14AP15                           | Zircon_Sample-170.FIN2 | 292 | 66  | 125 | 29 | 107 | 22 | 2.3  | 6.170  | 0.210 | 0.357 | 0.011 | 0.968 | 0.1253 | 0.0010 | 1999   | 30  | 1969 | 53  | 2033   | 15  |
| 14AP15                           | Zircon_Sample-192.FIN2 | 102 | 3   | 41  | 1  | 38  | 2  | 2.2  | 6.420  | 0.130 | 0.372 | 0.008 | 0.587 | 0.1247 | 0.0027 | 2035   | 17  | 2037 | 40  | 2023   | 39  |
| 14AP15                           | Zircon_Sample-202.FIN2 | 435 | 50  | 133 | 14 | 125 | 9  | 3.2  | 6.380  | 0.100 | 0.373 | 0.006 | 0.863 | 0.1237 | 0.0011 | 2028   | 14  | 2043 | 29  | 2010   | 16  |
| 14AP15                           | Zircon_Sample-165.FIN2 | 104 | 2   | 42  | 1  | 39  | 1  | 2.3  | 6.466  | 0.090 | 0.375 | 0.005 | 0.793 | 0.1248 | 0.0014 | 2041   | 12  | 2051 | 21  | 2025   | 20  |
| 14AP15                           | Zircon_Sample-053.FIN2 | 108 | 5   | 60  | 6  | 54  | 6  | 2.1  | 6.630  | 0.150 | 0.382 | 0.006 | 0.841 | 0.1262 | 0.0014 | 2062   | 20  | 2084 | 29  | 2045   | 20  |
| 14AP15                           | Zircon_sample-046.FIN2 | 276 | 14  | 119 | 5  | 112 | 3  | 2.5  | 6.720  | 0.300 | 0.384 | 0.016 | 0.987 | 0.1262 | 0.0010 | 2072   | 42  | 2092 | 76  | 2045   | 14  |
| 14AP15                           | Zircon_sample-010.FIN2 | 610 | 200 | 108 | 16 | 101 | 15 | 4.7  | 6.790  | 0.200 | 0.386 | 0.010 | 0.882 | 0.1269 | 0.0014 | 2083   | 26  | 2102 | 46  | 2056   | 19  |
| 14AP15                           | Zircon_Sample-193.FIN2 | 283 | 27  | 7   | 2  | 9   | 2  | 40.0 | 6.370  | 0.310 | 0.387 | 0.019 | 0.984 | 0.1192 | 0.0013 | 2025   | 40  | 2107 | 85  | 1944   | 20  |
| 14AP15                           | Zircon_sample-038.FIN2 | 113 | 10  | 135 | 10 | 126 | 8  | 1.1  | 7.090  | 0.250 | 0.396 | 0.012 | 0.886 | 0.1267 | 0.0022 | 2121   | 31  | 2150 | 55  | 2051   | 31  |
| 14AP15                           | Zircon_Sample-059.FIN2 | 103 | 34  | 39  | 15 | 35  | 12 | 4.7  | 6.860  | 0.430 | 0.403 | 0.023 | 0.962 | 0.1213 | 0.0016 | 2088   | 54  | 2180 | 110 | 1974   | 24  |
| 14AP15                           | Zircon_sample-037.FIN2 | 907 | 85  | 407 | 99 | 401 | 72 | 2.8  | 8.810  | 0.240 | 0.428 | 0.009 | 0.792 | 0.1487 | 0.0025 | 2317   | 25  | 2297 | 42  | 2330   | 29  |
| 14AP15                           | Zircon_Sample-190.FIN2 | 406 | 14  | 305 | 21 | 352 | 25 | 1.2  | 10.890 | 0.190 | 0.465 | 0.011 | 0.891 | 0.1702 | 0.0018 | 2513   | 16  | 2463 | 47  | 2560   | 18  |
| 14AP15                           | Zircon_Sample-195.FIN2 | 333 | 53  | 147 | 27 | 179 | 29 | 2.0  | 10.790 | 0.330 | 0.469 | 0.012 | 0.899 | 0.1679 | 0.0023 | 2505   | 29  | 2477 | 53  | 2536   | 23  |
| 14AP15                           | Zircon_Sample-183.FIN2 | 47  | 8   | 22  | 4  | 27  | 6  | 2.0  | 11.630 | 0.400 | 0.473 | 0.020 | 0.955 | 0.1756 | 0.0014 | 2574   | 31  | 2497 | 88  | 2612   | 14  |
| 14AP15                           | Zircon_Sample-116.FIN2 | 424 | 32  | 197 | 17 | 233 | 13 | 2.1  | 10.900 | 0.240 | 0.474 | 0.007 | 0.945 | 0.1682 | 0.0014 | 2514   | 21  | 2499 | 30  | 2539   | 14  |
| 14AP15                           | Zircon_Sample-194.FIN2 | 58  | 1   | 89  | 5  | 108 | 6  | 0.6  | 11.450 | 0.100 | 0.481 | 0.005 | 0.014 | 0.1728 | 0.0019 | 2560.6 | 8.4 | 2532 | 24  | 2584   | 19  |
| 14AP15                           | Zircon_Sample-153.FIN2 | 551 | 29  | 388 | 41 | 462 | 51 | 1.3  | 12.180 | 0.210 | 0.483 | 0.008 | 0.918 | 0.1814 | 0.0011 | 2618   | 16  | 2538 | 33  | 2665.7 | 9.7 |
| 14AP15                           | Zircon_Sample-163.FIN2 | 548 | 21  | 165 | 3  | 192 | 7  | 2.9  | 12.710 | 0.270 | 0.486 | 0.010 | 0.938 | 0.1882 | 0.0012 | 2658   | 20  | 2553 | 44  | 2727   | 10  |
| 14AP15                           | Zircon_Sample-100.FIN2 | 400 | 98  | 195 | 28 | 241 | 31 | 2.2  | 13.430 | 0.320 | 0.486 | 0.010 | 0.931 | 0.1995 | 0.0017 | 2710   | 23  | 2555 | 42  | 2822   | 14  |
| 14AP15                           | Zircon_sample-007.FIN2 | 433 | 17  | 233 | 12 | 297 | 11 | 1.8  | 12.060 | 0.170 | 0.488 | 0.006 | 0.839 | 0.1792 | 0.0010 | 2609   | 13  | 2564 | 25  | 2645.7 | 9.6 |
| 14AP15                           | Zircon_Sample-130.FIN2 | 322 | 22  | 255 | 19 | 312 | 25 | 1.2  | 12.900 | 0.200 | 0.499 | 0.005 | 0.689 | 0.1857 | 0.0018 | 2672   | 15  | 2607 | 23  | 2704   | 16  |
| 14AP15                           | Zircon_Sample-085.FIN2 | 76  | 3   | 66  | 2  | 81  | 2  | 1.3  | 12.940 | 0.190 | 0.505 | 0.008 | 0.774 | 0.1855 | 0.0021 | 2675   | 14  | 2634 | 34  | 2702   | 19  |
| 14AP15                           | Zircon_Sample-206.FIN2 | 80  | 5   | 44  | 3  | 53  | 2  | 1.8  | 12.890 | 0.260 | 0.510 | 0.009 | 0.766 | 0.1841 | 0.0018 | 2671   | 19  | 2655 | 38  | 2690   | 16  |
| 14AP15                           | Zircon_Sample-204.FIN2 | 172 | 12  | 103 | 6  | 126 | 6  | 1.7  | 12.790 | 0.250 | 0.515 | 0.010 | 0.868 | 0.1822 | 0.0014 | 2664   | 19  | 2676 | 41  | 2673   | 13  |
| 14AP15                           | Zircon_Sample-074.FIN2 | 308 | 33  | 382 | 53 | 478 | 62 | 1.0  | 13.160 | 0.180 | 0.519 | 0.007 | 0.828 | 0.1841 | 0.0013 | 2691   | 13  | 2694 | 31  | 2690   | 12  |
| 14AP15                           | Zircon_Sample-115.FIN2 | 396 | 36  | 183 | 54 | 240 | 73 | 3.0  | 13.110 | 0.110 | 0.520 | 0.006 | 0.762 | 0.1811 | 0.0017 | 2687.7 | 8   | 2699 | 25  | 2663   | 15  |
| 14AP15                           | Zircon_Sample-078.FIN2 | 218 | 13  | 122 | 30 | 141 | 33 | 2.5  | 13.870 | 0.200 | 0.523 | 0.007 | 0.750 | 0.1904 | 0.0019 | 2740   | 13  | 2711 | 30  | 2745   | 17  |
| 14AP15                           | Zircon_Sample-189.FIN2 | 126 | 5   | 108 | 14 | 138 | 18 | 1.1  | 13.270 | 0.140 | 0.529 | 0.005 | 0.804 | 0.1825 | 0.0013 | 2702.7 | 7   | 2735 | 20  | 2676   | 12  |
| 14AP15                           | Zircon_Sample-180.FIN2 | 552 | 61  | 102 | 5  | 135 | 4  | 4.9  | 14.730 | 0.340 | 0.531 | 0.013 | 0.906 | 0.2013 | 0.0021 | 2797   | 22  | 2745 | 56  | 2836   | 17  |
| 14AP15                           | Zircon_Sample-091.FIN2 | 163 | 3   | 76  | 6  | 97  | 9  | 2.4  | 13.690 | 0.250 | 0.532 | 0.007 | 0.955 | 0.1851 | 0.0013 | 2728   | 17  | 2750 | 31  | 2699   | 12  |
| 14AP15                           | Zircon_Sample-139.FIN2 | 77  | 12  | 35  | 13 | 51  | 14 | 3.5  | 13.610 | 0.330 | 0.538 | 0.014 | 0.843 | 0.1827 | 0.0023 | 2722   | 22  | 2774 | 58  | 2677   | 21  |
| 14AP15                           | Zircon_Sample-072.FIN2 | 272 | 27  | 416 | 59 | 524 | 64 | 0.8  | 15.360 | 0.170 | 0.546 | 0.005 | 0.799 | 0.2040 | 0.0012 | 2838   | 10  | 2806 | 21  | 2858   | 10  |
| 14AP15                           | Zircon_Sample-176.FIN2 | 511 | 75  | 57  | 5  | 79  | 6  | 7.9  | 16.670 | 0.390 | 0.585 | 0.011 | 0.954 | 0.2079 | 0.0014 | 2915   | 22  | 2968 | 44  | 2889   | 11  |
| Common-Pb corrected <sup>d</sup> |                        |     |     |     |    |     |    |      |        |       |       |       |       |        |        |        |     |      |     |        |     |
| 14AP15                           | Zircon_sample-035.FIN2 | 447 | 50  | 224 | 16 | 48  | 4  | 2.1  | 0.643  | 0.051 | 0.079 | 0.001 | 0.645 | 0.0580 | 0.0038 | 503    | 32  | 492  | 7.4 | 620    | 66  |
| 14AP15                           | Zircon_Sample-077.FIN2 | 713 | 44  | 563 | 45 | 406 | 26 | 1.5  | 4.630  | 0.120 | 0.300 | 0.006 | 0.811 | 0.1111 | 0.0018 | 1754   | 22  | 1693 | 29  | 1816   | 29  |
| 14AP15                           | Zircon_Sample-154.FIN2 | 375 | 75  | 91  | 19 | 118 | 21 | 3.9  | 5.710  | 0.140 | 0.341 | 0.008 | 0.781 | 0.1203 | 0.0017 | 1938   | 19  | 1904 | 29  | 1959   | 26  |

<sup>a</sup>U, Th and Pb concentrations with errors (2SE) and U/Th ratios are calculated relative to the Harvard 91500 reference zircon

<sup>b</sup>Corrected for background, downhole and within-run Pb/U fractionation. Normalised to the reference zircon Harvard 91500 (TIMS/measured values). The <sup>207</sup>Pb/<sup>235</sup>U is calculated through: (<sup>207</sup>Pb/<sup>206</sup>Pb)/(<sup>238</sup>U/<sup>206</sup>Pb \* 1/137.88)

<sup>c</sup>Rho is the error correlation defined as the quotient of the propagated errors of the <sup>206</sup>Pb/<sup>238</sup>U and <sup>207</sup>Pb/<sup>235</sup>U ratios

<sup>d</sup>Quadratic addition of within-run errors (2 SE) and the all-session reproducibility of Harvard-91500, GJ-1 and Plesovice zircon reference materials (2 SE)

<sup>e</sup>Normalised to the Harvard 91500 reference zircon

<sup>f</sup>Common Pb correction through measured Pb<sup>204</sup> (corrected for Hg<sup>204</sup> using natural abundance Hg isotopic ratios) and the model Pb composition of Stacey & Kramers (1975))

### Attachment 3 Results of U-Pb dating of detrital zircons

| Sample# | coordinates  |               |
|---------|--------------|---------------|
| 14AP15  | N 75 56 47.4 | E 138 37 22.2 |
| 14AP18  | N 75 56 47.4 | E 138 37 22.2 |
| 14AP21  | N 75 56 47.4 | E 138 37 18.1 |
| 14AP24  | N 75 56 47.2 | E 138 37 13.5 |
| 14AP43  | N 75 54 10.9 | E 137 26 23.4 |
| 14AP56  | N 75 33 52.6 | E 137 07 37.0 |
| 14AP59  | N 75 33 58.9 | E 137 07 10.7 |
| 14AP65  | N 75 36 05.4 | E 137 14 52.5 |
| 14AP66  | N 75 36 05.4 | E 137 14 52.5 |

14AP18

|        |                        | CONCENTRATIONS <sup>a</sup> |            |          |            |          |            | RATIOS            |                                                  |                         |                                                  |                         |                  | AGES                                              |                         |                                                  |                         |                                                  |                         |                                                   |                         |
|--------|------------------------|-----------------------------|------------|----------|------------|----------|------------|-------------------|--------------------------------------------------|-------------------------|--------------------------------------------------|-------------------------|------------------|---------------------------------------------------|-------------------------|--------------------------------------------------|-------------------------|--------------------------------------------------|-------------------------|---------------------------------------------------|-------------------------|
| Sample | Analysis               | U [ppm]                     | 2 $\sigma$ | Th [ppm] | 2 $\sigma$ | Pb [ppm] | 2 $\sigma$ | U/Th <sup>a</sup> | <sup>207</sup> Pb/ <sup>235</sup> U <sup>b</sup> | 2 $\sigma$ <sup>d</sup> | <sup>206</sup> Pb/ <sup>238</sup> U <sup>b</sup> | 2 $\sigma$ <sup>d</sup> | rho <sup>c</sup> | <sup>207</sup> Pb/ <sup>206</sup> Pb <sup>e</sup> | 2 $\sigma$ <sup>d</sup> | <sup>207</sup> Pb/ <sup>235</sup> U <sup>b</sup> | 2 $\sigma$ <sup>d</sup> | <sup>206</sup> Pb/ <sup>238</sup> U <sup>b</sup> | 2 $\sigma$ <sup>d</sup> | <sup>207</sup> Pb/ <sup>206</sup> Pb <sup>e</sup> | 2 $\sigma$ <sup>d</sup> |
| 14AP18 | Zircon_Sample-140.FIN2 | 366                         | 46         | 92       | 4          | 5        | 0          | 3.9               | 0.128                                            | 0.006                   | 0.019                                            | 0.000                   | 0.506            | 0.0492                                            | 0.0024                  | 121.8                                            | 5.8                     | 119.7                                            | 1.9                     | 150                                               | 110                     |
| 14AP18 | Zircon_Sample-075.FIN2 | 529                         | 32         | 368      | 31         | 24       | 2          | 1.5               | 0.163                                            | 0.004                   | 0.023                                            | 0.000                   | 0.191            | 0.0508                                            | 0.0011                  | 153.6                                            | 3.4                     | 148.1                                            | 1.6                     | 231                                               | 51                      |
| 14AP18 | Zircon_Sample-059.FIN2 | 170                         | 34         | 119      | 38         | 8        | 2          | 1.6               | 0.170                                            | 0.012                   | 0.025                                            | 0.000                   | 0.238            | 0.0500                                            | 0.0034                  | 159                                              | 10                      | 156.9                                            | 2.9                     | 190                                               | 140                     |
| 14AP18 | Zircon_sample-037.FIN2 | 451                         | 6          | 434      | 7          | 46       | 1          | 1.1               | 0.269                                            | 0.006                   | 0.037                                            | 0.000                   | 0.318            | 0.0529                                            | 0.0015                  | 242                                              | 4.5                     | 235.9                                            | 2.2                     | 321                                               | 65                      |
| 14AP18 | Zircon_sample-022.FIN2 | 847                         | 69         | 357      | 37         | 37       | 2          | 2.5               | 0.285                                            | 0.009                   | 0.039                                            | 0.001                   | 0.067            | 0.0530                                            | 0.0018                  | 254.2                                            | 6.9                     | 247.4                                            | 4.4                     | 327                                               | 76                      |
| 14AP18 | Zircon_Sample-053.FIN2 | 333                         | 17         | 578      | 20         | 66       | 2          | 0.6               | 0.293                                            | 0.008                   | 0.041                                            | 0.000                   | 0.045            | 0.0517                                            | 0.0013                  | 261                                              | 6                       | 258.7                                            | 1.8                     | 281                                               | 52                      |
| 14AP18 | Zircon_Sample-072.FIN2 | 219                         | 22         | 242      | 25         | 31       | 3          | 0.9               | 0.320                                            | 0.027                   | 0.041                                            | 0.001                   | 0.426            | 0.0565                                            | 0.0038                  | 281                                              | 20                      | 260.3                                            | 4                       | 460                                               | 140                     |
| 14AP18 | Zircon_Sample-118.FIN2 | 93                          | 8          | 75       | 5          | 8        | 0          | 1.3               | 0.298                                            | 0.012                   | 0.042                                            | 0.001                   | 0.276            | 0.0520                                            | 0.0017                  | 264.4                                            | 9.6                     | 265.3                                            | 4.2                     | 279                                               | 74                      |
| 14AP18 | Zircon_sample-036.FIN2 | 347                         | 24         | 578      | 47         | 70       | 5          | 0.6               | 0.321                                            | 0.008                   | 0.045                                            | 0.000                   | 0.250            | 0.0521                                            | 0.0013                  | 282.6                                            | 5.8                     | 283.56                                           | 0.91                    | 287                                               | 61                      |
| 14AP18 | Zircon_Sample-128.FIN2 | 276                         | 19         | 315      | 45         | 39       | 6          | 0.9               | 0.330                                            | 0.011                   | 0.045                                            | 0.001                   | 0.220            | 0.0527                                            | 0.0013                  | 289.3                                            | 8.7                     | 284.4                                            | 3.8                     | 312                                               | 56                      |
| 14AP18 | Zircon_Sample-076.FIN2 | 356                         | 25         | 373      | 15         | 47       | 2          | 0.9               | 0.323                                            | 0.011                   | 0.045                                            | 0.001                   | 0.334            | 0.0515                                            | 0.0016                  | 284.3                                            | 8.2                     | 286.1                                            | 3.3                     | 256                                               | 70                      |
| 14AP18 | Zircon_Sample-195.FIN2 | 333                         | 29         | 202      | 18         | 26       | 2          | 1.6               | 0.332                                            | 0.009                   | 0.046                                            | 0.000                   | 0.664            | 0.0520                                            | 0.0011                  | 290.9                                            | 6.7                     | 291                                              | 2.6                     | 285                                               | 45                      |
| 14AP18 | Zircon_Sample-088.FIN2 | 138                         | 16         | 232      | 39         | 31       | 4          | 0.6               | 0.323                                            | 0.024                   | 0.047                                            | 0.001                   | 0.010            | 0.0502                                            | 0.0039                  | 284                                              | 18                      | 295.5                                            | 4                       | 200                                               | 170                     |
| 14AP18 | Zircon_sample-020.FIN2 | 157                         | 7          | 135      | 8          | 17       | 1          | 1.2               | 0.353                                            | 0.011                   | 0.047                                            | 0.001                   | 0.654            | 0.0544                                            | 0.0017                  | 307.1                                            | 8.2                     | 295.8                                            | 3.8                     | 386                                               | 68                      |
| 14AP18 | Zircon_Sample-117.FIN2 | 243                         | 8          | 103      | 8          | 15       | 1          | 2.4               | 0.363                                            | 0.030                   | 0.049                                            | 0.001                   | 0.474            | 0.0538                                            | 0.0039                  | 314                                              | 22                      | 306.4                                            | 8.6                     | 350                                               | 160                     |
| 14AP18 | Zircon_Sample-052.FIN2 | 247                         | 19         | 158      | 14         | 22       | 2          | 1.6               | 0.356                                            | 0.011                   | 0.049                                            | 0.001                   | 0.504            | 0.0533                                            | 0.0016                  | 309                                              | 8                       | 307.1                                            | 3.6                     | 338                                               | 65                      |
| 14AP18 | Zircon_Sample-074.FIN2 | 474                         | 30         | 461      | 37         | 64       | 4          | 1.0               | 0.371                                            | 0.009                   | 0.050                                            | 0.001                   | 0.650            | 0.0531                                            | 0.0009                  | 320.2                                            | 6.4                     | 313.3                                            | 4.4                     | 329                                               | 38                      |
| 14AP18 | Zircon_Sample-141.FIN2 | 599                         | 27         | 408      | 33         | 67       | 5          | 1.5               | 0.406                                            | 0.008                   | 0.055                                            | 0.001                   | 0.220            | 0.0538                                            | 0.0016                  | 346.2                                            | 5.9                     | 344.7                                            | 4.3                     | 359                                               | 66                      |
| 14AP18 | Zircon_Sample-181.FIN2 | 131                         | 15         | 96       | 10         | 17       | 2          | 1.4               | 0.487                                            | 0.011                   | 0.063                                            | 0.001                   | 0.553            | 0.0558                                            | 0.0014                  | 402.6                                            | 7.8                     | 396.6                                            | 4                       | 442                                               | 55                      |
| 14AP18 | Zircon_sample-021.FIN2 | 342                         | 37         | 145      | 17         | 25       | 3          | 2.4               | 0.487                                            | 0.011                   | 0.065                                            | 0.001                   | 0.037            | 0.0542                                            | 0.0015                  | 402.5                                            | 7.7                     | 404.9                                            | 3                       | 375                                               | 60                      |
| 14AP18 | Zircon_Sample-061.FIN2 | 165                         | 9          | 107      | 12         | 23       | 2          | 1.6               | 0.515                                            | 0.019                   | 0.068                                            | 0.001                   | 0.414            | 0.0545                                            | 0.0018                  | 421                                              | 13                      | 423.7                                            | 4.7                     | 413                                               | 65                      |
| 14AP18 | Zircon_Sample-183.FIN2 | 130                         | 8          | 52       | 4          | 10       | 0          | 2.5               | 0.534                                            | 0.017                   | 0.071                                            | 0.001                   | 0.632            | 0.0554                                            | 0.0019                  | 434                                              | 11                      | 442                                              | 3.8                     | 448                                               | 64                      |
| 14AP18 | Zircon_Sample-102.FIN2 | 354                         | 19         | 305      | 15         | 64       | 3          | 1.2               | 0.631                                            | 0.023                   | 0.078                                            | 0.001                   | 0.042            | 0.0592                                            | 0.0023                  | 497                                              | 14                      | 484.1                                            | 5                       | 569                                               | 86                      |
| 14AP18 | Zircon_sample-012.FIN2 | 249                         | 8          | 205      | 14         | 45       | 3          | 1.2               | 0.636                                            | 0.015                   | 0.079                                            | 0.001                   | 0.232            | 0.0579                                            | 0.0011                  | 499.7                                            | 9                       | 490.5                                            | 3.6                     | 524                                               | 39                      |
| 14AP18 | Zircon_sample-014.FIN2 | 254                         | 59         | 73       | 10         | 17       | 2          | 3.4               | 0.635                                            | 0.014                   | 0.080                                            | 0.001                   | 0.160            | 0.0574                                            | 0.0012                  | 499                                              | 8.6                     | 497.5                                            | 6.6                     | 505                                               | 47                      |
| 14AP18 | Zircon_sample-013.FIN2 | 607                         | 41         | 552      | 20         | 132      | 4          | 1.1               | 0.701                                            | 0.010                   | 0.085                                            | 0.001                   | 0.063            | 0.0595                                            | 0.0010                  | 539.1                                            | 5.7                     | 523.7                                            | 3.3                     | 585                                               | 36                      |
| 14AP18 | Zircon_Sample-156.FIN2 | 159                         | 26         | 196      | 23         | 51       | 5          | 0.8               | 0.711                                            | 0.019                   | 0.089                                            | 0.001                   | 0.319            | 0.0568                                            | 0.0020                  | 545                                              | 11                      | 552                                              | 8.5                     | 477                                               | 77                      |
| 14AP18 | Zircon_Sample-202.FIN2 | 90                          | 4          | 77       | 6          | 20       | 2          | 1.2               | 0.732                                            | 0.027                   | 0.090                                            | 0.001                   | 0.202            | 0.0590                                            | 0.0023                  | 557                                              | 16                      | 553.2                                            | 6.4                     | 562                                               | 89                      |
| 14AP18 | Zircon_Sample-150.FIN2 | 150                         | 17         | 44       | 6          | 14       | 2          | 3.5               | 0.883                                            | 0.037                   | 0.105                                            | 0.001                   | 0.401            | 0.0610                                            | 0.0026                  | 642                                              | 20                      | 641.4                                            | 4                       | 632                                               | 89                      |
| 14AP18 | Zircon_sample-023.FIN2 | 225                         | 16         | 297      | 24         | 86       | 6          | 0.8               | 0.887                                            | 0.011                   | 0.105                                            | 0.001                   | 0.887            | 0.0614                                            | 0.0004                  | 644.6                                            | 6.1                     | 644.6                                            | 3.9                     | 654                                               | 15                      |
| 14AP18 | Zircon_Sample-090.FIN2 | 152                         | 12         | 96       | 11         | 35       | 2          | 1.6               | 1.182                                            | 0.021                   | 0.131                                            | 0.002                   | 0.327            | 0.0661                                            | 0.0013                  | 792.2                                            | 9.5                     | 791                                              | 10                      | 808                                               | 41                      |
| 14AP18 | Zircon_Sample-204.FIN2 | 198                         | 12         | 135      | 11         | 54       | 4          | 1.5               | 1.255                                            | 0.020                   | 0.138                                            | 0.001                   | 0.397            | 0.0660                                            | 0.0010                  | 830                                              | 12                      | 830.7                                            | 7.3                     | 818                                               | 39                      |
| 14AP18 | Zircon_Sample-086.FIN2 | 2210                        | 250        | 335      | 23         | 146      | 8          | 6.4               | 2.115                                            | 0.052                   | 0.151                                            | 0.003                   | 0.960            | 0.1016                                            | 0.0007                  | 1157                                             | 18                      | 904                                              | 19                      | 1653                                              | 12                      |
| 14AP18 | Zircon_sample-034.FIN2 | 630                         | 110        | 226      | 97         | 92       | 35         | 5.0               | 1.517                                            | 0.034                   | 0.155                                            | 0.002                   | 0.917            | 0.0709                                            | 0.0007                  | 937                                              | 14                      | 927                                              | 11                      | 954                                               | 19                      |
| 14AP18 | Zircon_Sample-137.FIN2 | 114                         | 13         | 58       | 4          | 25       | 1          | 2.0               | 1.654                                            | 0.049                   | 0.162                                            | 0.001                   | 0.490            | 0.0743                                            | 0.0018                  | 990                                              | 19                      | 967.4                                            | 7.1                     | 1045                                              | 50                      |
| 14AP18 | Zircon_Sample-099.FIN2 | 46                          | 2          | 44       | 2          | 20       | 1          | 1.0               | 1.725                                            | 0.062                   | 0.162                                            | 0.002                   | 0.622            | 0.0767                                            | 0.0022                  | 1017                                             | 23                      | 970                                              | 13                      | 1108                                              | 58                      |
| 14AP18 | Zircon_Sample-077.FIN2 | 107                         | 5          | 81       | 4          | 41       | 2          | 1.3               | 1.915                                            | 0.042                   | 0.182                                            | 0.003                   | 0.073            | 0.0765                                            | 0.0018                  | 1086                                             | 15                      | 1076                                             | 13                      | 1107                                              | 46                      |
| 14AP18 | Zircon_sample-025.FIN2 | 83                          | 6          | 37       | 2          | 19       | 1          | 2.2               | 2.067                                            | 0.030                   | 0.190                                            | 0.002                   | 0.408            | 0.0795                                            | 0.0009                  | 1138                                             | 10                      | 1120                                             | 10                      | 1185                                              | 22                      |
| 14AP18 | Zircon_Sample-167.FIN2 | 1346                        | 81         | 260      | 50         | 209      | 33         | 6.0               | 2.898                                            | 0.077                   | 0.197                                            | 0.005                   | 0.970            | 0.1057                                            | 0.0010                  | 1381                                             | 20                      | 1159                                             | 28                      | 1726                                              | 17                      |
| 14AP18 | Zircon_Sample-190.FIN2 | 109                         | 9          | 30       | 5          | 19       | 2          | 3.7               | 2.595                                            | 0.082                   | 0.222                                            | 0.005                   | 0.758            | 0.0847                                            | 0.0018                  | 1298                                             | 23                      | 1294                                             | 24                      | 1308                                              | 40                      |
| 14AP18 | Zircon_Sample-079.FIN2 | 29                          | 1          | 30       | 2          | 19       | 1          | 1.0               | 2.820                                            | 0.130                   | 0.231                                            | 0.003                   | 0.337            | 0.0883                                            | 0.0036                  | 1357                                             | 34                      | 1341                                             | 14                      | 1379                                              | 81                      |
| 14AP18 | Zircon_Sample-104.FIN2 | 39                          | 4          | 29       | 3          | 19       | 2          | 1.4               | 2.890                                            | 0.140                   | 0.241                                            | 0.004                   | 0.075            | 0.0874                                            | 0.0044                  | 1378                                             | 36                      | 1393                                             | 20                      | 1362                                              | 96                      |
| 14AP18 | Zircon_Sample-177.FIN2 | 122                         | 8          | 83       | 10         | 55       | 4          | 1.7               | 2.995                                            | 0.059                   | 0.244                                            | 0.003                   | 0.705            | 0.0901                                            | 0.0012                  | 1406                                             | 15                      | 1405                                             | 16                      | 1428                                              | 26                      |
| 14AP18 | Zircon_Sample-155.FIN2 | 802                         | 76         | 250      | 35         | 176      | 18         | 3.3               | 3.640                                            | 0.440                   | 0.251                                            | 0.028                   | 0.994            | 0.1053                                            | 0.0013                  | 1550                                             | 100                     | 1440                                             | 150                     | 1720                                              | 23                      |
| 14AP18 | Zircon_sample-010.FIN2 | 89                          | 3          | 66       | 4          | 45       | 2          | 1.3               | 3.389                                            | 0.063                   | 0.256                                            | 0.005                   | 0.689            | 0.0976                                            | 0.0018                  | 1502                                             | 15                      | 1467                                             | 25                      | 1579                                              | 34                      |
| 14AP18 | Zircon_Sample-124.FIN2 | 1148                        | 44         | 1129     | 72         | 715      | 53         | 1.0               | 4.690                                            | 0.170                   | 0.259                                            | 0.009                   | 0.940            | 0.1321                                            | 0.0015                  | 1763                                             | 30                      | 1484                                             | 49                      | 2125                                              | 20                      |
| 14AP18 | Zircon_Sample-130.FIN2 | 551                         | 70         | 233      | 14         | 183      | 7          | 2.3               | 4.110                                            | 0.180                   | 0.272                                            | 0.008                   | 0.969            | 0.1108                                            | 0.0015                  | 1653                                             | 36                      | 1551                                             | 42                      | 1817                                              | 22                      |
| 14AP18 | Zircon_Sample-105.FIN2 | 153                         | 8          | 126      | 7          | 90       | 4          | 1.2               | 3.813                                            | 0.069                   | 0.280                                            | 0.004                   | 0.675            | 0.0990                                            | 0.0014                  | 1595                                             | 15                      | 1593                                             | 20                      | 1605                                              | 27                      |
| 14AP18 | Zircon_Sample-103.FIN2 | 290                         | 35         | 75       | 11         | 58       | 5          | 3.7               | 3.837                                            | 0.061                   | 0.282                                            | 0.004                   | 0.885            | 0.0990                                            | 0.0008                  | 1600                                             | 13                      | 1600                                             | 18                      | 1605                                              | 16                      |
| 14AP18 | Zircon_sample-038.FIN2 | 708                         | 33         | 484      | 12         | 345      | 8          | 1.5               | 4.425                                            | 0.053                   | 0.285                                            | 0.003                   | 0.798            | 0.1124                                            | 0.0009                  | 1716.7                                           | 9.9                     | 1618                                             | 16                      | 1838                                              | 14                      |
| 14AP18 | Zircon_sample-039.FIN2 | 269                         | 42         | 105      | 20         | 74       | 14         | 2.4               | 3.976                                            | 0.081                   | 0.289                                            | 0.007                   | 0.892            | 0.1008                                            | 0.0011                  | 1629                                             | 17                      | 1638                                             | 36                      | 1638                                              | 19                      |
| 14AP18 | Zircon_Sample-153.FIN2 | 167                         | 27         | 92       | 12         | 71       | 6          | 1.8               | 4.090                                            | 0.110                   | 0.293                                            | 0.008                   | 0.886            | 0.1006                                            | 0.0011                  | 1651                                             | 23                      | 1656                                             | 41                      | 1635                                              | 21                      |
| 14AP18 | Zircon_Sample-157.FIN2 | 75                          | 6          | 73       | 7          | 57       | 5          | 1.0               | 4.139                                            | 0.091                   | 0.294                                            | 0.004                   | 0.734            | 0.1017                                            | 0.0016                  | 1662                                             | 18                      | 1660                                             | 19                      | 1654                                              | 29                      |
| 14AP18 | Zircon_Sample-151.FIN2 | 470                         | 44         | 215      | 16         | 170      | 10         | 2.2               | 4.384                                            | 0.062                   | 0.301                                            | 0.004                   | 0.873            | 0.1059                                            | 0.0009                  | 1709                                             | 12                      | 1697                                             | 21                      | 1729                                              | 15                      |
| 14AP18 | Zircon_Sample-180.FIN2 | 64                          | 4          | 56       | 6          | 46       | 3          | 1.1               | 4.350                                            | 0.110                   | 0.304                                            | 0.004                   | 0.674            | 0.1040                                            | 0.0020                  | 1703                                             | 20                      | 1709                                             | 19                      | 1696                                              | 36                      |
| 14AP18 | Zircon_sample-040.FIN2 | 610                         | 32         | 37       | 3          | 29       | 1          | 16.5              | 5.260                                            | 0.130                   | 0.314                                            | 0.007                   | 0.966            | 0.1216                                            | 0.0009                  | 1862                                             | 20                      | 1760                                             | 33                      | 1979                                              | 14                      |
| 14AP18 | Zircon_Sample-060.FIN2 | 769                         | 29         | 154      | 5          | 132      | 6          | 4.9               | 5.034                                            | 0.091                   | 0.315                                            | 0.005                   | 0.926            | 0.1160                                            | 0.0008                  | 1825                                             | 15                      | 1764                                             | 25                      | 1895                                              | 13                      |
| 14AP18 | Zircon_Sample-113.FIN2 | 114                         | 5          | 87       | 4          | 69       | 2          | 1.3               | 4.950                                            | 0.100                   | 0.316                                            | 0.006                   | 0.843            | 0.1135                                            | 0.0011                  | 1811                                             | 17                      | 1769                                             | 29                      | 1856                                              | 17                      |
| 14AP18 | Zircon_Sample-196.FIN2 | 234                         | 22         | 112      | 12         | 89       | 6          | 2.1               | 4.934                                            | 0.071                   | 0.316                                            | 0.                      |                  |                                                   |                         |                                                  |                         |                                                  |                         |                                                   |                         |

|                                  |                        |      |     |     |     |     |    |      |        |       |       |       |       |        |        |        |     |       |     |        |     |
|----------------------------------|------------------------|------|-----|-----|-----|-----|----|------|--------|-------|-------|-------|-------|--------|--------|--------|-----|-------|-----|--------|-----|
| 14AP18                           | Zircon_Sample-206.FIN2 | 390  | 14  | 141 | 5   | 136 | 6  | 2.8  | 6.483  | 0.063 | 0.374 | 0.003 | 0.791 | 0.1262 | 0.0006 | 2043.5 | 8.5 | 2047  | 16  | 2044.9 | 8.1 |
| 14AP18                           | Zircon_Sample-115.FIN2 | 101  | 29  | 104 | 15  | 94  | 12 | 1.1  | 6.280  | 0.200 | 0.379 | 0.012 | 0.956 | 0.1189 | 0.0010 | 2014   | 29  | 2069  | 58  | 1940   | 15  |
| 14AP18                           | Zircon_Sample-091.FIN2 | 167  | 20  | 46  | 6   | 52  | 5  | 3.4  | 9.270  | 0.110 | 0.413 | 0.004 | 0.896 | 0.1622 | 0.0010 | 2365   | 11  | 2230  | 18  | 2478   | 10  |
| 14AP18                           | Zircon_sample-009.FIN2 | 65   | 5   | 49  | 1   | 52  | 2  | 1.3  | 9.210  | 0.190 | 0.427 | 0.008 | 0.814 | 0.1559 | 0.0020 | 2362   | 18  | 2291  | 34  | 2411   | 22  |
| 14AP18                           | Zircon_Sample-154.FIN2 | 347  | 45  | 387 | 38  | 425 | 36 | 0.9  | 10.660 | 0.410 | 0.455 | 0.015 | 0.964 | 0.1707 | 0.0017 | 2491   | 36  | 2417  | 69  | 2564   | 16  |
| 14AP18                           | Zircon_Sample-092.FIN2 | 565  | 25  | 220 | 19  | 259 | 24 | 2.6  | 10.860 | 0.280 | 0.461 | 0.012 | 0.955 | 0.1700 | 0.0013 | 2510   | 24  | 2442  | 53  | 2558   | 13  |
| 14AP18                           | Zircon_Sample-182.FIN2 | 216  | 16  | 138 | 15  | 158 | 12 | 1.6  | 10.940 | 0.200 | 0.462 | 0.006 | 0.887 | 0.1709 | 0.0015 | 2517   | 17  | 2449  | 28  | 2566   | 14  |
| 14AP18                           | Zircon_Sample-189.FIN2 | 740  | 140 | 231 | 36  | 271 | 38 | 3.2  | 11.140 | 0.400 | 0.463 | 0.015 | 0.970 | 0.1741 | 0.0012 | 2533   | 34  | 2452  | 68  | 2597   | 11  |
| 14AP18                           | Zircon_Sample-066.FIN2 | 252  | 22  | 134 | 8   | 162 | 13 | 1.8  | 10.850 | 0.250 | 0.469 | 0.010 | 0.962 | 0.1679 | 0.0016 | 2510   | 21  | 2480  | 42  | 2542   | 13  |
| 14AP18                           | Zircon_Sample-208.FIN2 | 153  | 15  | 80  | 8   | 88  | 5  | 1.9  | 10.730 | 0.160 | 0.471 | 0.006 | 0.846 | 0.1655 | 0.0016 | 2500   | 14  | 2489  | 26  | 2517   | 15  |
| 14AP18                           | Zircon_Sample-063.FIN2 | 509  | 52  | 65  | 13  | 80  | 16 | 8.0  | 11.960 | 0.410 | 0.479 | 0.015 | 0.970 | 0.1798 | 0.0016 | 2600   | 33  | 2522  | 67  | 2651   | 14  |
| 14AP18                           | Zircon_sample-024.FIN2 | 214  | 23  | 116 | 13  | 130 | 10 | 1.9  | 11.290 | 0.250 | 0.479 | 0.008 | 0.941 | 0.1717 | 0.0012 | 2547   | 21  | 2524  | 34  | 2574   | 12  |
| 14AP18                           | Zircon_Sample-203.FIN2 | 309  | 24  | 31  | 11  | 41  | 12 | 13.4 | 11.640 | 0.180 | 0.488 | 0.007 | 0.905 | 0.1727 | 0.0012 | 2576   | 14  | 2562  | 31  | 2584   | 12  |
| 14AP18                           | Zircon_Sample-138.FIN2 | 283  | 52  | 440 | 100 | 483 | 99 | 0.7  | 11.770 | 0.210 | 0.490 | 0.006 | 0.861 | 0.1748 | 0.0017 | 2586   | 17  | 2570  | 27  | 2604   | 16  |
| 14AP18                           | Zircon_Sample-166.FIN2 | 19   | 2   | 15  | 2   | 20  | 2  | 1.2  | 12.330 | 0.320 | 0.496 | 0.010 | 0.877 | 0.1809 | 0.0025 | 2629   | 24  | 2597  | 41  | 2660   | 23  |
| 14AP18                           | Zircon_Sample-114.FIN2 | 121  | 6   | 128 | 10  | 156 | 12 | 1.0  | 12.840 | 0.180 | 0.500 | 0.007 | 0.873 | 0.1856 | 0.0013 | 2668   | 14  | 2613  | 31  | 2703   | 11  |
| 14AP18                           | Zircon_Sample-049.FIN2 | 473  | 61  | 209 | 22  | 249 | 17 | 2.2  | 12.530 | 0.200 | 0.501 | 0.010 | 0.876 | 0.1807 | 0.0017 | 2644   | 15  | 2619  | 41  | 2659   | 15  |
| 14AP18                           | Zircon_Sample-136.FIN2 | 348  | 24  | 244 | 16  | 303 | 11 | 1.4  | 12.550 | 0.230 | 0.503 | 0.009 | 0.914 | 0.1813 | 0.0011 | 2646   | 17  | 2626  | 37  | 2665   | 9.7 |
| 14AP18                           | Zircon_Sample-193.FIN2 | 56   | 6   | 76  | 8   | 93  | 6  | 0.7  | 12.590 | 0.270 | 0.503 | 0.006 | 0.801 | 0.1826 | 0.0021 | 2648   | 20  | 2626  | 27  | 2676   | 19  |
| 14AP18                           | Zircon_Sample-125.FIN2 | 123  | 18  | 175 | 36  | 210 | 41 | 0.7  | 12.000 | 0.160 | 0.503 | 0.008 | 0.800 | 0.1730 | 0.0015 | 2607   | 11  | 2627  | 33  | 2587   | 14  |
| 14AP18                           | Zircon_Sample-131.FIN2 | 57   | 5   | 36  | 5   | 47  | 5  | 1.6  | 12.360 | 0.330 | 0.504 | 0.009 | 0.828 | 0.1767 | 0.0014 | 2631   | 25  | 2629  | 40  | 2622   | 13  |
| 14AP18                           | Zircon_Sample-050.FIN2 | 77   | 11  | 79  | 13  | 98  | 14 | 1.0  | 12.920 | 0.150 | 0.505 | 0.004 | 0.838 | 0.1848 | 0.0020 | 2674   | 11  | 2637  | 15  | 2696   | 18  |
| 14AP18                           | Zircon_Sample-143.FIN2 | 116  | 12  | 91  | 9   | 114 | 10 | 1.3  | 12.720 | 0.200 | 0.514 | 0.007 | 0.633 | 0.1789 | 0.0023 | 2663   | 13  | 2673  | 28  | 2642   | 22  |
| 14AP18                           | Zircon_Sample-207.FIN2 | 85   | 5   | 52  | 3   | 65  | 2  | 1.7  | 13.190 | 0.160 | 0.514 | 0.004 | 0.853 | 0.1842 | 0.0016 | 2693   | 12  | 2674  | 16  | 2695   | 12  |
| 14AP18                           | Zircon_Sample-168.FIN2 | 117  | 16  | 85  | 7   | 108 | 9  | 1.4  | 12.510 | 0.250 | 0.518 | 0.009 | 0.724 | 0.1756 | 0.0021 | 2643   | 19  | 2688  | 36  | 2611   | 20  |
| 14AP18                           | Zircon_Sample-111.FIN2 | 186  | 16  | 178 | 5   | 229 | 6  | 1.1  | 13.350 | 0.400 | 0.518 | 0.009 | 0.932 | 0.1875 | 0.0023 | 2703   | 28  | 2690  | 40  | 2720   | 20  |
| 14AP18                           | Zircon_Sample-192.FIN2 | 311  | 32  | 286 | 23  | 366 | 23 | 1.1  | 13.310 | 0.180 | 0.524 | 0.007 | 0.876 | 0.1851 | 0.0009 | 2701   | 13  | 2717  | 30  | 2699.4 | 7.8 |
| 14AP18                           | Zircon_sample-011.FIN2 | 114  | 7   | 217 | 18  | 273 | 19 | 0.5  | 13.580 | 0.130 | 0.527 | 0.006 | 0.765 | 0.1862 | 0.0012 | 2720.9 | 9.2 | 2728  | 24  | 2708   | 10  |
| 14AP18                           | Zircon_Sample-085.FIN2 | 151  | 21  | 117 | 28  | 155 | 39 | 1.5  | 15.010 | 0.250 | 0.532 | 0.008 | 0.843 | 0.2027 | 0.0019 | 2816   | 16  | 2751  | 31  | 2848   | 15  |
| 14AP18                           | Zircon_Sample-178.FIN2 | 121  | 9   | 80  | 8   | 104 | 6  | 1.5  | 14.150 | 0.270 | 0.539 | 0.008 | 0.873 | 0.1922 | 0.0015 | 2759   | 19  | 2779  | 35  | 2761   | 13  |
| 14AP18                           | Zircon_Sample-129.FIN2 | 108  | 10  | 112 | 8   | 141 | 10 | 1.0  | 14.840 | 0.180 | 0.544 | 0.005 | 0.788 | 0.1971 | 0.0016 | 2805   | 12  | 2802  | 21  | 2802   | 13  |
| 14AP18                           | Zircon_Sample-078.FIN2 | 354  | 40  | 105 | 29  | 157 | 37 | 3.8  | 15.590 | 0.280 | 0.557 | 0.011 | 0.847 | 0.2023 | 0.0019 | 2851   | 17  | 2854  | 46  | 2845   | 15  |
| 14AP18                           | Zircon_Sample-048.FIN2 | 324  | 40  | 250 | 32  | 341 | 42 | 1.3  | 16.550 | 0.440 | 0.565 | 0.012 | 0.986 | 0.2125 | 0.0017 | 2908   | 26  | 2887  | 51  | 2924   | 13  |
| 14AP18                           | Zircon_Sample-116.FIN2 | 222  | 54  | 74  | 11  | 95  | 11 | 2.9  | 16.680 | 0.630 | 0.583 | 0.021 | 0.974 | 0.2070 | 0.0016 | 2913   | 36  | 2958  | 85  | 2882   | 12  |
| 14AP18                           | Zircon_Sample-205.FIN2 | 129  | 37  | 34  | 4   | 47  | 5  | 3.5  | 19.400 | 1.400 | 0.658 | 0.032 | 0.974 | 0.2148 | 0.0041 | 3070   | 67  | 3260  | 130 | 2941   | 30  |
| 14AP18                           | Zircon_Sample-194.FIN2 | 78   | 8   | 47  | 6   | 77  | 7  | 1.6  | 25.200 | 0.410 | 0.676 | 0.009 | 0.855 | 0.2692 | 0.0021 | 3315   | 16  | 3329  | 34  | 3301   | 12  |
| Common-Pb corrected <sup>d</sup> |                        |      |     |     |     |     |    |      |        |       |       |       |       |        |        |        |     |       |     |        |     |
| 14AP18                           | Zircon_sample-007.FIN2 | 428  | 59  | 252 | 46  | 155 | 24 | 2.0  | 5.750  | 0.420 | 0.323 | 0.024 | 0.996 | 0.1295 | 0.0011 | 1931   | 72  | 1800  | 120 | 2090   | 15  |
| 14AP18                           | Zircon_Sample-065.FIN2 | 867  | 77  | 205 | 10  | 110 | 5  | 4.3  | 1.862  | 0.055 | 0.175 | 0.005 | 0.894 | 0.0773 | 0.0009 | 1067   | 20  | 1041  | 30  | 1129   | 23  |
| 14AP18                           | Zircon_Sample-100.FIN2 | 429  | 20  | 315 | 22  | 243 | 28 | 1.4  | 4.810  | 0.300 | 0.306 | 0.019 | 0.993 | 0.1143 | 0.0011 | 1783   | 54  | 1719  | 93  | 1869   | 17  |
| 14AP18                           | Zircon_Sample-152.FIN2 | 649  | 23  | 201 | 21  | 153 | 8  | 3.4  | 4.390  | 0.230 | 0.265 | 0.014 | 0.967 | 0.1202 | 0.0010 | 1707   | 43  | 1512  | 72  | 1960   | 15  |
| 14AP18                           | Zircon_Sample-165.FIN2 | 1430 | 140 | 156 | 37  | 46  | 6  | 11.7 | 0.302  | 0.015 | 0.043 | 0.001 | 0.660 | 0.0492 | 0.0024 | 268    | 11  | 273.8 | 5.4 | 217    | 74  |

<sup>a</sup>U, Th and Pb concentrations with errors (2SE) and U/Th ratios are calculated relative to the Harvard 91500 reference zircon

<sup>b</sup>Corrected for background, downhole and within-run Pb/U fractionation. Normalised to the reference zircon Harvard 91500 (TIMS/measured values). The <sup>207</sup>Pb/<sup>235</sup>U is calculated through: (<sup>207</sup>Pb/<sup>206</sup>Pb)/(<sup>238</sup>U/<sup>235</sup>U \* 1/137.88)

<sup>c</sup>Rho is the error correlation defined as the quotient of the propagated errors of the <sup>206</sup>Pb/<sup>238</sup>U and <sup>207</sup>Pb/<sup>235</sup>U ratios

<sup>d</sup>Quadratic addition of within-run errors (2 SE) and the all-session reproducibility of Harvard-91500, GJ-1 and Plesovice zircon reference materials (2 SE)

<sup>e</sup>Normalised to the Harvard 91500 reference zircon

<sup>f</sup>Common Pb correction through measured Pb<sup>204</sup> (corrected for Hg<sup>204</sup> using natural abundance Hg isotopic ratios) and the model Pb composition of Stacey & Kramers (1975))

14AP21

|        |                        | CONCENTRATIONS <sup>a</sup> |     |          |     |          |     | RATIOS            |                                                  |                  |                                                  |                  |                  | AGES                                              |                  |                                                  |                  |                                                  |                  |                                                   |                  |
|--------|------------------------|-----------------------------|-----|----------|-----|----------|-----|-------------------|--------------------------------------------------|------------------|--------------------------------------------------|------------------|------------------|---------------------------------------------------|------------------|--------------------------------------------------|------------------|--------------------------------------------------|------------------|---------------------------------------------------|------------------|
| Sample | Analysis               | U [ppm]                     | 2 σ | Th [ppm] | 2 σ | Pb [ppm] | 2 σ | U/Th <sup>a</sup> | <sup>207</sup> Pb/ <sup>235</sup> U <sup>b</sup> | 2 σ <sup>d</sup> | <sup>206</sup> Pb/ <sup>238</sup> U <sup>b</sup> | 2 σ <sup>d</sup> | rho <sup>c</sup> | <sup>207</sup> Pb/ <sup>206</sup> Pb <sup>e</sup> | 2 σ <sup>d</sup> | <sup>207</sup> Pb/ <sup>235</sup> U <sup>b</sup> | 2 σ <sup>d</sup> | <sup>206</sup> Pb/ <sup>238</sup> U <sup>b</sup> | 2 σ <sup>d</sup> | <sup>207</sup> Pb/ <sup>206</sup> Pb <sup>e</sup> | 2 σ <sup>d</sup> |
| 14AP21 | Zircon_Sample-100.FIN2 | 1130                        | 250 | 810      | 170 | 31       | 6   | 1.7               | 0.096                                            | 0.003            | 0.015                                            | 0.000            | 0.536            | 0.0475                                            | 0.0014           | 92.9                                             | 3.2              | 95                                               | 1.3              | 93                                                | 69               |
| 14AP21 | Zircon_Sample-144.FIN2 | 1570                        | 130 | 1060     | 160 | 55       | 7   | 1.4               | 0.123                                            | 0.003            | 0.018                                            | 0.000            | 0.489            | 0.0499                                            | 0.0009           | 117.4                                            | 2.8              | 112.4                                            | 1.6              | 186                                               | 44               |
| 14AP21 | Zircon_Sample-152.FIN2 | 127                         | 16  | 109      | 23  | 8        | 2   | 1.3               | 0.184                                            | 0.008            | 0.027                                            | 0.000            | 0.318            | 0.0500                                            | 0.0024           | 171.7                                            | 7.1              | 172.7                                            | 2.5              | 190                                               | 100              |
| 14AP21 | Zircon_Sample-126.FIN2 | 756                         | 75  | 155      | 16  | 20       | 3   | 4.7               | 0.255                                            | 0.008            | 0.035                                            | 0.000            | 0.228            | 0.0531                                            | 0.0017           | 230.7                                            | 6.2              | 220.4                                            | 3.1              | 328                                               | 73               |
| 14AP21 | Zircon_sample-009.FIN2 | 1464                        | 61  | 796      | 38  | 93       | 3   | 1.8               | 0.337                                            | 0.011            | 0.041                                            | 0.001            | 0.574            | 0.0595                                            | 0.0014           | 294.5                                            | 8.2              | 256.4                                            | 3.9              | 585                                               | 52               |
| 14AP21 | Zircon_sample-033.FIN2 | 880                         | 63  | 823      | 57  | 99       | 7   | 1.1               | 0.309                                            | 0.007            | 0.041                                            | 0.000            | 0.677            | 0.0536                                            | 0.0008           | 273.1                                            | 5.3              | 259.2                                            | 2.1              | 352                                               | 33               |
| 14AP21 | Zircon_sample-024.FIN2 | 1255                        | 81  | 1056     | 70  | 112      | 5   | 1.2               | 0.330                                            | 0.007            | 0.041                                            | 0.001            | 0.312            | 0.0587                                            | 0.0013           | 289.1                                            | 5.5              | 260.8                                            | 4.4              | 553                                               | 49               |
| 14AP21 | Zircon_sample-011.FIN2 | 341                         | 14  | 612      | 17  | 72       | 2   | 0.5               | 0.298                                            | 0.010            | 0.042                                            | 0.000            | 0.193            | 0.0513                                            | 0.0017           | 264.8                                            | 7.5              | 264.7                                            | 2.3              | 248                                               | 74               |
| 14AP21 | Zircon_sample-025.FIN2 | 861                         | 17  | 626      | 22  | 85       | 2   | 1.4               | 0.348                                            | 0.014            | 0.044                                            | 0.000            | 0.022            | 0.0568                                            | 0.0024           | 303                                              | 11               | 279.1                                            | 1.7              | 479                                               | 92               |
| 14AP21 | Zircon_Sample-143.FIN2 | 1730                        | 270 | 43       | 11  | 7        | 1   | 48.0              | 0.337                                            | 0.010            | 0.044                                            | 0.001            | 0.666            | 0.0549                                            | 0.0012           | 294.7                                            | 7.3              | 279.2                                            | 3.9              | 406                                               | 49               |
| 14AP21 | Zircon_Sample-089.FIN2 | 539                         | 20  | 354      | 16  | 47       | 2   | 1.4               | 0.314                                            | 0.006            | 0.045                                            | 0.000            | 0.545            | 0.0525                                            | 0.0009           | 277.3                                            | 4.5              | 281.2                                            | 2.7              | 304                                               | 37               |
| 14AP21 | Zircon_Sample-150.FIN2 | 397                         | 25  | 750      | 110 | 91       | 13  | 0.6               | 0.340                                            | 0.008            | 0.045                                            | 0.001            | 0.211            | 0.0550                                            | 0.0016           | 296.7                                            | 6.1              | 281.9                                            | 6                | 410                                               | 66               |
| 14AP21 | Zircon_Sample-163.FIN2 | 166                         | 13  | 404      | 35  | 49       | 4   | 0.4               | 0.363                                            | 0.015            | 0.046                                            | 0.001            | 0.305            | 0.0575                                            | 0.0022           | 314                                              | 11               | 290.6                                            | 4.3              | 522                                               | 89               |
| 14AP21 | Zircon_Sample-127.FIN2 | 1120                        | 110 | 401      | 60  | 54       | 6   | 3.0               | 0.378                                            | 0.013            | 0.046                                            | 0.001            | 0.250            | 0.0592                                            | 0.0023           | 325.3                                            | 9.6              | 291.9                                            | 7.6              | 568                                               | 83               |
| 14AP21 | Zircon_sample-010.FIN2 | 233                         | 16  | 177      | 19  | 23       | 2   | 1.3               | 0.348                                            | 0.013            | 0.048                                            | 0.001            | 0.329            | 0.0524                                            | 0.0024           | 303                                              | 9.8              | 301.8                                            | 4.7              | 300                                               | 100              |
| 14AP21 | Zircon_Sample-205.FIN2 | 342                         | 23  | 156      | 9   | 21       | 1   | 2.2               | 0.346                                            | 0.010            | 0.048                                            | 0.000            | 0.426            | 0.0514                                            | 0.0013           | 301.4                                            | 7.3              | 302.8                                            | 2.9              | 287                                               | 57               |
| 14AP21 | Zircon_Sample-101.FIN2 | 1210                        | 200 | 580      | 100 | 75       | 10  | 2.6               | 0.351                                            | 0.008            | 0.050                                            | 0.001            | 0.722            | 0.0519                                            | 0.0008           | 305                                              | 5.8              | 311.9                                            | 5.8              | 289                                               | 36               |
| 14AP21 | Zircon_Sample-118.FIN2 | 427                         | 37  | 434      | 17  | 63       | 2   | 0.9               | 0.365                                            | 0.006            | 0.050                                            | 0.001            | 0.522            | 0.0531                                            | 0.0007           | 316                                              | 4.4              | 313.4                                            | 4.5              | 341                                               | 33               |
| 14AP21 | Zircon_sample-012.FIN2 | 826                         | 44  | 49       | 3   | 7        | 0   | 16.7              | 0.368                                            | 0.009            | 0.051                                            | 0.001            | 0.378            | 0.0516                                            | 0.0010           | 318.2                                            | 6.6              | 322.3                                            | 3.1              | 278                                               | 50               |
| 14AP21 | Zircon_Sample-208.FIN2 | 500                         | 21  | 325      | 22  | 50       | 3   | 1.5               | 0.420                                            | 0.010            | 0.054                                            | 0.001            | 0.706            | 0.0550                                            | 0.0012           | 355.8                                            | 6.9              | 340.7                                            | 4.2              | 411                                               | 50               |
| 14AP21 | Zircon_Sample-091.FIN2 | 1410                        | 130 | 645      | 50  | 112      | 9   | 2.1               | 0.452                                            | 0.017            | 0.056                                            | 0.001            | 0.176            | 0.0604                                            | 0.0023           | 378                                              | 12               | 350.3                                            | 5.9              | 611                                               | 82               |
| 14AP21 | Zircon_Sample-129.FIN2 | 447                         | 8   | 259      | 9   | 47       | 1   | 1.7               | 0.496                                            | 0.014            | 0.064                                            | 0.000            | 0.562            | 0.0558                                            | 0.0013           | 408.8                                            | 9.4              | 399.9                                            | 2.2              | 442                                               | 52               |
| 14AP21 | Zircon_Sample-014.FIN2 | 506                         | 35  | 302      | 36  | 60       | 7   | 1.6               | 0.503                                            | 0.007            | 0.065                                            | 0.000            | 0.744            | 0.0558                                            | 0.0007           | 413.9                                            | 4.6              | 407.7                                            | 2.7              | 443                                               | 26               |
| 14AP21 | Zircon_sample-022.FIN2 | 263                         | 20  | 102      | 8   | 19       | 1   | 2.7               | 0.527                                            | 0.021            | 0.065                                            | 0.001            | 0.012            | 0.0585                                            | 0.0026           | 430                                              | 14               | 408.5                                            | 3.9              | 542                                               | 96               |
| 14AP21 | Zircon_Sample-092.FIN2 | 523                         | 46  | 311      | 18  | 66       | 3   | 1.5               | 0.522                                            | 0.007            | 0.068                                            | 0.001            | 0.514            | 0.0576                                            | 0.0008           | 426.4                                            | 4.6              | 421.4                                            | 4.6              | 512                                               | 32               |
| 14AP21 | Zircon_Sample-182.FIN2 | 187                         | 23  | 103      | 15  | 20       | 2   | 1.8               | 0.549                                            | 0.029            | 0.067                                            | 0.001            | 0.825            | 0.0571                                            | 0.0017           | 444                                              | 19               | 423                                              | 4.8              | 492                                               | 67               |
| 14AP21 | Zircon_Sample-063.FIN2 | 807                         | 50  | 344      | 42  | 67       | 8   | 2.5               | 0.534                                            | 0.008            | 0.069                                            | 0.001            | 0.570            | 0.0565                                            | 0.0005           | 434.6                                            | 5.3              | 428.3                                            | 3.8              | 469                                               | 21               |
| 14AP21 | Zircon_Sample-112.FIN2 | 344                         | 22  | 278      | 18  | 57       | 6   | 1.2               | 0.546                                            | 0.013            | 0.070                                            | 0.001            | 0.866            | 0.0562                                            | 0.0012           | 442.5                                            | 8.8              | 438.3                                            | 5.4              | 459                                               | 47               |
| 14AP21 | Zircon_Sample-196.FIN2 | 131                         | 8   | 67       | 5   | 14       | 1   | 2.0               | 0.579                                            | 0.011            | 0.073                                            | 0.001            | 0.381            | 0.0570                                            | 0.0012           | 464                                              | 7.2              | 453.7                                            | 5.5              | 487                                               | 46               |
| 14AP21 | Zircon_sample-036.FIN2 | 281                         | 12  | 415      | 29  | 86       | 6   | 0.7               | 0.619                                            | 0.012            | 0.074                                            | 0.001            | 0.382            | 0.0598                                            | 0.0011           | 489.3                                            | 7.4              | 462.6                                            | 4.9              | 594                                               | 39               |
| 14AP21 | Zircon_sample-026.FIN2 | 218                         | 24  | 267      | 10  | 60       | 2   | 0.8               | 0.617                                            | 0.018            | 0.076                                            | 0.001            | 0.020            | 0.0589                                            | 0.0010           | 488                                              | 11               | 474.2                                            | 5.3              | 564                                               | 39               |
| 14AP21 | Zircon_sample-021.FIN2 | 275                         | 6   | 186      | 4   | 42       | 1   | 1.5               | 0.641                                            | 0.014            | 0.078                                            | 0.001            | 0.424            | 0.0592                                            | 0.0013           | 503                                              | 8.4              | 483.5                                            | 4.4              | 574                                               | 49               |
| 14AP21 | Zircon_Sample-059.FIN2 | 359                         | 70  | 171      | 43  | 39       | 10  | 2.3               | 0.663                                            | 0.024            | 0.078                                            | 0.001            | 0.662            | 0.0613                                            | 0.0019           | 516                                              | 15               | 486.8                                            | 8.1              | 646                                               | 66               |
| 14AP21 | Zircon_sample-046.FIN2 | 132                         | 12  | 153      | 19  | 36       | 3   | 0.8               | 0.670                                            | 0.035            | 0.079                                            | 0.001            | 0.472            | 0.0609                                            | 0.0024           | 520                                              | 21               | 489.1                                            | 6.7              | 654                                               | 76               |
| 14AP21 | Zircon_Sample-114.FIN2 | 206                         | 17  | 51       | 6   | 13       | 1   | 4.1               | 0.642                                            | 0.016            | 0.080                                            | 0.001            | 0.068            | 0.0583                                            | 0.0017           | 503                                              | 10               | 493.9                                            | 5.8              | 535                                               | 62               |
| 14AP21 | Zircon_sample-020.FIN2 | 222                         | 5   | 82       | 2   | 19       | 1   | 2.7               | 0.643                                            | 0.023            | 0.081                                            | 0.001            | 0.053            | 0.0576                                            | 0.0021           | 504                                              | 14               | 502.9                                            | 3.9              | 508                                               | 83               |
| 14AP21 | Zircon_Sample-141.FIN2 | 441                         | 46  | 420      | 66  | 104      | 15  | 1.0               | 0.742                                            | 0.024            | 0.086                                            | 0.001            | 0.467            | 0.0621                                            | 0.0019           | 563                                              | 14               | 533.5                                            | 7.9              | 676                                               | 65               |
| 14AP21 | Zircon_Sample-066.FIN2 | 355                         | 9   | 247      | 16  | 65       | 4   | 1.5               | 0.815                                            | 0.009            | 0.096                                            | 0.001            | 0.310            | 0.0618                                            | 0.0010           | 605.3                                            | 5                | 591.9                                            | 5.1              | 665                                               | 35               |
| 14AP21 | Zircon_Sample-165.FIN2 | 349                         | 45  | 361      | 63  | 95       | 17  | 0.9               | 0.831                                            | 0.032            | 0.102                                            | 0.002            | 0.461            | 0.0599                                            | 0.0018           | 614                                              | 18               | 628.2                                            | 9.3              | 598                                               | 66               |
| 14AP21 | Zircon_Sample-105.FIN2 | 281                         | 32  | 230      | 34  | 59       | 8   | 1.5               | 0.859                                            | 0.030            | 0.103                                            | 0.001            | 0.043            | 0.0618                                            | 0.0024           | 629                                              | 16               | 630.4                                            | 5.8              | 663                                               | 82               |
| 14AP21 | Zircon_Sample-142.FIN2 | 181                         | 12  | 117      | 9   | 36       | 3   | 1.5               | 0.945                                            | 0.036            | 0.108                                            | 0.001            | 0.152            | 0.0625                                            | 0.0024           | 675                                              | 19               | 662.5                                            | 7.6              | 685                                               | 78               |
| 14AP21 | Zircon_Sample-072.FIN2 | 187                         | 5   | 161      | 8   | 59       | 3   | 1.1               | 1.203                                            | 0.019            | 0.128                                            | 0.001            | 0.592            | 0.0681                                            | 0.0011           | 801.7                                            | 8.5              | 777.5                                            | 4.3              | 872                                               | 32               |
| 14AP21 | Zircon_Sample-092.FIN2 | 246                         | 10  | 94       | 3   | 35       | 1   | 2.6               | 1.246                                            | 0.022            | 0.136                                            | 0.002            | 0.373            | 0.0659                                            | 0.0013           | 824.3                                            | 8.5              | 819.3                                            | 9.9              | 802                                               | 41               |
| 14AP21 | Zircon_Sample-193.FIN2 | 254                         | 8   | 197      | 9   | 74       | 3   | 1.3               | 1.254                                            | 0.017            | 0.136                                            | 0.001            | 0.466            | 0.0661                                            | 0.0007           | 825.3                                            | 7.7              | 819.6                                            | 5                | 820                                               | 29               |
| 14AP21 | Zircon_Sample-099.FIN2 | 132                         | 11  | 51       | 3   | 19       | 1   | 2.9               | 1.346                                            | 0.053            | 0.147                                            | 0.002            | 0.735            | 0.0672                                            | 0.0025           | 865                                              | 23               | 882                                              | 10               | 839                                               | 79               |
| 14AP21 | Zircon_Sample-049.FIN2 | 225                         | 23  | 211      | 27  | 101      | 10  | 1.1               | 1.539                                            | 0.037            | 0.157                                            | 0.002            | 0.539            | 0.0697                                            | 0.0012           | 946                                              | 15               | 941.2                                            | 8.1              | 919                                               | 37               |
| 14AP21 | Zircon_Sample-124.FIN2 | 318                         | 16  | 353      | 29  | 146      | 10  | 0.9               | 1.543                                            | 0.021            | 0.158                                            | 0.002            | 0.589            | 0.0712                                            | 0.0009           | 947.8                                            | 8.4              | 943.2                                            | 8.7              | 963                                               | 26               |
| 14AP21 | Zircon_Sample-203.FIN2 | 295                         | 23  | 80       | 4   | 36       | 2   | 3.5               | 1.655                                            | 0.027            | 0.162                                            | 0.002            | 0.752            | 0.0726                                            | 0.0010           | 991                                              | 10               | 968                                              | 13               | 1001                                              | 28               |
| 14AP21 | Zircon_Sample-169.FIN2 | 82                          | 5   | 49       | 4   | 19       | 2   | 1.6               | 1.691                                            | 0.044            | 0.164                                            | 0.002            | 0.701            | 0.0757                                            | 0.0015           | 1005                                             | 16               | 978.1                                            | 8.8              | 1086                                              | 40               |
| 14AP21 | Zircon_Sample-117.FIN2 | 277                         | 45  | 113      | 26  | 58       | 15  | 2.5               | 2.392                                            | 0.091            | 0.178                                            | 0.005            | 0.890            | 0.0976                                            | 0.0013           | 1239                                             | 27               | 1057                                             | 29               | 1577                                              | 25               |
| 14AP21 | Zircon_Sample-113.FIN2 | 284                         | 32  | 36       | 2   | 19       | 1   | 7.5               | 2.058                                            | 0.032            | 0.191                                            | 0.002            | 0.663            | 0.0783                                            | 0.0007           | 1135                                             | 11               | 1125                                             | 13               | 1154                                              | 17               |
| 14AP21 | Zircon_Sample-139.FIN2 | 510                         | 28  | 256      | 27  | 147      | 15  | 2.0               | 2.209                                            | 0.073            | 0.198                                            | 0.006            | 0.913            | 0.0801                                            | 0.0008           | 1183                                             | 23               | 1162                                             | 34               | 1200                                              | 20               |
| 14AP21 | Zircon_Sample-104.FIN2 | 448                         | 28  | 326      | 18  | 183      | 12  | 1.6               | 2.716                                            | 0.065            | 0.222                                            | 0.003            | 0.946            | 0.0896                                            | 0.0014           | 1333                                             | 18               | 1292                                             | 17               | 1416                                              | 29               |
| 14AP21 | Zircon_Sample-164.FIN2 | 235                         | 17  | 80       | 8   | 58       | 3   | 2.9               | 2.640                                            | 0.100            | 0.226                                            | 0.005            | 0.988            | 0.0863                                            | 0.0018           | 1310                                             | 29               | 1311                                             | 24               | 1343                                              | 40               |
| 14AP21 | Zircon_Sample-050.FIN2 | 223                         | 14  | 95       | 5   | 62       | 3   | 2.3               | 2.764                                            | 0.059            | 0.229                                            | 0.003            | 0.823            | 0.0874                                            | 0.0010           | 1345                                             | 16               | 1327                                             | 14               | 1369                                              | 22               |
| 14AP21 | Zircon_sample-014.FIN2 | 185                         | 5   | 77       | 2   | 47       | 1   | 2.4               | 2.778                                            | 0.059            | 0.231                                            | 0.003            | 0.733            | 0.0866                                            | 0.0012           | 1349                                             | 16               | 1342                                             | 17               | 1350                                              | 27               |
| 14AP21 | Zircon_Sample-155.FIN2 | 190                         | 13  | 63       | 2   | 37       | 1   | 3.2               | 2.794                                            | 0.030            | 0.239                                            | 0.003            | 0.577            | 0.0852                                            | 0.0011           | 1353.8                                           | 7.9              | 1383                                             | 15               | 1318                                              | 24               |
| 14AP21 | Zircon_Sample-064.FIN2 | 907                         | 80  | 535      | 29  | 365      | 14  | 1.8               | 3.320                                            | 0.054            | 0.251                                            | 0.003            | 0.786            | 0.0960                                            | 0.0011           | 1485                                             | 13               | 1445                                             | 14               | 1548                                              | 22               |
| 14AP21 | Zircon_Sample-138.FIN2 | 267                         | 21  | 103      | 8   | 73       | 5   | 2.6               | 3.236                                            | 0.057            | 0.258                                            | 0.002            | 0.771            | 0.0                                               |                  |                                                  |                  |                                                  |                  |                                                   |                  |

|        |                        |      |     |      |     |      |     |      |        |       |       |       |       |        |        |        |     |      |    |        |     |
|--------|------------------------|------|-----|------|-----|------|-----|------|--------|-------|-------|-------|-------|--------|--------|--------|-----|------|----|--------|-----|
| 14AP21 | Zircon_Sample-086.FIN2 | 139  | 14  | 69   | 2   | 64   | 2   | 2.0  | 5.390  | 0.220 | 0.344 | 0.011 | 0.976 | 0.1159 | 0.0013 | 1880   | 35  | 1906 | 53 | 1893   | 21  |
| 14AP21 | Zircon_Sample-191.FIN2 | 241  | 38  | 125  | 20  | 108  | 16  | 2.0  | 5.900  | 0.160 | 0.347 | 0.009 | 0.949 | 0.1219 | 0.0011 | 1959   | 24  | 1921 | 43 | 1984   | 16  |
| 14AP21 | Zircon_Sample-202.FIN2 | 117  | 19  | 206  | 53  | 170  | 36  | 0.6  | 5.660  | 0.110 | 0.349 | 0.006 | 0.834 | 0.1172 | 0.0013 | 1925   | 17  | 1929 | 27 | 1913   | 20  |
| 14AP21 | Zircon_Sample-194.FIN2 | 363  | 40  | 194  | 65  | 168  | 57  | 2.6  | 5.619  | 0.085 | 0.350 | 0.006 | 0.932 | 0.1160 | 0.0005 | 1919   | 13  | 1932 | 28 | 1895.1 | 7.7 |
| 14AP21 | Zircon_Sample-209.FIN2 | 119  | 19  | 59   | 6   | 56   | 4   | 2.0  | 5.580  | 0.100 | 0.350 | 0.006 | 0.957 | 0.1144 | 0.0009 | 1913   | 16  | 1933 | 28 | 1871   | 14  |
| 14AP21 | Zircon_Sample-157.FIN2 | 94   | 10  | 166  | 18  | 141  | 9   | 0.6  | 5.597  | 0.097 | 0.361 | 0.004 | 0.772 | 0.1149 | 0.0014 | 1915   | 15  | 1984 | 20 | 1877   | 23  |
| 14AP21 | Zircon_sample-023.FIN2 | 422  | 39  | 325  | 33  | 327  | 24  | 1.3  | 6.530  | 0.150 | 0.363 | 0.007 | 0.964 | 0.1307 | 0.0009 | 2049   | 21  | 1997 | 33 | 2107   | 12  |
| 14AP21 | Zircon_Sample-137.FIN2 | 800  | 190 | 103  | 30  | 91   | 26  | 17.0 | 6.090  | 0.150 | 0.365 | 0.008 | 0.909 | 0.1202 | 0.0012 | 1988   | 21  | 2003 | 37 | 1959   | 18  |
| 14AP21 | Zircon_Sample-189.FIN2 | 148  | 20  | 131  | 37  | 151  | 51  | 1.3  | 7.010  | 0.290 | 0.369 | 0.008 | 0.877 | 0.1365 | 0.0042 | 2110   | 35  | 2022 | 37 | 2179   | 50  |
| 14AP21 | Zircon_Sample-087.FIN2 | 116  | 6   | 49   | 2   | 48   | 2   | 2.3  | 6.293  | 0.077 | 0.375 | 0.003 | 0.646 | 0.1241 | 0.0013 | 2017   | 11  | 2055 | 13 | 2016   | 18  |
| 14AP21 | Zircon_Sample-115.FIN2 | 100  | 4   | 101  | 12  | 101  | 12  | 1.0  | 7.103  | 0.079 | 0.383 | 0.003 | 0.549 | 0.1336 | 0.0013 | 2124.3 | 9.9 | 2091 | 14 | 2146   | 17  |
| 14AP21 | Zircon_Sample-204.FIN2 | 96   | 10  | 45   | 2   | 43   | 2   | 2.1  | 6.924  | 0.079 | 0.389 | 0.007 | 0.780 | 0.1276 | 0.0012 | 2102   | 10  | 2119 | 30 | 2065   | 16  |
| 14AP21 | Zircon_Sample-074.FIN2 | 137  | 5   | 102  | 22  | 110  | 21  | 1.5  | 8.290  | 0.130 | 0.421 | 0.005 | 0.726 | 0.1433 | 0.0014 | 2263   | 14  | 2263 | 21 | 2268   | 17  |
| 14AP21 | Zircon_Sample-177.FIN2 | 725  | 38  | 106  | 14  | 118  | 11  | 7.1  | 11.080 | 0.300 | 0.435 | 0.010 | 0.970 | 0.1826 | 0.0016 | 2528   | 25  | 2328 | 43 | 2677   | 15  |
| 14AP21 | Zircon_sample-040.FIN2 | 423  | 10  | 281  | 34  | 302  | 38  | 1.6  | 10.010 | 0.280 | 0.438 | 0.008 | 0.801 | 0.1647 | 0.0022 | 2435   | 26  | 2342 | 34 | 2504   | 23  |
| 14AP21 | Zircon_sample-035.FIN2 | 513  | 67  | 242  | 72  | 261  | 73  | 2.9  | 10.270 | 0.260 | 0.437 | 0.008 | 0.966 | 0.1666 | 0.0011 | 2458   | 23  | 2348 | 41 | 2524   | 11  |
| 14AP21 | Zircon_Sample-140.FIN2 | 509  | 27  | 395  | 15  | 457  | 20  | 1.3  | 11.250 | 0.230 | 0.443 | 0.009 | 0.959 | 0.1822 | 0.0007 | 2543   | 19  | 2364 | 39 | 2672.5 | 6.7 |
| 14AP21 | Zircon_Sample-052.FIN2 | 1731 | 83  | 1460 | 250 | 1470 | 190 | 1.2  | 10.260 | 0.320 | 0.447 | 0.012 | 0.918 | 0.1679 | 0.0011 | 2457   | 29  | 2383 | 53 | 2537   | 11  |
| 14AP21 | Zircon_Sample-078.FIN2 | 940  | 150 | 610  | 140 | 670  | 140 | 1.6  | 10.890 | 0.160 | 0.455 | 0.006 | 0.850 | 0.1762 | 0.0015 | 2514   | 14  | 2417 | 27 | 2617   | 15  |
| 14AP21 | Zircon_Sample-156.FIN2 | 608  | 31  | 538  | 36  | 585  | 39  | 1.2  | 12.200 | 0.270 | 0.457 | 0.007 | 0.920 | 0.1961 | 0.0017 | 2619   | 21  | 2427 | 33 | 2794   | 14  |
| 14AP21 | Zircon_sample-013.FIN2 | 494  | 60  | 407  | 83  | 438  | 71  | 1.3  | 11.160 | 0.590 | 0.464 | 0.020 | 0.990 | 0.1741 | 0.0021 | 2543   | 47  | 2454 | 88 | 2597   | 20  |
| 14AP21 | Zircon_Sample-166.FIN2 | 69   | 8   | 81   | 11  | 95   | 11  | 0.8  | 10.900 | 0.310 | 0.475 | 0.010 | 0.881 | 0.1704 | 0.0024 | 2513   | 26  | 2503 | 45 | 2572   | 23  |
| 14AP21 | Zircon_sample-027.FIN2 | 450  | 9   | 282  | 7   | 361  | 10  | 1.6  | 11.660 | 0.280 | 0.481 | 0.007 | 0.894 | 0.1771 | 0.0016 | 2576   | 21  | 2531 | 30 | 2626   | 15  |
| 14AP21 | Zircon_Sample-176.FIN2 | 173  | 14  | 259  | 23  | 314  | 26  | 0.7  | 12.290 | 0.180 | 0.494 | 0.005 | 0.918 | 0.1799 | 0.0012 | 2626   | 14  | 2590 | 23 | 2652   | 11  |
| 14AP21 | Zircon_Sample-181.FIN2 | 73   | 2   | 34   | 2   | 42   | 2   | 2.1  | 13.020 | 0.150 | 0.497 | 0.005 | 0.903 | 0.1890 | 0.0014 | 2681   | 11  | 2600 | 23 | 2733   | 12  |
| 14AP21 | Zircon_sample-008.FIN2 | 290  | 18  | 330  | 19  | 397  | 16  | 0.9  | 12.630 | 0.250 | 0.498 | 0.008 | 0.892 | 0.1830 | 0.0016 | 2652   | 19  | 2604 | 35 | 2680   | 14  |
| 14AP21 | Zircon_sample-038.FIN2 | 291  | 11  | 306  | 9   | 375  | 11  | 0.9  | 12.970 | 0.130 | 0.498 | 0.004 | 0.902 | 0.1877 | 0.0015 | 2677.3 | 9.1 | 2604 | 17 | 2722   | 13  |
| 14AP21 | Zircon_Sample-131.FIN2 | 716  | 64  | 428  | 35  | 544  | 38  | 1.6  | 12.630 | 0.150 | 0.499 | 0.007 | 0.846 | 0.1814 | 0.0012 | 2652   | 11  | 2611 | 28 | 2666   | 11  |
| 14AP21 | Zircon_Sample-168.FIN2 | 204  | 15  | 159  | 22  | 197  | 25  | 1.2  | 12.850 | 0.220 | 0.510 | 0.007 | 0.886 | 0.1859 | 0.0018 | 2668   | 17  | 2656 | 31 | 2706   | 16  |
| 14AP21 | Zircon_Sample-073.FIN2 | 141  | 7   | 70   | 11  | 84   | 10  | 1.9  | 11.150 | 0.230 | 0.511 | 0.011 | 0.958 | 0.1587 | 0.0015 | 2535   | 19  | 2662 | 46 | 2442   | 16  |
| 14AP21 | Zircon_Sample-183.FIN2 | 122  | 20  | 63   | 15  | 75   | 18  | 1.9  | 12.470 | 0.210 | 0.513 | 0.007 | 0.903 | 0.1746 | 0.0018 | 2640   | 16  | 2670 | 30 | 2602   | 17  |
| 14AP21 | Zircon_Sample-180.FIN2 | 148  | 5   | 89   | 11  | 104  | 16  | 1.7  | 14.010 | 0.270 | 0.517 | 0.007 | 0.835 | 0.1943 | 0.0027 | 2750   | 18  | 2684 | 29 | 2784   | 20  |
| 14AP21 | Zircon_Sample-206.FIN2 | 161  | 20  | 118  | 17  | 148  | 18  | 1.4  | 13.660 | 0.270 | 0.523 | 0.010 | 0.915 | 0.1881 | 0.0011 | 2726   | 19  | 2710 | 42 | 2725.3 | 9.4 |
| 14AP21 | Zircon_Sample-195.FIN2 | 397  | 43  | 237  | 36  | 292  | 57  | 1.8  | 14.610 | 0.140 | 0.523 | 0.004 | 0.904 | 0.2003 | 0.0009 | 2790.1 | 9.2 | 2713 | 18 | 2828.4 | 7.4 |
| 14AP21 | Zircon_Sample-090.FIN2 | 136  | 44  | 55   | 12  | 75   | 14  | 2.1  | 13.020 | 0.280 | 0.530 | 0.013 | 0.909 | 0.1826 | 0.0017 | 2680   | 21  | 2739 | 56 | 2677   | 15  |
| 14AP21 | Zircon_Sample-207.FIN2 | 205  | 11  | 93   | 4   | 122  | 5   | 2.2  | 14.260 | 0.160 | 0.530 | 0.005 | 0.915 | 0.1924 | 0.0011 | 2767   | 11  | 2742 | 23 | 2762.6 | 9.8 |
| 14AP21 | Zircon_Sample-060.FIN2 | 119  | 22  | 138  | 36  | 185  | 43  | 0.9  | 13.610 | 0.400 | 0.531 | 0.013 | 0.914 | 0.1868 | 0.0020 | 2722   | 28  | 2746 | 55 | 2713   | 18  |
| 14AP21 | Zircon_Sample-061.FIN2 | 147  | 17  | 145  | 16  | 190  | 13  | 1.1  | 14.260 | 0.390 | 0.547 | 0.014 | 0.939 | 0.1899 | 0.0016 | 2766   | 26  | 2826 | 56 | 2741   | 14  |
| 14AP21 | Zircon_Sample-170.FIN2 | 192  | 12  | 95   | 3   | 129  | 3   | 2.0  | 15.900 | 0.230 | 0.570 | 0.007 | 0.914 | 0.2041 | 0.0013 | 2871   | 14  | 2906 | 29 | 2859   | 11  |
| 14AP21 | Zircon_Sample-190.FIN2 | 290  | 20  | 22   | 4   | 31   | 4   | 15.0 | 15.590 | 0.340 | 0.578 | 0.010 | 0.834 | 0.1956 | 0.0025 | 2851   | 21  | 2939 | 40 | 2789   | 21  |
| 14AP21 | Zircon_Sample-167.FIN2 | 445  | 21  | 101  | 30  | 138  | 36  | 6.5  | 17.020 | 0.230 | 0.579 | 0.008 | 0.921 | 0.2146 | 0.0013 | 2936   | 13  | 2942 | 34 | 2940   | 10  |

<sup>a</sup>U, Th and Pb concentrations with errors (2SE) and U/Th ratios are calculated relative to the Harvard 91500 reference zircon

<sup>b</sup>Corrected for background, downhole and within-run Pb/U fractionation. Normalised to the reference zircon Harvard 91500 (TIMS/measured values). The <sup>207</sup>Pb/<sup>235</sup>U is calculated through: (<sup>207</sup>Pb/<sup>206</sup>Pb)/(<sup>238</sup>U/<sup>206</sup>Pb \* 1/137.88)

<sup>c</sup>Rho is the error correlation defined as the quotient of the propagated errors of the <sup>206</sup>Pb/<sup>238</sup>U and <sup>207</sup>Pb/<sup>235</sup>U ratios

<sup>d</sup>Quadratic addition of within-run errors (2 SE) and the all-session reproducibility of Harvard-91500, GJ-1 and Plesovice zircon reference materials (2 SE)

<sup>e</sup>Normalised to the Harvard 91500 reference zircon

14AP24

|        |                         | CONCENTRATIONS <sup>a</sup> |            |          |            |          |            | RATIOS            |                                                  |                         |                                                  |                         |               |                                                   |                         | AGES                                             |                         |                                                  |                         |                                                   |                         |
|--------|-------------------------|-----------------------------|------------|----------|------------|----------|------------|-------------------|--------------------------------------------------|-------------------------|--------------------------------------------------|-------------------------|---------------|---------------------------------------------------|-------------------------|--------------------------------------------------|-------------------------|--------------------------------------------------|-------------------------|---------------------------------------------------|-------------------------|
| Sample | Analysis                | U [ppm]                     | 2 $\sigma$ | Th [ppm] | 2 $\sigma$ | Pb [ppm] | 2 $\sigma$ | U/Th <sup>a</sup> | <sup>207</sup> Pb/ <sup>235</sup> U <sup>b</sup> | 2 $\sigma$ <sup>d</sup> | <sup>206</sup> Pb/ <sup>238</sup> U <sup>b</sup> | 2 $\sigma$ <sup>d</sup> | $\rho_{ho}^c$ | <sup>207</sup> Pb/ <sup>206</sup> Pb <sup>e</sup> | 2 $\sigma$ <sup>d</sup> | <sup>207</sup> Pb/ <sup>235</sup> U <sup>b</sup> | 2 $\sigma$ <sup>d</sup> | <sup>206</sup> Pb/ <sup>238</sup> U <sup>b</sup> | 2 $\sigma$ <sup>d</sup> | <sup>207</sup> Pb/ <sup>206</sup> Pb <sup>e</sup> | 2 $\sigma$ <sup>d</sup> |
| 14AP24 | Zircon_Sample-049.FIN2  | 1530                        | 220        | 520      | 120        | 27       | 6          | 3.1               | 0.136                                            | 0.009                   | 0.018                                            | 0.000                   | 0.816         | 0.0559                                            | 0.0033                  | 129.3                                            | 7.6                     | 111.9                                            | 1.7                     | 440                                               | 130                     |
| 14AP24 | Zircon_Sample-100.FIN2  | 506                         | 45         | 106      | 21         | 6        | 1          | 10.5              | 0.133                                            | 0.008                   | 0.019                                            | 0.000                   | 0.027         | 0.0505                                            | 0.0038                  | 126.9                                            | 7.3                     | 119.7                                            | 1.9                     | 210                                               | 170                     |
| 14AP24 | Zircon_Sample-157.FIN2  | 293                         | 23         | 309      | 24         | 23       | 2          | 0.8               | 0.210                                            | 0.025                   | 0.024                                            | 0.001                   | 0.084         | 0.0616                                            | 0.0089                  | 193                                              | 21                      | 154.7                                            | 4.8                     | 610                                               | 300                     |
| 14AP24 | Zircon_Sample-137.FIN2  | 179                         | 20         | 379      | 62         | 43       | 5          | 0.5               | 0.343                                            | 0.018                   | 0.043                                            | 0.001                   | 0.651         | 0.0578                                            | 0.0029                  | 300                                              | 13                      | 272.4                                            | 5.1                     | 510                                               | 110                     |
| 14AP24 | Zircon_Sample-077.FIN2  | 1326                        | 68         | 980      | 60         | 106      | 4          | 1.4               | 0.387                                            | 0.017                   | 0.044                                            | 0.001                   | 0.794         | 0.0631                                            | 0.0018                  | 332                                              | 12                      | 275.9                                            | 4.3                     | 728                                               | 68                      |
| 14AP24 | Zircon_Sample-138.FIN2  | 1574                        | 77         | 430      | 120        | 54       | 14         | 4.2               | 0.379                                            | 0.029                   | 0.044                                            | 0.000                   | 0.243         | 0.0613                                            | 0.0046                  | 326                                              | 21                      | 280.2                                            | 2.8                     | 640                                               | 160                     |
| 14AP24 | Zircon_Sample-063.FIN2  | 674                         | 60         | 74       | 19         | 13       | 1          | 9.8               | 0.562                                            | 0.029                   | 0.068                                            | 0.001                   | 0.587         | 0.0590                                            | 0.0019                  | 453                                              | 18                      | 423.5                                            | 7.4                     | 565                                               | 67                      |
| 14AP24 | Zircon_Sample-151.FIN2  | 527                         | 79         | 440      | 100        | 79       | 16         | 1.1               | 0.609                                            | 0.021                   | 0.071                                            | 0.002                   | 0.681         | 0.0626                                            | 0.0014                  | 483                                              | 13                      | 440                                              | 13                      | 693                                               | 49                      |
| 14AP24 | Zircon_Sample-105.FIN2  | 358                         | 33         | 414      | 61         | 72       | 10         | 1.6               | 0.577                                            | 0.033                   | 0.071                                            | 0.001                   | 0.530         | 0.0590                                            | 0.0029                  | 462                                              | 20                      | 441.5                                            | 7.1                     | 556                                               | 95                      |
| 14AP24 | Zircon_Sample-129.FIN2  | 485                         | 15         | 113      | 6          | 23       | 1          | 3.6               | 0.575                                            | 0.017                   | 0.073                                            | 0.001                   | 0.315         | 0.0571                                            | 0.0017                  | 461                                              | 11                      | 452.2                                            | 3.6                     | 491                                               | 65                      |
| 14AP24 | Zircon_Sample-142.FIN2  | 198                         | 29         | 600      | 100        | 83       | 14         | 0.5               | 0.621                                            | 0.010                   | 0.074                                            | 0.002                   | 0.568         | 0.0610                                            | 0.0013                  | 490.3                                            | 6.1                     | 457                                              | 11                      | 638                                               | 46                      |
| 14AP24 | Zircon_sample-046.FIN2  | 740                         | 100        | 370      | 69         | 77       | 16         | 2.0               | 0.623                                            | 0.020                   | 0.074                                            | 0.001                   | 0.748         | 0.0600                                            | 0.0011                  | 491                                              | 13                      | 461.5                                            | 7                       | 600                                               | 41                      |
| 14AP24 | Zircon_Sample-193.FIN2  | 885                         | 66         | 612      | 45         | 134      | 9          | 1.4               | 0.646                                            | 0.013                   | 0.077                                            | 0.001                   | 0.362         | 0.0611                                            | 0.0014                  | 505.8                                            | 7.9                     | 478.6                                            | 5.4                     | 651                                               | 44                      |
| 14AP24 | Zircon_Sample-205.FIN2  | 692                         | 42         | 383      | 33         | 83       | 6          | 1.5               | 0.639                                            | 0.024                   | 0.080                                            | 0.001                   | 0.920         | 0.0577                                            | 0.0014                  | 502                                              | 15                      | 495.9                                            | 7.4                     | 517                                               | 52                      |
| 14AP24 | Zircon_Sample-153.FIN2  | 1250                        | 150        | 249      | 21         | 55       | 8          | 4.1               | 0.860                                            | 0.029                   | 0.081                                            | 0.002                   | 0.886         | 0.0762                                            | 0.0013                  | 630                                              | 16                      | 505                                              | 14                      | 1100                                              | 34                      |
| 14AP24 | Zircon_sample-027.FIN2  | 194                         | 7          | 72       | 4          | 17       | 0          | 2.7               | 0.675                                            | 0.022                   | 0.083                                            | 0.002                   | 0.190         | 0.0589                                            | 0.0024                  | 523                                              | 13                      | 511.6                                            | 8.9                     | 558                                               | 87                      |
| 14AP24 | Zircon_Samples-165.FIN2 | 275                         | 28         | 354      | 76         | 60       | 11         | 1.0               | 0.743                                            | 0.050                   | 0.083                                            | 0.001                   | 0.097         | 0.0645                                            | 0.0041                  | 563                                              | 29                      | 516.3                                            | 6.8                     | 750                                               | 140                     |
| 14AP24 | Zircon_sample-034.FIN2  | 190                         | 31         | 137      | 17         | 27       | 4          | 1.4               | 0.680                                            | 0.022                   | 0.084                                            | 0.002                   | 0.416         | 0.0577                                            | 0.0016                  | 526                                              | 14                      | 520.2                                            | 9.9                     | 515                                               | 59                      |
| 14AP24 | Zircon_Sample-139.FIN2  | 494                         | 18         | 945      | 39         | 203      | 7          | 0.7               | 0.700                                            | 0.018                   | 0.086                                            | 0.001                   | 0.716         | 0.0585                                            | 0.0009                  | 538                                              | 11                      | 533.5                                            | 4.2                     | 562                                               | 40                      |
| 14AP24 | Zircon_Sample-141.FIN2  | 522                         | 14         | 381      | 26         | 79       | 5          | 2.1               | 0.745                                            | 0.017                   | 0.090                                            | 0.001                   | 0.181         | 0.0600                                            | 0.0014                  | 565                                              | 10                      | 555.9                                            | 5.8                     | 598                                               | 52                      |
| 14AP24 | Zircon_Sample-103.FIN2  | 214                         | 7          | 235      | 14         | 45       | 2          | 2.0               | 0.819                                            | 0.022                   | 0.093                                            | 0.002                   | 0.742         | 0.0638                                            | 0.0017                  | 607                                              | 12                      | 571                                              | 12                      | 733                                               | 56                      |
| 14AP24 | Zircon_sample-040.FIN2  | 1518                        | 75         | 1083     | 72         | 207      | 3          | 1.4               | 1.266                                            | 0.030                   | 0.102                                            | 0.003                   | 0.663         | 0.0891                                            | 0.0025                  | 830                                              | 14                      | 628                                              | 17                      | 1405                                              | 53                      |
| 14AP24 | Zircon_Sample-104.FIN2  | 708                         | 24         | 231      | 11         | 54       | 2          | 6.1               | 0.884                                            | 0.017                   | 0.104                                            | 0.002                   | 0.770         | 0.0613                                            | 0.0010                  | 643.1                                            | 9.2                     | 638.3                                            | 9.4                     | 647                                               | 36                      |
| 14AP24 | Zircon_sample-009.FIN2  | 246                         | 23         | 159      | 9          | 40       | 1          | 1.6               | 0.906                                            | 0.020                   | 0.105                                            | 0.002                   | 0.176         | 0.0619                                            | 0.0015                  | 655                                              | 10                      | 645.8                                            | 9.7                     | 668                                               | 52                      |
| 14AP24 | Zircon_Sample-033.FIN2  | 57                          | 9          | 26       | 4          | 8        | 1          | 2.1               | 1.043                                            | 0.053                   | 0.111                                            | 0.002                   | 0.487         | 0.0667                                            | 0.0028                  | 724                                              | 26                      | 680                                              | 13                      | 845                                               | 96                      |
| 14AP24 | Zircon_sample-035.FIN2  | 313                         | 66         | 269      | 96         | 94       | 29         | 1.3               | 1.118                                            | 0.023                   | 0.123                                            | 0.002                   | 0.787         | 0.0660                                            | 0.0015                  | 762                                              | 11                      | 745                                              | 13                      | 804                                               | 49                      |
| 14AP24 | Zircon_sample-038.FIN2  | 203                         | 7          | 153      | 7          | 51       | 3          | 1.4               | 1.164                                            | 0.017                   | 0.127                                            | 0.001                   | 0.279         | 0.0663                                            | 0.0010                  | 783.8                                            | 8.2                     | 769.5                                            | 7.2                     | 814                                               | 31                      |
| 14AP24 | Zircon_sample-039.FIN2  | 139                         | 8          | 87       | 7          | 29       | 2          | 1.6               | 1.209                                            | 0.045                   | 0.130                                            | 0.002                   | 0.770         | 0.0676                                            | 0.0016                  | 804                                              | 21                      | 787                                              | 12                      | 855                                               | 50                      |
| 14AP24 | Zircon_Sample-052.FIN2  | 636                         | 21         | 179      | 9          | 60       | 3          | 3.7               | 1.348                                            | 0.031                   | 0.134                                            | 0.003                   | 0.836         | 0.0722                                            | 0.0006                  | 866                                              | 14                      | 810                                              | 16                      | 990                                               | 16                      |
| 14AP24 | Zircon_sample-011.FIN2  | 358                         | 13         | 136      | 21         | 47       | 5          | 2.9               | 1.282                                            | 0.038                   | 0.136                                            | 0.003                   | 0.824         | 0.0666                                            | 0.0021                  | 837                                              | 17                      | 821                                              | 14                      | 824                                               | 67                      |
| 14AP24 | Zircon_Sample-118.FIN2  | 466                         | 43         | 187      | 30         | 64       | 8          | 2.8               | 1.535                                            | 0.047                   | 0.152                                            | 0.002                   | 0.482         | 0.0715                                            | 0.0020                  | 944                                              | 19                      | 913                                              | 13                      | 969                                               | 58                      |
| 14AP24 | Zircon_Sample-177.FIN2  | 780                         | 120        | 401      | 80         | 169      | 31         | 2.4               | 1.529                                            | 0.025                   | 0.153                                            | 0.001                   | 0.341         | 0.0725                                            | 0.0014                  | 942                                              | 10                      | 915.1                                            | 5.9                     | 997                                               | 38                      |
| 14AP24 | Zircon_Sample-075.FIN2  | 515                         | 52         | 129      | 28         | 48       | 15         | 4.2               | 1.816                                            | 0.038                   | 0.155                                            | 0.004                   | 0.894         | 0.0837                                            | 0.0014                  | 1051                                             | 14                      | 926                                              | 21                      | 1295                                              | 29                      |
| 14AP24 | Zircon_Sample-191.FIN2  | 786                         | 85         | 85       | 11         | 37       | 4          | 8.2               | 1.518                                            | 0.026                   | 0.155                                            | 0.001                   | 0.409         | 0.0713                                            | 0.0009                  | 937                                              | 10                      | 929.5                                            | 7.1                     | 964                                               | 25                      |
| 14AP24 | Zircon_Sample-061.FIN2  | 545                         | 18         | 86       | 4          | 35       | 2          | 6.3               | 1.544                                            | 0.039                   | 0.156                                            | 0.002                   | 0.750         | 0.0716                                            | 0.0013                  | 948                                              | 15                      | 935                                              | 11                      | 973                                               | 37                      |
| 14AP24 | Zircon_Sample-117.FIN2  | 164                         | 24         | 237      | 23         | 66       | 10         | 0.8               | 1.650                                            | 0.110                   | 0.160                                            | 0.005                   | 0.213         | 0.0769                                            | 0.0062                  | 1006                                             | 52                      | 955                                              | 29                      | 1100                                              | 160                     |
| 14AP24 | Zircon_Sample-209.FIN2  | 536                         | 35         | 140      | 36         | 64       | 18         | 2.5               | 1.572                                            | 0.045                   | 0.162                                            | 0.002                   | 0.083         | 0.0706                                            | 0.0023                  | 959                                              | 18                      | 966                                              | 12                      | 943                                               | 68                      |
| 14AP24 | Zircon_Sample-155.FIN2  | 490                         | 43         | 72       | 5          | 39       | 3          | 5.4               | 1.969                                            | 0.040                   | 0.168                                            | 0.002                   | 0.579         | 0.0856                                            | 0.0011                  | 1105                                             | 14                      | 998.2                                            | 9.6                     | 1329                                              | 25                      |
| 14AP24 | Zircon_Sample-091.FIN2  | 305                         | 90         | 148      | 47         | 96       | 33         | 1.7               | 2.330                                            | 0.230                   | 0.180                                            | 0.016                   | 0.982         | 0.0921                                            | 0.0019                  | 1211                                             | 71                      | 1066                                             | 86                      | 1467                                              | 40                      |
| 14AP24 | Zircon_sample-025.FIN2  | 500                         | 110        | 67       | 12         | 30       | 5          | 7.4               | 2.219                                            | 0.082                   | 0.184                                            | 0.002                   | 0.933         | 0.0869                                            | 0.0023                  | 1187                                             | 26                      | 1087                                             | 12                      | 1358                                              | 52                      |
| 14AP24 | Zircon_Sample-195.FIN2  | 453                         | 21         | 88       | 23         | 39       | 3          | 5.4               | 2.100                                            | 0.084                   | 0.187                                            | 0.007                   | 0.876         | 0.0820                                            | 0.0006                  | 1148                                             | 28                      | 1105                                             | 36                      | 1246                                              | 15                      |
| 14AP24 | Zircon_Sample-090.FIN2  | 1325                        | 87         | 875      | 90         | 420      | 24         | 1.1               | 2.565                                            | 0.094                   | 0.188                                            | 0.006                   | 0.944         | 0.0984                                            | 0.0012                  | 1290                                             | 27                      | 1109                                             | 33                      | 1594                                              | 23                      |
| 14AP24 | Zircon_Sample-189.FIN2  | 1780                        | 210        | 1050     | 250        | 457      | 72         | 1.6               | 2.380                                            | 0.130                   | 0.188                                            | 0.011                   | 0.964         | 0.0918                                            | 0.0012                  | 1235                                             | 39                      | 1109                                             | 57                      | 1463                                              | 25                      |
| 14AP24 | Zircon_Sample-116.FIN2  | 570                         | 44         | 68       | 8          | 32       | 3          | 8.8               | 2.034                                            | 0.037                   | 0.188                                            | 0.002                   | 0.652         | 0.0780                                            | 0.0011                  | 1130                                             | 12                      | 1113                                             | 12                      | 1146                                              | 28                      |
| 14AP24 | Zircon_Sample-073.FIN2  | 289                         | 40         | 94       | 13         | 46       | 4          | 3.1               | 2.660                                            | 0.170                   | 0.193                                            | 0.011                   | 0.946         | 0.1000                                            | 0.0016                  | 1316                                             | 48                      | 1139                                             | 58                      | 1624                                              | 29                      |
| 14AP24 | Zircon_Sample-125.FIN2  | 367                         | 21         | 238      | 28         | 117      | 15         | 1.3               | 2.189                                            | 0.031                   | 0.197                                            | 0.002                   | 0.892         | 0.0803                                            | 0.0007                  | 1178                                             | 10                      | 1160.5                                           | 9.4                     | 1205                                              | 17                      |
| 14AP24 | Zircon_Sample-092.FIN2  | 363                         | 11         | 78       | 3          | 48       | 2          | 3.4               | 2.307                                            | 0.021                   | 0.204                                            | 0.002                   | 0.625         | 0.0815                                            | 0.0006                  | 1214.4                                           | 6.4                     | 1196.4                                           | 8.6                     | 1234                                              | 14                      |
| 14AP24 | Zircon_Sample-060.FIN2  | 120                         | 19         | 41       | 4          | 21       | 2          | 2.9               | 2.105                                            | 0.059                   | 0.205                                            | 0.003                   | 0.368         | 0.0744                                            | 0.0028                  | 1150                                             | 19                      | 1200                                             | 14                      | 1050                                              | 77                      |
| 14AP24 | Zircon_Sample-168.FIN2  | 1310                        | 150        | 1240     | 200        | 470      | 78         | 1.4               | 2.586                                            | 0.061                   | 0.208                                            | 0.004                   | 0.867         | 0.0907                                            | 0.0009                  | 1296                                             | 17                      | 1217                                             | 20                      | 1440                                              | 20                      |
| 14AP24 | Zircon_Sample-182.FIN2  | 697                         | 64         | 416      | 51         | 233      | 24         | 1.9               | 2.634                                            | 0.055                   | 0.219                                            | 0.005                   | 0.885         | 0.0866                                            | 0.0008                  | 1310                                             | 16                      | 1277                                             | 26                      | 1351                                              | 17                      |
| 14AP24 | Zircon_sample-024.FIN2  | 337                         | 19         | 134      | 17         | 72       | 4          | 2.4               | 2.820                                            | 0.170                   | 0.216                                            | 0.019                   | 0.986         | 0.0900                                            | 0.0013                  | 1356                                             | 48                      | 1281                                             | 94                      | 1425                                              | 28                      |
| 14AP24 | Zircon_Sample-072.FIN2  | 203                         | 9          | 134      | 7          | 75       | 4          | 1.5               | 2.713                                            | 0.074                   | 0.226                                            | 0.002                   | 0.560         | 0.0866                                            | 0.0020                  | 1331                                             | 20                      | 1314.6                                           | 9.2                     | 1349                                              | 45                      |
| 14AP24 | Zircon_Sample-076.FIN2  | 176                         | 10         | 235      | 48         | 116      | 23         | 0.8               | 2.860                                            | 0.093                   | 0.227                                            | 0.011                   | 0.954         | 0.0893                                            | 0.0012                  | 1370                                             | 25                      | 1315                                             | 58                      | 1409                                              | 27                      |
| 14AP24 | Zircon_Sample-204.FIN2  | 347                         | 28         | 267      | 25         | 173      | 13         | 1.1               | 2.692                                            | 0.081                   | 0.229                                            | 0.008                   | 0.948         | 0.0850                                            | 0.0011                  | 1325                                             | 22                      | 1329                                             | 42                      | 1315                                              | 24                      |
| 14AP24 | Zircon_Sample-124.FIN2  | 162                         | 11         | 68       | 6          | 41       | 3          | 2.0               | 2.699                                            | 0.053                   | 0.229                                            | 0.002                   | 0.510         | 0.0849                                            | 0.0012                  | 1328                                             | 15                      | 1331                                             | 11                      | 1311                                              | 28                      |
| 14AP24 | Zircon_Sample-163.FIN2  | 3570                        | 230        | 1910     | 260        | 644      | 72         | 2.1               | 3.990                                            | 0.100                   | 0.239                                            | 0.007                   | 0.978         | 0.1209                                            | 0.0009                  | 1632                                             | 20                      | 1379                                             | 38                      | 1970                                              | 13                      |
| 14AP24 | Zircon_Sample-154.FIN2  | 157                         | 10         | 60       | 4          | 39       | 2          | 2.2               | 2.972                                            | 0.066                   | 0.241                                            | 0.003                   | 0.599         | 0.0886                                            | 0.0015                  | 1400                                             | 17                      | 1390                                             | 17                      | 1394                                              | 32                      |
| 14AP24 | Zircon_Sample-140.FIN2  | 465                         | 21         | 252      | 17         | 138      | 4          | 2.7               | 3.141                                            | 0.045                   | 0.246                                            | 0.002                   | 0.355         | 0.0917                                            | 0.0010                  | 1443                                             | 11                      | 1416                                             | 12                      | 1462                                              | 21                      |
| 14AP24 | Zircon_Sample-143.FIN2  | 161                         | 9          | 273      | 14         | 140      | 12         | 1.0               | 3.520                                            | 0.170                   | 0.258                                            |                         |               |                                                   |                         |                                                  |                         |                                                  |                         |                                                   |                         |



|                                  |                        |      |     |     |     |      |     |      |        |       |       |       |       |        |        |        |     |      |     |        |     |
|----------------------------------|------------------------|------|-----|-----|-----|------|-----|------|--------|-------|-------|-------|-------|--------|--------|--------|-----|------|-----|--------|-----|
| 14AP24                           | Zircon_Sample-085.FIN2 | 320  | 27  | 124 | 7   | 93   | 5   | 2.1  | 5.310  | 0.100 | 0.333 | 0.005 | 0.836 | 0.1149 | 0.0015 | 1870   | 16  | 1853 | 22  | 1877   | 24  |
| 14AP24                           | Zircon_Sample-206.FIN2 | 950  | 110 | 133 | 7   | 122  | 5   | 5.5  | 5.325  | 0.089 | 0.334 | 0.005 | 0.936 | 0.1156 | 0.0007 | 1872   | 14  | 1860 | 23  | 1890   | 11  |
| 14AP24                           | Zircon_Sample-196.FIN2 | 362  | 14  | 397 | 21  | 347  | 19  | 0.9  | 5.270  | 0.076 | 0.336 | 0.003 | 0.753 | 0.1131 | 0.0009 | 1864   | 12  | 1867 | 16  | 1849   | 14  |
| 14AP24                           | Zircon_Sample-051.FIN2 | 127  | 8   | 94  | 11  | 88   | 10  | 1.4  | 5.660  | 0.110 | 0.339 | 0.006 | 0.554 | 0.1214 | 0.0027 | 1924   | 17  | 1880 | 28  | 1975   | 39  |
| 14AP24                           | Zircon_Sample-152.FIN2 | 1469 | 41  | 297 | 13  | 278  | 8   | 4.1  | 5.496  | 0.045 | 0.342 | 0.003 | 0.593 | 0.1157 | 0.0009 | 1904.2 | 6.6 | 1898 | 14  | 1891   | 14  |
| 14AP24                           | Zircon_Sample-150.FIN2 | 771  | 76  | 453 | 18  | 386  | 31  | 1.6  | 5.890  | 0.063 | 0.343 | 0.004 | 0.875 | 0.1240 | 0.0006 | 1959.7 | 9.4 | 1901 | 17  | 2014.8 | 8.9 |
| 14AP24                           | Zircon_Sample-089.FIN2 | 397  | 92  | 113 | 23  | 83   | 18  | 2.4  | 5.890  | 0.190 | 0.349 | 0.011 | 0.953 | 0.1217 | 0.0009 | 1958   | 28  | 1929 | 51  | 1981   | 13  |
| 14AP24                           | Zircon_Sample-181.FIN2 | 1990 | 130 | 300 | 18  | 261  | 12  | 7.8  | 5.465  | 0.062 | 0.350 | 0.003 | 0.835 | 0.1132 | 0.0008 | 1894.9 | 9.8 | 1934 | 15  | 1851   | 12  |
| 14AP24                           | Zircon_Sample-202.FIN2 | 250  | 25  | 243 | 23  | 224  | 18  | 1.0  | 6.168  | 0.079 | 0.365 | 0.005 | 0.908 | 0.1224 | 0.0007 | 2000   | 11  | 2003 | 23  | 1992   | 11  |
| 14AP24                           | Zircon_Sample-014.FIN2 | 280  | 110 | 39  | 15  | 29   | 11  | 7.3  | 5.440  | 0.620 | 0.372 | 0.043 | 0.993 | 0.1055 | 0.0014 | 1875   | 93  | 2030 | 200 | 1722   | 25  |
| 14AP24                           | Zircon_Sample-111.FIN2 | 494  | 51  | 395 | 62  | 344  | 21  | 1.1  | 10.780 | 0.630 | 0.375 | 0.021 | 0.991 | 0.2063 | 0.0021 | 2500   | 58  | 2049 | 99  | 2877   | 17  |
| 14AP24                           | Zircon_Sample-190.FIN2 | 1382 | 85  | 716 | 43  | 513  | 31  | 1.6  | 9.640  | 0.440 | 0.381 | 0.017 | 0.985 | 0.1829 | 0.0011 | 2397   | 43  | 2077 | 78  | 2679.6 | 9.7 |
| 14AP24                           | Zircon_Sample-013.FIN2 | 160  | 41  | 145 | 41  | 124  | 32  | 1.2  | 7.190  | 0.600 | 0.388 | 0.021 | 0.939 | 0.1279 | 0.0023 | 2130   | 71  | 2111 | 96  | 2069   | 32  |
| 14AP24                           | Zircon_Sample-047.FIN2 | 428  | 98  | 280 | 120 | 211  | 59  | 1.8  | 11.000 | 1.000 | 0.391 | 0.032 | 0.995 | 0.2020 | 0.0026 | 2513   | 89  | 2120 | 150 | 2842   | 21  |
| 14AP24                           | Zircon_Sample-166.FIN2 | 521  | 45  | 307 | 46  | 285  | 45  | 2.2  | 9.190  | 0.340 | 0.418 | 0.009 | 0.931 | 0.1577 | 0.0024 | 2355   | 35  | 2250 | 43  | 2439   | 20  |
| 14AP24                           | Zircon_Sample-176.FIN2 | 725  | 34  | 323 | 28  | 339  | 14  | 2.6  | 10.180 | 0.430 | 0.431 | 0.018 | 0.963 | 0.1705 | 0.0015 | 2449   | 40  | 2307 | 83  | 2562   | 15  |
| 14AP24                           | Zircon_Sample-074.FIN2 | 1150 | 150 | 328 | 68  | 304  | 60  | 3.4  | 10.620 | 0.180 | 0.439 | 0.006 | 0.775 | 0.1746 | 0.0019 | 2490   | 16  | 2347 | 27  | 2606   | 17  |
| 14AP24                           | Zircon_Sample-194.FIN2 | 610  | 160 | 340 | 130 | 266  | 76  | 1.9  | 10.720 | 0.780 | 0.442 | 0.032 | 0.991 | 0.1758 | 0.0014 | 2492   | 68  | 2360 | 140 | 2613   | 14  |
| 14AP24                           | Zircon_Sample-098.FIN2 | 286  | 34  | 383 | 61  | 359  | 41  | 1.3  | 10.330 | 0.220 | 0.456 | 0.011 | 0.922 | 0.1640 | 0.0011 | 2464   | 19  | 2419 | 47  | 2498   | 11  |
| 14AP24                           | Zircon_Sample-066.FIN2 | 1209 | 59  | 429 | 61  | 429  | 57  | 3.0  | 10.510 | 0.380 | 0.458 | 0.012 | 0.926 | 0.1663 | 0.0023 | 2480   | 34  | 2432 | 54  | 2520   | 23  |
| 14AP24                           | Zircon_Sample-010.FIN2 | 97   | 6   | 134 | 15  | 141  | 11  | 0.8  | 12.080 | 0.340 | 0.475 | 0.012 | 0.947 | 0.1827 | 0.0011 | 2609   | 27  | 2504 | 54  | 2677.9 | 9.5 |
| 14AP24                           | Zircon_Sample-008.FIN2 | 175  | 25  | 158 | 17  | 173  | 16  | 1.2  | 12.100 | 0.540 | 0.483 | 0.016 | 0.966 | 0.1826 | 0.0021 | 2623   | 37  | 2538 | 70  | 2676   | 19  |
| 14AP24                           | Zircon_Sample-053.FIN2 | 616  | 20  | 119 | 9   | 142  | 9   | 5.5  | 12.200 | 0.170 | 0.484 | 0.007 | 0.949 | 0.1817 | 0.0007 | 2619   | 13  | 2543 | 28  | 2668.1 | 6.4 |
| 14AP24                           | Zircon_Sample-079.FIN2 | 516  | 54  | 45  | 20  | 40   | 16  | 18.0 | 13.420 | 0.340 | 0.498 | 0.011 | 0.944 | 0.1945 | 0.0016 | 2709   | 24  | 2604 | 47  | 2781   | 13  |
| 14AP24                           | Zircon_Sample-114.FIN2 | 818  | 56  | 890 | 200 | 1050 | 220 | 1.0  | 12.580 | 0.170 | 0.500 | 0.005 | 0.881 | 0.1823 | 0.0013 | 2648   | 12  | 2612 | 20  | 2673   | 12  |
| 14AP24                           | Zircon_Sample-102.FIN2 | 273  | 25  | 574 | 84  | 488  | 77  | 1.1  | 12.540 | 0.240 | 0.498 | 0.005 | 0.862 | 0.1825 | 0.0013 | 2645   | 18  | 2614 | 31  | 2676   | 12  |
| 14AP24                           | Zircon_Sample-180.FIN2 | 158  | 10  | 86  | 4   | 102  | 7   | 2.2  | 12.600 | 0.260 | 0.504 | 0.011 | 0.904 | 0.1787 | 0.0019 | 2650   | 19  | 2632 | 49  | 2641   | 18  |
| 14AP24                           | Zircon_Sample-131.FIN2 | 428  | 66  | 382 | 75  | 498  | 64  | 1.0  | 13.180 | 0.360 | 0.508 | 0.013 | 0.955 | 0.1864 | 0.0010 | 2691   | 25  | 2649 | 56  | 2710.3 | 9.2 |
| 14AP24                           | Zircon_Sample-022.FIN2 | 224  | 78  | 41  | 14  | 48   | 14  | 6.1  | 12.960 | 0.540 | 0.510 | 0.022 | 0.955 | 0.1846 | 0.0017 | 2674   | 41  | 2655 | 97  | 2694   | 16  |
| 14AP24                           | Zircon_Sample-101.FIN2 | 307  | 16  | 424 | 49  | 381  | 42  | 1.7  | 13.860 | 0.150 | 0.514 | 0.005 | 0.844 | 0.1955 | 0.0018 | 2744   | 13  | 2672 | 23  | 2789   | 15  |
| 14AP24                           | Zircon_Sample-170.FIN2 | 299  | 27  | 185 | 34  | 190  | 30  | 2.1  | 13.760 | 0.550 | 0.519 | 0.017 | 0.938 | 0.1894 | 0.0025 | 2730   | 37  | 2691 | 70  | 2737   | 21  |
| 14AP24                           | Zircon_Sample-021.FIN2 | 75   | 53  | 7   | 4   | 6    | 4   | 10.0 | 10.370 | 0.820 | 0.538 | 0.039 | 0.950 | 0.1394 | 0.0042 | 2462   | 73  | 2770 | 160 | 2235   | 44  |
| 14AP24                           | Zircon_Sample-192.FIN2 | 165  | 12  | 194 | 21  | 238  | 25  | 0.8  | 13.600 | 0.420 | 0.539 | 0.014 | 0.973 | 0.1835 | 0.0014 | 2720   | 30  | 2780 | 59  | 2684   | 12  |
| 14AP24                           | Zircon_Sample-169.FIN2 | 590  | 130 | 380 | 150 | 420  | 150 | 2.6  | 14.58  | 0.42  | 0.541 | 0.014 | 0.825 | 0.1965 | 0.002  | 2787   | 27  | 2786 | 59  | 2797   | 15  |
| 14AP24                           | Zircon_Sample-065.FIN2 | 640  | 110 | 275 | 39  | 372  | 48  | 2.8  | 21.510 | 0.840 | 0.609 | 0.020 | 0.965 | 0.2558 | 0.0028 | 3168   | 41  | 3084 | 87  | 3221   | 18  |
| Common-Pb corrected <sup>d</sup> |                        |      |     |     |     |      |     |      |        |       |       |       |       |        |        |        |     |      |     |        |     |
| 14AP24                           | Zircon_Sample-087.FIN2 | 320  | 52  | 115 | 21  | 169  | 24  | 2.2  | 5.300  | 0.130 | 0.317 | 0.006 | 0.716 | 0.1202 | 0.0019 | 1868   | 20  | 1775 | 31  | 1966   | 31  |
| 14AP24                           | Zircon_Sample-207.FIN2 | 1120 | 160 | 467 | 45  | 259  | 29  | 1.7  | 2.680  | 0.150 | 0.220 | 0.004 | 0.763 | 0.0873 | 0.0036 | 1321   | 41  | 1280 | 22  | 1360   | 82  |

<sup>a</sup>U, Th and Pb concentrations with errors (2SE) and U/Th ratios are calculated relative to the Harvard 91500 reference zircon

<sup>b</sup>Corrected for background, downhole and within-run Pb/U fractionation. Normalised to the reference zircon Harvard 91500 (TIMS/measured values). The <sup>207</sup>Pb/<sup>235</sup>U is calculated through: (<sup>207</sup>Pb/<sup>206</sup>Pb)/(<sup>238</sup>U/<sup>206</sup>Pb \* 1/137.88)

<sup>c</sup>Rho is the error correlation defined as the quotient of the propagated errors of the <sup>206</sup>Pb/<sup>238</sup>U and <sup>207</sup>Pb/<sup>235</sup>U ratios

<sup>d</sup>Quadratic addition of within-run errors (2 SE) and the all-session reproducibility of Harvard 91500, GJ-1 and Plesovice zircon reference materials (2 SE)

<sup>e</sup>Normalised to the Harvard 91500 reference zircon

<sup>f</sup>Common Pb correction through measured Pb<sup>204</sup> (corrected for Hg<sup>204</sup> using natural abundance Hg isotopic ratios) and the model Pb composition of Stacey & Kramers (1975))

14AP43

|        |                        | CONCENTRATIONS <sup>a</sup> |            |          |            |          |            | RATIOS            |                               |                         |                                                  |                         |                     | AGES                                              |                         |                                                  |                         |                                                  |                         |                                                   |                         |
|--------|------------------------|-----------------------------|------------|----------|------------|----------|------------|-------------------|-------------------------------|-------------------------|--------------------------------------------------|-------------------------|---------------------|---------------------------------------------------|-------------------------|--------------------------------------------------|-------------------------|--------------------------------------------------|-------------------------|---------------------------------------------------|-------------------------|
| Sample | Analysis               | U [ppm]                     | 2 $\sigma$ | Th [ppm] | 2 $\sigma$ | Pb [ppm] | 2 $\sigma$ | U/Th <sup>a</sup> | <sup>235</sup> U <sup>b</sup> | 2 $\sigma$ <sup>d</sup> | <sup>206</sup> Pb/ <sup>238</sup> U <sup>b</sup> | 2 $\sigma$ <sup>d</sup> | $\rho$ <sup>c</sup> | <sup>207</sup> Pb/ <sup>206</sup> Pb <sup>e</sup> | 2 $\sigma$ <sup>d</sup> | <sup>207</sup> Pb/ <sup>235</sup> U <sup>b</sup> | 2 $\sigma$ <sup>d</sup> | <sup>206</sup> Pb/ <sup>238</sup> U <sup>b</sup> | 2 $\sigma$ <sup>d</sup> | <sup>207</sup> Pb/ <sup>206</sup> Pb <sup>e</sup> | 2 $\sigma$ <sup>d</sup> |
| 14AP43 | Zircon_Sample-194.FIN2 | 433                         | 42         | 151      | 14         | 8        | 0          | 2.9               | 0.126                         | 0.005                   | 0.018                                            | 0.000                   | 0.560               | 0.0529                                            | 0.0021                  | 120                                              | 4.5                     | 112.7                                            | 1.4                     | 314                                               | 89                      |
| 14AP43 | Zircon_Sample-193.FIN2 | 332                         | 29         | 373      | 44         | 21       | 2          | 0.9               | 0.133                         | 0.005                   | 0.020                                            | 0.000                   | 0.253               | 0.0486                                            | 0.0020                  | 126.8                                            | 4.7                     | 127.6                                            | 2.2                     | 128                                               | 89                      |
| 14AP43 | Zircon_Sample-130.FIN2 | 522                         | 54         | 242      | 24         | 13       | 1          | 2.2               | 0.142                         | 0.006                   | 0.020                                            | 0.000                   | 0.372               | 0.0508                                            | 0.0019                  | 135.1                                            | 5                       | 129.9                                            | 1.9                     | 227                                               | 86                      |
| 14AP43 | Zircon_Sample-101.FIN2 | 1120                        | 100        | 340      | 100        | 25       | 5          | 3.7               | 0.166                         | 0.004                   | 0.022                                            | 0.000                   | 0.443               | 0.0546                                            | 0.0014                  | 155.8                                            | 3.8                     | 141.9                                            | 1.6                     | 393                                               | 58                      |
| 14AP43 | Zircon_Sample-206.FIN2 | 535                         | 26         | 246      | 14         | 18       | 1          | 2.2               | 0.159                         | 0.004                   | 0.023                                            | 0.000                   | 0.451               | 0.0497                                            | 0.0013                  | 149.9                                            | 3.8                     | 148.4                                            | 2.5                     | 178                                               | 61                      |
| 14AP43 | Zircon_Sample-126.FIN2 | 384                         | 28         | 134      | 19         | 9        | 1          | 3.0               | 0.174                         | 0.008                   | 0.023                                            | 0.000                   | 0.126               | 0.0545                                            | 0.0019                  | 163                                              | 6.6                     | 148.6                                            | 1.4                     | 387                                               | 78                      |
| 14AP43 | Zircon_sample-010.FIN2 | 577                         | 44         | 155      | 14         | 12       | 1          | 3.8               | 0.162                         | 0.011                   | 0.023                                            | 0.000                   | 0.399               | 0.0513                                            | 0.0033                  | 152.3                                            | 9.5                     | 148.7                                            | 1.2                     | 240                                               | 140                     |
| 14AP43 | Zircon_Sample-099.FIN2 | 264                         | 6          | 77       | 2          | 6        | 0          | 3.4               | 0.188                         | 0.013                   | 0.024                                            | 0.000                   | 0.334               | 0.0572                                            | 0.0040                  | 174                                              | 11                      | 149.9                                            | 2.3                     | 480                                               | 160                     |
| 14AP43 | Zircon_Sample-052.FIN2 | 216                         | 8          | 256      | 12         | 17       | 2          | 0.8               | 0.165                         | 0.009                   | 0.024                                            | 0.000                   | 0.143               | 0.0484                                            | 0.0026                  | 154.7                                            | 8.2                     | 153.6                                            | 2.9                     | 160                                               | 140                     |
| 14AP43 | Zircon_sample-021.FIN2 | 424                         | 60         | 55       | 10         | 5        | 1          | 7.8               | 0.191                         | 0.008                   | 0.027                                            | 0.000                   | 0.780               | 0.0508                                            | 0.0016                  | 177.2                                            | 6.4                     | 174                                              | 1.6                     | 231                                               | 74                      |
| 14AP43 | Zircon_Sample-141.FIN2 | 145                         | 2          | 92       | 4          | 10       | 1          | 1.6               | 0.225                         | 0.020                   | 0.032                                            | 0.000                   | 0.140               | 0.0492                                            | 0.0026                  | 205                                              | 16                      | 201.8                                            | 2.1                     | 160                                               | 120                     |
| 14AP43 | Zircon_Sample-077.FIN2 | 366                         | 21         | 884      | 54         | 88       | 5          | 0.4               | 0.308                         | 0.037                   | 0.036                                            | 0.000                   | 0.450               | 0.0605                                            | 0.0071                  | 272                                              | 29                      | 230.6                                            | 2                       | 580                                               | 260                     |
| 14AP43 | Zircon_sample-007.FIN2 | 149                         | 12         | 235      | 29         | 27       | 3          | 0.7               | 0.285                         | 0.017                   | 0.040                                            | 0.001                   | 0.641               | 0.0524                                            | 0.0027                  | 255                                              | 13                      | 253.5                                            | 4.1                     | 290                                               | 120                     |
| 14AP43 | Zircon_Sample-128.FIN2 | 315                         | 39         | 617      | 81         | 67       | 9          | 0.5               | 0.308                         | 0.012                   | 0.040                                            | 0.000                   | 0.221               | 0.0546                                            | 0.0018                  | 272.7                                            | 8.9                     | 254.8                                            | 3                       | 387                                               | 72                      |
| 14AP43 | Zircon_sample-036.FIN2 | 154                         | 9          | 267      | 15         | 31       | 2          | 0.6               | 0.286                         | 0.015                   | 0.041                                            | 0.000                   | 0.077               | 0.0510                                            | 0.0025                  | 255                                              | 12                      | 256.5                                            | 2.4                     | 230                                               | 110                     |
| 14AP43 | Zircon_Sample-165.FIN2 | 70                          | 5          | 56       | 3          | 6        | 0          | 1.2               | 0.296                         | 0.012                   | 0.041                                            | 0.001                   | 0.177               | 0.0541                                            | 0.0027                  | 262.8                                            | 9.2                     | 260.1                                            | 3.9                     | 360                                               | 110                     |
| 14AP43 | Zircon_sample-025.FIN2 | 451                         | 46         | 573      | 89         | 66       | 10         | 0.8               | 0.374                         | 0.018                   | 0.043                                            | 0.000                   | 0.581               | 0.0636                                            | 0.0030                  | 322                                              | 13                      | 269.9                                            | 2.6                     | 730                                               | 100                     |
| 14AP43 | Zircon_Sample-089.FIN2 | 248                         | 29         | 290      | 24         | 39       | 4          | 0.8               | 0.404                         | 0.028                   | 0.043                                            | 0.001                   | 0.810               | 0.0688                                            | 0.0043                  | 344                                              | 20                      | 271.8                                            | 3.4                     | 880                                               | 120                     |
| 14AP43 | Zircon_sample-008.FIN2 | 546                         | 22         | 632      | 48         | 81       | 7          | 0.9               | 0.317                         | 0.007                   | 0.044                                            | 0.000                   | 0.404               | 0.0537                                            | 0.0012                  | 279.4                                            | 5.4                     | 277.8                                            | 1.8                     | 356                                               | 49                      |
| 14AP43 | Zircon_Sample-053.FIN2 | 643                         | 83         | 324      | 38         | 42       | 4          | 2.0               | 0.325                         | 0.008                   | 0.044                                            | 0.001                   | 0.884               | 0.0528                                            | 0.0011                  | 286                                              | 6                       | 279.9                                            | 4                       | 318                                               | 46                      |
| 14AP43 | Zircon_Sample-078.FIN2 | 324                         | 30         | 103      | 4          | 13       | 1          | 3.0               | 0.331                         | 0.013                   | 0.045                                            | 0.000                   | 0.156               | 0.0531                                            | 0.0019                  | 290.3                                            | 9.9                     | 282.6                                            | 1.8                     | 326                                               | 80                      |
| 14AP43 | Zircon_Sample-164.FIN2 | 319                         | 28         | 200      | 14         | 23       | 2          | 1.6               | 0.335                         | 0.020                   | 0.047                                            | 0.001                   | 0.028               | 0.0525                                            | 0.0031                  | 293                                              | 15                      | 296.4                                            | 3.5                     | 300                                               | 130                     |
| 14AP43 | Zircon_Sample-203.FIN2 | 296                         | 7          | 198      | 20         | 28       | 3          | 1.6               | 0.362                         | 0.015                   | 0.048                                            | 0.000                   | 0.011               | 0.0555                                            | 0.0024                  | 313                                              | 11                      | 300.6                                            | 1.9                     | 425                                               | 92                      |
| 14AP43 | Zircon_Sample-051.FIN2 | 198                         | 12         | 218      | 26         | 29       | 3          | 0.9               | 0.358                         | 0.016                   | 0.048                                            | 0.000                   | 0.352               | 0.0541                                            | 0.0021                  | 311                                              | 12                      | 302.2                                            | 1.6                     | 369                                               | 88                      |
| 14AP43 | Zircon_sample-046.FIN2 | 250                         | 21         | 167      | 14         | 22       | 2          | 1.5               | 0.362                         | 0.013                   | 0.048                                            | 0.001                   | 0.096               | 0.0547                                            | 0.0020                  | 313.2                                            | 9.7                     | 303                                              | 3.6                     | 388                                               | 85                      |
| 14AP43 | Zircon_Sample-191.FIN2 | 204                         | 17         | 200      | 16         | 27       | 2          | 1.0               | 0.345                         | 0.013                   | 0.048                                            | 0.001                   | 0.361               | 0.0521                                            | 0.0019                  | 301                                              | 10                      | 303.4                                            | 4.1                     | 285                                               | 84                      |
| 14AP43 | Zircon_Sample-178.FIN2 | 583                         | 28         | 187      | 25         | 28       | 3          | 3.2               | 0.363                         | 0.008                   | 0.050                                            | 0.001                   | 0.449               | 0.0531                                            | 0.0013                  | 314.5                                            | 6.2                     | 315                                              | 3.9                     | 328                                               | 56                      |
| 14AP43 | Zircon_Sample-075.FIN2 | 511                         | 55         | 297      | 34         | 41       | 4          | 1.7               | 0.392                         | 0.025                   | 0.051                                            | 0.001                   | 0.431               | 0.0555                                            | 0.0033                  | 335                                              | 18                      | 318.8                                            | 5.7                     | 420                                               | 130                     |
| 14AP43 | Zircon_sample-035.FIN2 | 214                         | 17         | 137      | 15         | 20       | 2          | 1.6               | 0.371                         | 0.013                   | 0.051                                            | 0.001                   | 0.057               | 0.0539                                            | 0.0023                  | 320.3                                            | 9.4                     | 320                                              | 4                       | 355                                               | 95                      |
| 14AP43 | Zircon_Sample-204.FIN2 | 456                         | 26         | 496      | 39         | 74       | 5          | 0.9               | 0.385                         | 0.007                   | 0.053                                            | 0.000                   | 0.424               | 0.0535                                            | 0.0009                  | 330.7                                            | 5.3                     | 331.4                                            | 2.6                     | 349                                               | 40                      |
| 14AP43 | Zircon_Sample-181.FIN2 | 557                         | 39         | 463      | 54         | 66       | 7          | 1.3               | 0.413                         | 0.015                   | 0.053                                            | 0.001                   | 0.029               | 0.0567                                            | 0.0022                  | 351                                              | 11                      | 331.5                                            | 3.9                     | 473                                               | 86                      |
| 14AP43 | Zircon_Sample-072.FIN2 | 179                         | 28         | 203      | 47         | 31       | 7          | 0.9               | 0.462                         | 0.019                   | 0.057                                            | 0.001                   | 0.697               | 0.0575                                            | 0.0019                  | 392                                              | 18                      | 360                                              | 5.5                     | 509                                               | 74                      |
| 14AP43 | Zircon_Sample-064.FIN2 | 177                         | 22         | 296      | 68         | 47       | 10         | 0.6               | 0.450                         | 0.020                   | 0.059                                            | 0.001                   | 0.370               | 0.0543                                            | 0.0027                  | 377                                              | 14                      | 369.4                                            | 4.4                     | 380                                               | 110                     |
| 14AP43 | Zircon_Sample-073.FIN2 | 198                         | 13         | 192      | 20         | 33       | 3          | 1.0               | 0.470                         | 0.008                   | 0.062                                            | 0.001                   | 0.471               | 0.0543                                            | 0.0010                  | 391.4                                            | 5.2                     | 385.1                                            | 6.2                     | 380                                               | 43                      |
| 14AP43 | Zircon_Sample-124.FIN2 | 329                         | 15         | 129      | 13         | 25       | 2          | 2.5               | 0.534                         | 0.019                   | 0.067                                            | 0.001                   | 0.624               | 0.0570                                            | 0.0016                  | 434                                              | 12                      | 417.1                                            | 3.7                     | 490                                               | 60                      |
| 14AP43 | Zircon_Sample-151.FIN2 | 355                         | 15         | 581      | 24         | 105      | 4          | 0.6               | 0.526                         | 0.010                   | 0.068                                            | 0.001                   | 0.423               | 0.0562                                            | 0.0012                  | 429.1                                            | 6.3                     | 424.5                                            | 6.4                     | 457                                               | 47                      |
| 14AP43 | Zircon_Sample-059.FIN2 | 446                         | 26         | 177      | 6          | 36       | 1          | 2.5               | 0.556                         | 0.011                   | 0.072                                            | 0.001                   | 0.516               | 0.0549                                            | 0.0011                  | 448.7                                            | 7.4                     | 449.1                                            | 3.7                     | 408                                               | 46                      |
| 14AP43 | Zircon_Sample-153.FIN2 | 530                         | 54         | 129      | 19         | 26       | 3          | 4.2               | 0.572                         | 0.012                   | 0.073                                            | 0.001                   | 0.758               | 0.0574                                            | 0.0009                  | 459.4                                            | 8                       | 452.8                                            | 8.3                     | 507                                               | 34                      |
| 14AP43 | Zircon_sample-037.FIN2 | 388                         | 65         | 298      | 82         | 62       | 15         | 1.5               | 0.582                         | 0.015                   | 0.074                                            | 0.001                   | 0.661               | 0.0571                                            | 0.0012                  | 465.6                                            | 9.6                     | 462.8                                            | 4.6                     | 494                                               | 49                      |
| 14AP43 | Zircon_Sample-207.FIN2 | 187                         | 4          | 99       | 13         | 21       | 1          | 1.9               | 0.613                         | 0.036                   | 0.076                                            | 0.001                   | 0.262               | 0.0581                                            | 0.0034                  | 485                                              | 23                      | 472.4                                            | 3.1                     | 530                                               | 120                     |
| 14AP43 | Zircon_Sample-156.FIN2 | 311                         | 17         | 316      | 26         | 60       | 6          | 1.0               | 0.663                         | 0.023                   | 0.078                                            | 0.001                   | 0.693               | 0.0618                                            | 0.0020                  | 516                                              | 14                      | 484.7                                            | 5                       | 664                                               | 70                      |
| 14AP43 | Zircon_Sample-142.FIN2 | 200                         | 11         | 113      | 8          | 25       | 2          | 1.8               | 0.617                         | 0.024                   | 0.080                                            | 0.001                   | 0.286               | 0.0561                                            | 0.0017                  | 488                                              | 15                      | 498.6                                            | 8                       | 453                                               | 66                      |
| 14AP43 | Zircon_Sample-167.FIN2 | 252                         | 20         | 99       | 22         | 22       | 4          | 2.7               | 0.658                         | 0.020                   | 0.083                                            | 0.001                   | 0.179               | 0.0583                                            | 0.0020                  | 513                                              | 12                      | 511.2                                            | 7.2                     | 537                                               | 78                      |
| 14AP43 | Zircon_Sample-169.FIN2 | 194                         | 7          | 102      | 4          | 22       | 1          | 1.9               | 0.670                         | 0.021                   | 0.084                                            | 0.001                   | 0.059               | 0.0585                                            | 0.0021                  | 521                                              | 13                      | 520.1                                            | 6.8                     | 543                                               | 80                      |
| 14AP43 | Zircon_Sample-138.FIN2 | 84                          | 3          | 89       | 4          | 20       | 1          | 1.0               | 0.692                         | 0.022                   | 0.084                                            | 0.001                   | 0.156               | 0.0598                                            | 0.0028                  | 534                                              | 13                      | 520.6                                            | 7.9                     | 612                                               | 91                      |
| 14AP43 | Zircon_Sample-144.FIN2 | 277                         | 43         | 188      | 45         | 44       | 8          | 1.6               | 0.712                         | 0.028                   | 0.085                                            | 0.002                   | 0.247               | 0.0609                                            | 0.0016                  | 545                                              | 17                      | 528.4                                            | 9.8                     | 632                                               | 55                      |
| 14AP43 | Zircon_sample-014.FIN2 | 195                         | 6          | 138      | 6          | 36       | 1          | 1.4               | 0.673                         | 0.020                   | 0.085                                            | 0.001                   | 0.348               | 0.0573                                            | 0.0018                  | 522                                              | 12                      | 528.8                                            | 4.1                     | 500                                               | 68                      |
| 14AP43 | Zircon_Sample-205.FIN2 | 191                         | 21         | 39       | 5          | 10       | 1          | 4.9               | 0.730                         | 0.028                   | 0.089                                            | 0.002                   | 0.596               | 0.0597                                            | 0.0016                  | 556                                              | 17                      | 549.6                                            | 9.6                     | 592                                               | 57                      |
| 14AP43 | Zircon_Sample-117.FIN2 | 254                         | 33         | 117      | 6          | 35       | 2          | 2.1               | 0.929                         | 0.017                   | 0.107                                            | 0.001                   | 0.330               | 0.0613                                            | 0.0012                  | 667.2                                            | 8.8                     | 657.1                                            | 4.7                     | 649                                               | 41                      |
| 14AP43 | Zircon_Sample-102.FIN2 | 55                          | 2          | 32       | 2          | 11       | 1          | 1.7               | 1.236                         | 0.043                   | 0.135                                            | 0.002                   | 0.306               | 0.0663                                            | 0.0022                  | 822                                              | 17                      | 814.8                                            | 9                       | 809                                               | 69                      |
| 14AP43 | Zircon_Sample-103.FIN2 | 199                         | 6          | 208      | 9          | 82       | 3          | 0.9               | 1.279                         | 0.031                   | 0.139                                            | 0.003                   | 0.660               | 0.0662                                            | 0.0013                  | 836                                              | 14                      | 841                                              | 15                      | 813                                               | 43                      |
| 14AP43 | Zircon_Sample-189.FIN2 | 96                          | 15         | 66       | 10         | 25       | 3          | 1.4               | 1.314                         | 0.057                   | 0.139                                            | 0.004                   | 0.309               | 0.0686                                            | 0.0026                  | 851                                              | 25                      | 841                                              | 20                      | 882                                               | 77                      |
| 14AP43 | Zircon_Sample-195.FIN2 | 242                         | 14         | 289      | 24         | 114      | 7          | 0.8               | 1.361                         | 0.030                   | 0.148                                            | 0.001                   | 0.760               | 0.0685                                            | 0.0009                  | 872                                              | 13                      | 887.7                                            | 7.9                     | 883                                               | 27                      |
| 14AP43 | Zircon_Sample-131.FIN2 | 1533                        | 60         | 96       | 7          | 82       | 37         | 16.1              | 3.560                         | 0.250                   | 0.231                                            | 0.019                   | 0.567               | 0.1114                                            | 0.0053                  | 1548                                             | 60                      | 1330                                             | 100                     | 1813                                              | 77                      |
| 14AP43 | Zircon_Sample-168.FIN2 | 501                         | 33         | 82       | 4          | 63       | 2          | 5.8               | 3.790                         | 0.130                   | 0.253                                            | 0.007                   | 0.952               | 0.1101                                            | 0.0013                  | 1589                                             | 28                      | 1456                                             | 38                      | 1806                                              | 20                      |
| 14AP43 | Zircon_Sample-139.FIN2 | 316                         | 15         | 297      | 24         | 194      | 19         | 1.0               | 4.030                         | 0.100                   | 0.262                                            | 0.006                   | 0.947               | 0.1122                                            | 0.0011                  | 1638                                             | 21                      | 1497                                             | 28                      | 1836                                              | 17                      |
| 14AP43 | Zircon_Sample-190.FIN2 | 583                         | 21         | 120      | 38         | 84       | 26         | 5.8               | 3.853                         | 0.082                   | 0.262                                            | 0.004                   | 0.722               | 0.1080                                            | 0.0018                  | 1604                                             | 17                      | 1501                                             | 21                      | 1765                                              | 30                      |
| 14AP43 | Zircon_Sample-060.FIN2 | 284                         | 28         | 83       | 4          | 61       | 2          | 3.4               | 4.150                         | 0.210                   | 0.273                                            | 0.014                   | 0.980               | 0.1083                                            | 0.0011                  | 1660                                             | 42                      | 1557                                             | 69                      | 1770                                              | 18                      |
| 14AP43 | Zircon_Sample-152.FIN2 | 122                         | 6          | 113      | 6          | 80       | 5          | 1.0               | 4.071                         | 0.072                   | 0.295                                            | 0.005                   | 0.722               | 0.1012                                            | 0.001                   |                                                  |                         |                                                  |                         |                                                   |                         |

|                                  |                        |      |     |      |     |     |    |     |        |       |       |       |       |        |        |       |     |      |     |        |     |
|----------------------------------|------------------------|------|-----|------|-----|-----|----|-----|--------|-------|-------|-------|-------|--------|--------|-------|-----|------|-----|--------|-----|
| 14AP43                           | Zircon_Sample-087.FIN2 | 166  | 44  | 125  | 38  | 122 | 29 | 1.3 | 7.260  | 0.780 | 0.351 | 0.033 | 0.993 | 0.1518 | 0.0031 | 2130  | 110 | 1930 | 160 | 2365   | 35  |
| 14AP43                           | Zircon_Sample-076.FIN2 | 458  | 46  | 128  | 10  | 103 | 12 | 3.7 | 5.750  | 0.670 | 0.352 | 0.026 | 0.994 | 0.1221 | 0.0019 | 1970  | 80  | 1940 | 130 | 1986   | 27  |
| 14AP43                           | Zircon_sample-038.FIN2 | 1110 | 260 | 500  | 150 | 332 | 58 | 2.3 | 5.930  | 0.460 | 0.354 | 0.023 | 0.992 | 0.1212 | 0.0014 | 1956  | 68  | 1950 | 110 | 1981   | 25  |
| 14AP43                           | Zircon_Sample-180.FIN2 | 185  | 17  | 255  | 18  | 220 | 13 | 0.7 | 5.719  | 0.067 | 0.354 | 0.004 | 0.731 | 0.1169 | 0.0012 | 1934  | 10  | 1955 | 17  | 1908   | 19  |
| 14AP43                           | Zircon_sample-039.FIN2 | 264  | 8   | 346  | 11  | 302 | 12 | 0.8 | 6.370  | 0.049 | 0.357 | 0.003 | 0.681 | 0.1296 | 0.0009 | 2028  | 6.7 | 1968 | 16  | 2092   | 13  |
| 14AP43                           | Zircon_Sample-177.FIN2 | 129  | 31  | 78   | 17  | 64  | 13 | 1.6 | 5.900  | 0.290 | 0.363 | 0.010 | 0.856 | 0.1192 | 0.0030 | 1957  | 43  | 1995 | 48  | 1940   | 46  |
| 14AP43                           | Zircon_Sample-113.FIN2 | 250  | 16  | 86   | 4   | 79  | 4  | 2.9 | 6.280  | 0.110 | 0.363 | 0.004 | 0.891 | 0.1241 | 0.0012 | 2016  | 15  | 1996 | 19  | 2015   | 17  |
| 14AP43                           | Zircon_Sample-179.FIN2 | 322  | 10  | 182  | 19  | 152 | 13 | 1.8 | 7.960  | 0.480 | 0.366 | 0.018 | 0.982 | 0.1589 | 0.0024 | 2237  | 50  | 2008 | 85  | 2443   | 26  |
| 14AP43                           | Zircon_sample-040.FIN2 | 169  | 6   | 169  | 5   | 158 | 5  | 1.0 | 6.470  | 0.150 | 0.372 | 0.006 | 0.939 | 0.1282 | 0.0010 | 2041  | 20  | 2039 | 29  | 2073   | 14  |
| 14AP43                           | Zircon_Sample-088.FIN2 | 370  | 40  | 66   | 6   | 68  | 7  | 5.5 | 9.890  | 0.990 | 0.375 | 0.032 | 0.993 | 0.1944 | 0.0036 | 2417  | 97  | 2050 | 150 | 2779   | 31  |
| 14AP43                           | Zircon_Sample-166.FIN2 | 179  | 11  | 130  | 12  | 122 | 9  | 1.4 | 7.060  | 0.110 | 0.390 | 0.006 | 0.619 | 0.1326 | 0.0011 | 2119  | 13  | 2132 | 29  | 2132   | 15  |
| 14AP43                           | Zircon_Sample-048.FIN2 | 322  | 30  | 119  | 8   | 145 | 6  | 2.6 | 13.060 | 0.490 | 0.401 | 0.013 | 0.946 | 0.2363 | 0.0030 | 2681  | 36  | 2191 | 52  | 3094   | 20  |
| 14AP43                           | Zircon_Sample-170.FIN2 | 98   | 4   | 57   | 3   | 58  | 4  | 1.7 | 9.630  | 0.190 | 0.433 | 0.007 | 0.683 | 0.1629 | 0.0023 | 2399  | 19  | 2318 | 31  | 2485   | 24  |
| 14AP43                           | Zircon_Sample-150.FIN2 | 295  | 25  | 107  | 12  | 121 | 14 | 2.7 | 13.250 | 0.580 | 0.475 | 0.016 | 0.943 | 0.2040 | 0.0035 | 2696  | 41  | 2507 | 71  | 2858   | 28  |
| 14AP43                           | Zircon_Sample-098.FIN2 | 164  | 20  | 135  | 19  | 151 | 20 | 1.2 | 12.780 | 0.190 | 0.493 | 0.007 | 0.845 | 0.1885 | 0.0016 | 2663  | 14  | 2582 | 31  | 2729   | 14  |
| 14AP43                           | Zircon_sample-011.FIN2 | 74   | 16  | 75   | 17  | 92  | 19 | 1.0 | 12.210 | 0.490 | 0.498 | 0.019 | 0.937 | 0.1802 | 0.0018 | 2619  | 38  | 2602 | 81  | 2655   | 17  |
| 14AP43                           | Zircon_Sample-196.FIN2 | 89   | 6   | 61   | 4   | 75  | 3  | 1.5 | 12.580 | 0.290 | 0.503 | 0.008 | 0.909 | 0.1828 | 0.0019 | 2647  | 22  | 2626 | 33  | 2678   | 17  |
| 14AP43                           | Zircon_sample-034.FIN2 | 68   | 6   | 28   | 2   | 35  | 2  | 2.4 | 11.750 | 0.160 | 0.504 | 0.004 | 0.775 | 0.1711 | 0.0019 | 2584  | 13  | 2631 | 18  | 2568   | 19  |
| 14AP43                           | Zircon_Sample-118.FIN2 | 364  | 76  | 64   | 12  | 73  | 15 | 5.8 | 12.730 | 0.250 | 0.505 | 0.008 | 0.691 | 0.1800 | 0.0028 | 2659  | 18  | 2636 | 34  | 2652   | 26  |
| 14AP43                           | Zircon_sample-009.FIN2 | 156  | 19  | 96   | 21  | 115 | 26 | 1.7 | 15.200 | 0.200 | 0.507 | 0.007 | 0.929 | 0.2215 | 0.0010 | 2828  | 12  | 2642 | 28  | 2991.6 | 7.5 |
| 14AP43                           | Zircon_Sample-085.FIN2 | 125  | 11  | 143  | 14  | 174 | 15 | 0.9 | 12.800 | 0.190 | 0.509 | 0.005 | 0.851 | 0.1852 | 0.0014 | 2665  | 14  | 2651 | 22  | 2700   | 13  |
| 14AP43                           | Zircon_Sample-176.FIN2 | 271  | 29  | 189  | 31  | 229 | 29 | 1.5 | 13.130 | 0.410 | 0.521 | 0.013 | 0.962 | 0.1861 | 0.0015 | 2694  | 28  | 2703 | 55  | 2708   | 13  |
| 14AP43                           | Zircon_Sample-092.FIN2 | 116  | 5   | 69   | 7   | 83  | 6  | 1.7 | 13.180 | 0.360 | 0.528 | 0.010 | 0.931 | 0.1861 | 0.0016 | 2691  | 26  | 2731 | 43  | 2707   | 14  |
| Common-Pb corrected <sup>d</sup> |                        |      |     |      |     |     |    |     |        |       |       |       |       |        |        |       |     |      |     |        |     |
| 14AP43                           | Zircon_sample-013.FIN2 | 1840 | 220 | 1330 | 130 | 391 | 41 | 1.4 | 0.946  | 0.011 | 0.109 | 0.002 | 0.837 | 0.0639 | 0.0007 | 675.9 | 6   | 669  | 11  | 737    | 23  |
| 14AP43                           | Zircon_sample-026.FIN2 | 889  | 35  | 548  | 22  | 413 | 8  | 1.7 | 3.560  | 0.140 | 0.246 | 0.008 | 0.895 | 0.1063 | 0.0013 | 1539  | 31  | 1417 | 43  | 1736   | 23  |
| 14AP43                           | Zircon_Sample-125.FIN2 | 219  | 34  | 117  | 16  | 140 | 17 | 1.9 | 7.750  | 0.830 | 0.328 | 0.035 | 0.985 | 0.1761 | 0.0034 | 2230  | 110 | 1820 | 170 | 2616   | 33  |
| 14AP43                           | Zircon_Sample-209.FIN2 | 234  | 38  | 107  | 26  | 114 | 15 | 2.4 | 8.710  | 0.530 | 0.378 | 0.024 | 0.989 | 0.1665 | 0.0024 | 2305  | 58  | 2070 | 110 | 2523   | 25  |

<sup>a</sup>U, Th and Pb concentrations with errors (2SE) and U/Th ratios are calculated relative to the Harvard 91500 reference zircon

<sup>b</sup>Corrected for background, downhole and within-run Pb/U fractionation. Normalised to the reference zircon Harvard 91500 (TIMS/measured values). The <sup>207</sup>Pb/<sup>235</sup>U is calculated through: (<sup>207</sup>Pb/<sup>206</sup>Pb)/(<sup>238</sup>U/<sup>206</sup>Pb \* 1/137.88)

<sup>c</sup>Rho is the error correlation defined as the quotient of the propagated errors of the <sup>206</sup>Pb/<sup>238</sup>U and <sup>207</sup>Pb/<sup>235</sup>U ratios

<sup>d</sup>Quadratic addition of within-run errors (2 SE) and the all-session reproducibility of Harvard-91500, GJ-1 and Plesovice zircon reference materials (2 SE)

<sup>e</sup>Normalised to the Harvard 91500 reference zircon

<sup>f</sup>Common Pb correction through measured Pb<sup>204</sup> (corrected for Hg<sup>204</sup> using natural abundance Hg isotopic ratios) and the model Pb composition of Stacey & Kramers (1975))

14AP56

|        |                        | CONCENTRATIONS <sup>a</sup> |            |          |            |          |            | RATIOS            |                               |                         |                                                  |                         |                  | AGES                                              |                         |                                                  |                         |                                                  |                         |                                                   |                         |
|--------|------------------------|-----------------------------|------------|----------|------------|----------|------------|-------------------|-------------------------------|-------------------------|--------------------------------------------------|-------------------------|------------------|---------------------------------------------------|-------------------------|--------------------------------------------------|-------------------------|--------------------------------------------------|-------------------------|---------------------------------------------------|-------------------------|
| Sample | Analysis               | U [ppm]                     | 2 $\sigma$ | Th [ppm] | 2 $\sigma$ | Pb [ppm] | 2 $\sigma$ | U/Th <sup>a</sup> | <sup>235</sup> U <sup>b</sup> | 2 $\sigma$ <sup>d</sup> | <sup>206</sup> Pb/ <sup>238</sup> U <sup>b</sup> | 2 $\sigma$ <sup>d</sup> | rho <sup>c</sup> | <sup>207</sup> Pb/ <sup>206</sup> Pb <sup>e</sup> | 2 $\sigma$ <sup>d</sup> | <sup>207</sup> Pb/ <sup>235</sup> U <sup>b</sup> | 2 $\sigma$ <sup>d</sup> | <sup>206</sup> Pb/ <sup>238</sup> U <sup>b</sup> | 2 $\sigma$ <sup>d</sup> | <sup>207</sup> Pb/ <sup>206</sup> Pb <sup>e</sup> | 2 $\sigma$ <sup>d</sup> |
| 14AP56 | Zircon_Sample-059.FIN2 | 803                         | 32         | 944      | 62         | 23       | 1          | 0.8               | 0.065                         | 0.004                   | 0.009                                            | 0.000                   | 0.739            | 0.0499                                            | 0.0031                  | 64.2                                             | 4                       | 60.77                                            | 0.77                    | 180                                               | 130                     |
| 14AP56 | Zircon_sample-007.FIN2 | 192                         | 8          | 228      | 12         | 6        | 0          | 0.9               | 0.079                         | 0.005                   | 0.011                                            | 0.000                   | 0.019            | 0.0501                                            | 0.0030                  | 77.2                                             | 4.3                     | 73.6                                             | 1.3                     | 190                                               | 130                     |
| 14AP56 | Zircon_Sample-087.FIN2 | 601                         | 35         | 162      | 7          | 6        | 0          | 3.7               | 0.094                         | 0.004                   | 0.014                                            | 0.000                   | 0.191            | 0.0476                                            | 0.0018                  | 91.1                                             | 3.9                     | 90.04                                            | 0.89                    | 56                                                | 94                      |
| 14AP56 | Zircon_Sample-164.FIN2 | 430                         | 50         | 257      | 34         | 10       | 1          | 1.7               | 0.094                         | 0.006                   | 0.015                                            | 0.000                   | 0.049            | 0.0466                                            | 0.0027                  | 90.9                                             | 5.2                     | 93.6                                             | 1.5                     | 40                                                | 110                     |
| 14AP56 | Zircon_Sample-101.FIN2 | 409                         | 10         | 215      | 14         | 8        | 0          | 1.9               | 0.106                         | 0.007                   | 0.015                                            | 0.000                   | 0.014            | 0.0516                                            | 0.0037                  | 102.7                                            | 6.3                     | 95.2                                             | 1.1                     | 260                                               | 160                     |
| 14AP56 | Zircon_Sample-203.FIN2 | 128                         | 19         | 156      | 33         | 7        | 1          | 0.9               | 0.117                         | 0.009                   | 0.018                                            | 0.000                   | 0.056            | 0.0483                                            | 0.0037                  | 112.3                                            | 7.9                     | 113.4                                            | 1.9                     | 120                                               | 160                     |
| 14AP56 | Zircon_Sample-118.FIN2 | 527                         | 27         | 830      | 68         | 35       | 3          | 0.6               | 0.120                         | 0.004                   | 0.018                                            | 0.000                   | 0.464            | 0.0495                                            | 0.0013                  | 114.6                                            | 3.2                     | 113.6                                            | 1.6                     | 154                                               | 66                      |
| 14AP56 | Zircon_Sample-156.FIN2 | 326                         | 6          | 234      | 15         | 10       | 1          | 1.4               | 0.119                         | 0.004                   | 0.018                                            | 0.000                   | 0.319            | 0.0478                                            | 0.0017                  | 114.4                                            | 3.9                     | 115.05                                           | 0.98                    | 93                                                | 76                      |
| 14AP56 | Zircon_Sample-098.FIN2 | 559                         | 96         | 252      | 16         | 13       | 1          | 2.2               | 0.136                         | 0.006                   | 0.020                                            | 0.000                   | 0.714            | 0.0483                                            | 0.0016                  | 129.3                                            | 5.1                     | 129.2                                            | 1.3                     | 113                                               | 75                      |
| 14AP56 | Zircon_Sample-102.FIN2 | 702                         | 31         | 603      | 65         | 30       | 3          | 1.2               | 0.137                         | 0.003                   | 0.021                                            | 0.000                   | 0.187            | 0.0477                                            | 0.0012                  | 129.9                                            | 2.9                     | 133.2                                            | 1.2                     | 86                                                | 57                      |
| 14AP56 | Zircon_Sample-126.FIN2 | 58                          | 2          | 167      | 8          | 9        | 0          | 0.3               | 0.158                         | 0.012                   | 0.023                                            | 0.001                   | 0.308            | 0.0494                                            | 0.0045                  | 148                                              | 10                      | 146.6                                            | 3.6                     | 150                                               | 180                     |
| 14AP56 | Zircon_Sample-189.FIN2 | 311                         | 28         | 460      | 140        | 26       | 6          | 0.7               | 0.178                         | 0.007                   | 0.025                                            | 0.000                   | 0.445            | 0.0515                                            | 0.0017                  | 166.4                                            | 5.8                     | 158.2                                            | 2.6                     | 256                                               | 74                      |
| 14AP56 | Zircon_Sample-195.FIN2 | 465                         | 21         | 730      | 320        | 41       | 17         | 0.9               | 0.186                         | 0.006                   | 0.026                                            | 0.000                   | 0.146            | 0.0524                                            | 0.0015                  | 172.7                                            | 5.5                     | 163.1                                            | 1.7                     | 302                                               | 66                      |
| 14AP56 | Zircon_Sample-194.FIN2 | 336                         | 44         | 154      | 9          | 9        | 1          | 2.1               | 0.179                         | 0.005                   | 0.026                                            | 0.000                   | 0.176            | 0.0500                                            | 0.0016                  | 166.9                                            | 4.4                     | 165.3                                            | 1.4                     | 189                                               | 72                      |
| 14AP56 | Zircon_sample-046.FIN2 | 69                          | 2          | 75       | 2          | 5        | 0          | 0.9               | 0.188                         | 0.013                   | 0.027                                            | 0.000                   | 0.260            | 0.0517                                            | 0.0038                  | 174                                              | 11                      | 170                                              | 2.8                     | 260                                               | 160                     |
| 14AP56 | Zircon_sample-022.FIN2 | 183                         | 30         | 318      | 70         | 21       | 5          | 0.6               | 0.214                         | 0.012                   | 0.028                                            | 0.000                   | 0.138            | 0.0555                                            | 0.0032                  | 196                                              | 10                      | 177.7                                            | 1.5                     | 410                                               | 130                     |
| 14AP56 | Zircon_Sample-104.FIN2 | 977                         | 41         | 525      | 29         | 35       | 2          | 1.9               | 0.197                         | 0.003                   | 0.028                                            | 0.000                   | 0.418            | 0.0501                                            | 0.0010                  | 182.9                                            | 2.9                     | 180.8                                            | 2.2                     | 195                                               | 45                      |
| 14AP56 | Zircon_Sample-103.FIN2 | 216                         | 11         | 273      | 18         | 21       | 2          | 0.8               | 0.202                         | 0.014                   | 0.030                                            | 0.000                   | 0.848            | 0.0491                                            | 0.0024                  | 186                                              | 11                      | 190.4                                            | 3                       | 150                                               | 110                     |
| 14AP56 | Zircon_Sample-073.FIN2 | 85                          | 4          | 69       | 5          | 5        | 0          | 1.2               | 0.232                         | 0.020                   | 0.031                                            | 0.001                   | 0.242            | 0.0536                                            | 0.0055                  | 212                                              | 16                      | 195.8                                            | 5.1                     | 330                                               | 220                     |
| 14AP56 | Zircon_Sample-128.FIN2 | 156                         | 22         | 82       | 14         | 6        | 1          | 1.9               | 0.230                         | 0.009                   | 0.032                                            | 0.000                   | 0.048            | 0.0525                                            | 0.0019                  | 210.1                                            | 7.1                     | 201.6                                            | 1.9                     | 302                                               | 83                      |
| 14AP56 | Zircon_sample-027.FIN2 | 391                         | 10         | 288      | 13         | 23       | 1          | 1.4               | 0.240                         | 0.008                   | 0.033                                            | 0.000                   | 0.473            | 0.0525                                            | 0.0016                  | 218.4                                            | 6.7                     | 209.6                                            | 1.7                     | 302                                               | 67                      |
| 14AP56 | Zircon_Sample-088.FIN2 | 187                         | 22         | 116      | 27         | 9        | 2          | 1.7               | 0.238                         | 0.007                   | 0.035                                            | 0.000                   | 0.574            | 0.0494                                            | 0.0017                  | 216.8                                            | 5.7                     | 221.4                                            | 2.5                     | 161                                               | 77                      |
| 14AP56 | Zircon_Sample-155.FIN2 | 124                         | 13         | 103      | 19         | 10       | 2          | 1.3               | 0.317                         | 0.046                   | 0.035                                            | 0.001                   | 0.745            | 0.0647                                            | 0.0084                  | 278                                              | 34                      | 223.6                                            | 5.4                     | 790                                               | 270                     |
| 14AP56 | Zircon_sample-021.FIN2 | 45                          | 2          | 78       | 4          | 7        | 0          | 0.6               | 0.303                         | 0.016                   | 0.038                                            | 0.001                   | 0.220            | 0.0588                                            | 0.0030                  | 269                                              | 13                      | 237.5                                            | 5.7                     | 600                                               | 130                     |
| 14AP56 | Zircon_Sample-049.FIN2 | 300                         | 24         | 156      | 17         | 15       | 2          | 1.9               | 0.284                         | 0.010                   | 0.039                                            | 0.000                   | 0.004            | 0.0533                                            | 0.0021                  | 253.7                                            | 7.7                     | 246.2                                            | 1.9                     | 331                                               | 88                      |
| 14AP56 | Zircon_Sample-064.FIN2 | 267                         | 43         | 281      | 87         | 25       | 8          | 1.1               | 0.282                         | 0.011                   | 0.040                                            | 0.001                   | 0.320            | 0.0514                                            | 0.0020                  | 252.4                                            | 9                       | 250.4                                            | 3.4                     | 255                                               | 88                      |
| 14AP56 | Zircon_Sample-182.FIN2 | 179                         | 17         | 552      | 54         | 49       | 5          | 0.3               | 0.291                         | 0.011                   | 0.040                                            | 0.000                   | 0.111            | 0.0531                                            | 0.0017                  | 259                                              | 8.4                     | 253                                              | 2.9                     | 324                                               | 75                      |
| 14AP56 | Zircon_Sample-060.FIN2 | 279                         | 38         | 240      | 31         | 24       | 3          | 1.1               | 0.298                         | 0.015                   | 0.040                                            | 0.000                   | 0.464            | 0.0536                                            | 0.0025                  | 269                                              | 14                      | 254.7                                            | 2.8                     | 380                                               | 120                     |
| 14AP56 | Zircon_Sample-138.FIN2 | 295                         | 39         | 213      | 30         | 21       | 3          | 1.4               | 0.295                         | 0.009                   | 0.042                                            | 0.000                   | 0.416            | 0.0520                                            | 0.0013                  | 262.7                                            | 7.2                     | 262.5                                            | 3                       | 280                                               | 59                      |
| 14AP56 | Zircon_Sample-181.FIN2 | 1040                        | 31         | 457      | 27         | 44       | 2          | 2.2               | 0.297                         | 0.006                   | 0.042                                            | 0.000                   | 0.026            | 0.0524                                            | 0.0016                  | 264.1                                            | 4.9                     | 262.6                                            | 1.8                     | 298                                               | 69                      |
| 14AP56 | Zircon_Sample-166.FIN2 | 335                         | 58         | 163      | 14         | 16       | 1          | 2.1               | 0.289                         | 0.011                   | 0.042                                            | 0.001                   | 0.301            | 0.0509                                            | 0.0015                  | 257.9                                            | 8.5                     | 265.7                                            | 3.3                     | 234                                               | 69                      |
| 14AP56 | Zircon_Sample-152.FIN2 | 225                         | 28         | 350      | 35         | 34       | 2          | 0.6               | 0.378                         | 0.040                   | 0.042                                            | 0.000                   | 0.549            | 0.0627                                            | 0.0057                  | 324                                              | 29                      | 267.9                                            | 2.9                     | 720                                               | 210                     |
| 14AP56 | Zircon_Sample-169.FIN2 | 372                         | 25         | 618      | 55         | 69       | 7          | 0.6               | 0.334                         | 0.015                   | 0.046                                            | 0.001                   | 0.683            | 0.0541                                            | 0.0025                  | 298                                              | 15                      | 286.9                                            | 3.1                     | 370                                               | 100                     |
| 14AP56 | Zircon_Sample-127.FIN2 | 187                         | 18         | 318      | 50         | 33       | 5          | 0.6               | 0.340                         | 0.013                   | 0.046                                            | 0.000                   | 0.188            | 0.0535                                            | 0.0020                  | 296.8                                            | 9.6                     | 289                                              | 2                       | 367                                               | 91                      |
| 14AP56 | Zircon_Sample-092.FIN2 | 137                         | 7          | 233      | 18         | 25       | 2          | 0.6               | 0.348                         | 0.015                   | 0.047                                            | 0.000                   | 0.525            | 0.0546                                            | 0.0023                  | 303                                              | 11                      | 293.2                                            | 2.8                     | 389                                               | 97                      |
| 14AP56 | Zircon_Sample-202.FIN2 | 111                         | 6          | 201      | 13         | 24       | 1          | 0.6               | 0.342                         | 0.012                   | 0.047                                            | 0.000                   | 0.238            | 0.0530                                            | 0.0019                  | 298.4                                            | 9.1                     | 294.7                                            | 2.1                     | 323                                               | 82                      |
| 14AP56 | Zircon_Sample-053.FIN2 | 124                         | 8          | 211      | 14         | 23       | 1          | 0.6               | 0.341                         | 0.016                   | 0.047                                            | 0.000                   | 0.214            | 0.0519                                            | 0.0023                  | 298                                              | 12                      | 296.5                                            | 3                       | 270                                               | 97                      |
| 14AP56 | Zircon_Sample-111.FIN2 | 334                         | 11         | 204      | 10         | 23       | 1          | 1.6               | 0.351                         | 0.014                   | 0.047                                            | 0.000                   | 0.104            | 0.0537                                            | 0.0021                  | 306                                              | 10                      | 298.1                                            | 1.7                     | 351                                               | 85                      |
| 14AP56 | Zircon_sample-023.FIN2 | 195                         | 14         | 128      | 12         | 14       | 2          | 1.5               | 0.351                         | 0.012                   | 0.048                                            | 0.001                   | 0.090            | 0.0533                                            | 0.0017                  | 305.6                                            | 8.7                     | 300                                              | 4.2                     | 335                                               | 73                      |
| 14AP56 | Zircon_sample-020.FIN2 | 120                         | 23         | 109      | 23         | 13       | 3          | 1.1               | 0.376                         | 0.027                   | 0.049                                            | 0.001                   | 0.942            | 0.0553                                            | 0.0034                  | 323                                              | 20                      | 306.4                                            | 4.7                     | 410                                               | 140                     |
| 14AP56 | Zircon_Sample-157.FIN2 | 128                         | 6          | 59       | 2          | 6        | 0          | 2.1               | 0.356                         | 0.011                   | 0.049                                            | 0.001                   | 0.518            | 0.0534                                            | 0.0018                  | 309.2                                            | 8.1                     | 306.5                                            | 4.8                     | 358                                               | 70                      |
| 14AP56 | Zircon_Sample-062.FIN2 | 628                         | 84         | 800      | 160        | 95       | 18         | 0.8               | 0.361                         | 0.007                   | 0.049                                            | 0.000                   | 0.214            | 0.0538                                            | 0.0009                  | 313.1                                            | 4.8                     | 309.4                                            | 2.1                     | 362                                               | 38                      |
| 14AP56 | Zircon_Sample-047.FIN2 | 256                         | 16         | 302      | 72         | 36       | 8          | 1.0               | 0.368                         | 0.008                   | 0.051                                            | 0.000                   | 0.107            | 0.0530                                            | 0.0012                  | 317.8                                            | 5.7                     | 318.1                                            | 2.8                     | 327                                               | 51                      |
| 14AP56 | Zircon_sample-034.FIN2 | 325                         | 19         | 385      | 42         | 46       | 5          | 0.8               | 0.378                         | 0.008                   | 0.051                                            | 0.000                   | 0.199            | 0.0542                                            | 0.0010                  | 325.6                                            | 5.7                     | 320                                              | 1.8                     | 378                                               | 43                      |
| 14AP56 | Zircon_Sample-167.FIN2 | 64                          | 5          | 65       | 17         | 8        | 2          | 1.4               | 0.381                         | 0.023                   | 0.052                                            | 0.001                   | 0.204            | 0.0544                                            | 0.0035                  | 327                                              | 17                      | 327.8                                            | 5.9                     | 370                                               | 140                     |
| 14AP56 | Zircon_sample-008.FIN2 | 102                         | 10         | 97       | 13         | 12       | 1          | 1.1               | 0.393                         | 0.019                   | 0.053                                            | 0.000                   | 0.142            | 0.0538                                            | 0.0025                  | 336                                              | 14                      | 331.8                                            | 3                       | 350                                               | 100                     |
| 14AP56 | Zircon_Sample-048.FIN2 | 161                         | 11         | 218      | 29         | 27       | 3          | 0.8               | 0.385                         | 0.019                   | 0.053                                            | 0.000                   | 0.348            | 0.0526                                            | 0.0025                  | 330                                              | 14                      | 332.8                                            | 2.3                     | 330                                               | 120                     |
| 14AP56 | Zircon_sample-026.FIN2 | 473                         | 31         | 425      | 27         | 55       | 2          | 1.1               | 0.397                         | 0.010                   | 0.055                                            | 0.000                   | 0.430            | 0.0519                                            | 0.0010                  | 339.1                                            | 7.2                     | 344                                              | 2.5                     | 280                                               | 46                      |
| 14AP56 | Zircon_Sample-206.FIN2 | 220                         | 28         | 228      | 51         | 32       | 6          | 1.0               | 0.425                         | 0.024                   | 0.057                                            | 0.001                   | 0.392            | 0.0544                                            | 0.0029                  | 359                                              | 17                      | 356.4                                            | 5.1                     | 370                                               | 120                     |
| 14AP56 | Zircon_Sample-208.FIN2 | 79                          | 6          | 57       | 6          | 8        | 1          | 1.4               | 0.423                         | 0.024                   | 0.058                                            | 0.001                   | 0.069            | 0.0539                                            | 0.0037                  | 358                                              | 17                      | 363                                              | 3.9                     | 350                                               | 150                     |
| 14AP56 | Zircon_Sample-176.FIN2 | 177                         | 21         | 114      | 19         | 15       | 2          | 1.6               | 0.437                         | 0.014                   | 0.059                                            | 0.001                   | 0.339            | 0.0532                                            | 0.0019                  | 367.7                                            | 9.9                     | 369                                              | 5.1                     | 348                                               | 74                      |
| 14AP56 | Zircon_Sample-180.FIN2 | 136                         | 19         | 149      | 32         | 20       | 4          | 0.9               | 0.464                         | 0.023                   | 0.060                                            | 0.001                   | 0.184            | 0.0566                                            | 0.0025                  | 386                                              | 16                      | 372.5                                            | 7.1                     | 465                                               | 98                      |
| 14AP56 | Zircon_Sample-075.FIN2 | 55                          | 1          | 31       | 1          | 5        | 0          | 1.8               | 0.582                         | 0.051                   | 0.072                                            | 0.001                   | 0.482            | 0.0587                                            | 0.0047                  | 465                                              | 33                      | 449.5                                            | 3.3                     | 540                                               | 190                     |
| 14AP56 | Zircon_Sample-065.FIN2 | 113                         | 30         | 142      | 39         | 25       | 7          | 0.8               | 0.602                         | 0.030                   | 0.076                                            | 0.001                   | -0.902           | 0.0570                                            | 0.0035                  | 478                                              | 19                      | 474.9                                            | 6.3                     | 480                                               | 140                     |
| 14AP56 | Zircon_Sample-124.FIN2 | 433                         | 63         | 494      | 84         | 87       | 15         | 0.9               | 0.626                         | 0.024                   | 0.077                                            | 0.001                   | 0.615            | 0.0585                                            | 0.0019                  | 493                                              | 15                      | 479.9                                            | 5.5                     | 544                                               | 71                      |
| 14AP56 | Zircon_Sample-077.FIN2 | 202                         | 13         | 161      | 19         | 29       | 4          | 1.3               | 0.616                         | 0.022                   | 0.077                                            | 0.001                   | 0.628            | 0.0578                                            | 0.0017                  | 487                                              | 14                      | 480.7                                            | 4.4                     | 519                                               | 64                      |
| 14AP56 | Zircon_sample-025.FIN2 | 118                         | 8          | 114      | 8          | 21       | 1          | 1.0               | 0.625                         | 0.023                   | 0.081                                            | 0.001                   | 0.063            | 0.0561                                            | 0.0025                  | 496                                              | 16                      | 504.7                                            | 5.1                     | 441                                               | 98                      |
| 14AP56 | Zircon_sample-039.FIN2 | 349                         | 20         | 247      | 19         | 50       | 3          | 1.4               | 0.678                         | 0.022                   | 0.082                                            | 0.001                   | 0.213            | 0.0598                                            | 0.0020                  | 525                                              | 13                      | 508.8                                            | 3.9                     | 608                                               | 75                      |
| 14AP56 | Zircon_Sample-061.FIN2 | 224                         | 19         | 240      | 19         | 48       | 3</        |                   |                               |                         |                                                  |                         |                  |                                                   |                         |                                                  |                         |                                                  |                         |                                                   |                         |

|        |                        |     |    |     |    |     |    |      |        |       |       |       |       |        |        |        |     |      |     |        |     |
|--------|------------------------|-----|----|-----|----|-----|----|------|--------|-------|-------|-------|-------|--------|--------|--------|-----|------|-----|--------|-----|
| 14AP56 | Zircon_Sample-142.FIN2 | 223 | 34 | 136 | 9  | 83  | 6  | 1.7  | 4.160  | 0.074 | 0.275 | 0.005 | 0.841 | 0.1098 | 0.0010 | 1666   | 15  | 1567 | 24  | 1796   | 17  |
| 14AP56 | Zircon_Sample-072.FIN2 | 756 | 42 | 124 | 20 | 84  | 14 | 6.3  | 4.205  | 0.060 | 0.276 | 0.003 | 0.919 | 0.1097 | 0.0006 | 1675   | 12  | 1573 | 14  | 1793.6 | 9.3 |
| 14AP56 | Zircon_Sample-079.FIN2 | 158 | 14 | 171 | 22 | 110 | 11 | 0.9  | 4.127  | 0.070 | 0.295 | 0.002 | 0.610 | 0.1010 | 0.0012 | 1659   | 14  | 1664 | 11  | 1643   | 23  |
| 14AP56 | Zircon_Sample-151.FIN2 | 175 | 13 | 196 | 16 | 122 | 8  | 0.9  | 4.182  | 0.028 | 0.298 | 0.002 | 0.821 | 0.1020 | 0.0007 | 1670.4 | 5.5 | 1682 | 11  | 1660   | 12  |
| 14AP56 | Zircon_Sample-115.FIN2 | 104 | 11 | 96  | 11 | 64  | 8  | 1.1  | 4.909  | 0.096 | 0.310 | 0.003 | 0.788 | 0.1141 | 0.0011 | 1803   | 16  | 1743 | 15  | 1865   | 18  |
| 14AP56 | Zircon_Sample-091.FIN2 | 359 | 42 | 148 | 18 | 107 | 8  | 2.4  | 5.160  | 0.180 | 0.317 | 0.011 | 0.976 | 0.1185 | 0.0007 | 1845   | 29  | 1773 | 53  | 1934   | 11  |
| 14AP56 | Zircon_Sample-099.FIN2 | 147 | 4  | 117 | 16 | 79  | 3  | 1.3  | 4.970  | 0.100 | 0.321 | 0.006 | 0.914 | 0.1135 | 0.0009 | 1818   | 16  | 1794 | 27  | 1856   | 15  |
| 14AP56 | Zircon_Sample-178.FIN2 | 137 | 3  | 106 | 3  | 72  | 3  | 1.3  | 5.082  | 0.062 | 0.329 | 0.002 | 0.563 | 0.1124 | 0.0012 | 1833   | 10  | 1834 | 11  | 1838   | 19  |
| 14AP56 | Zircon_sample-033.FIN2 | 195 | 10 | 171 | 8  | 119 | 6  | 1.1  | 5.122  | 0.064 | 0.330 | 0.003 | 0.735 | 0.1130 | 0.0010 | 1839   | 11  | 1838 | 16  | 1848   | 16  |
| 14AP56 | Zircon_sample-038.FIN2 | 381 | 28 | 291 | 22 | 211 | 11 | 1.3  | 5.159  | 0.049 | 0.331 | 0.003 | 0.519 | 0.1131 | 0.0008 | 1845.7 | 8   | 1843 | 12  | 1850   | 13  |
| 14AP56 | Zircon_Sample-137.FIN2 | 85  | 2  | 56  | 1  | 40  | 2  | 1.5  | 5.225  | 0.066 | 0.332 | 0.002 | 0.416 | 0.1148 | 0.0018 | 1861   | 13  | 1846 | 11  | 1875   | 27  |
| 14AP56 | Zircon_sample-010.FIN2 | 74  | 4  | 72  | 4  | 52  | 2  | 1.0  | 5.035  | 0.079 | 0.335 | 0.003 | 0.425 | 0.1097 | 0.0018 | 1825   | 13  | 1860 | 15  | 1801   | 27  |
| 14AP56 | Zircon_Sample-114.FIN2 | 116 | 4  | 87  | 2  | 62  | 2  | 1.3  | 5.204  | 0.081 | 0.334 | 0.004 | 0.481 | 0.1127 | 0.0012 | 1853   | 13  | 1860 | 21  | 1843   | 19  |
| 14AP56 | Zircon_sample-014.FIN2 | 115 | 6  | 66  | 3  | 50  | 2  | 1.8  | 5.395  | 0.099 | 0.343 | 0.005 | 0.722 | 0.1136 | 0.0012 | 1888   | 14  | 1899 | 23  | 1857   | 19  |
| 14AP56 | Zircon_Sample-144.FIN2 | 152 | 11 | 80  | 4  | 57  | 2  | 1.9  | 5.404  | 0.080 | 0.343 | 0.004 | 0.754 | 0.1141 | 0.0012 | 1885   | 13  | 1902 | 20  | 1865   | 19  |
| 14AP56 | Zircon_Sample-066.FIN2 | 85  | 3  | 60  | 2  | 45  | 1  | 1.4  | 5.350  | 0.100 | 0.344 | 0.006 | 0.837 | 0.1123 | 0.0012 | 1877   | 17  | 1904 | 27  | 1836   | 20  |
| 14AP56 | Zircon_Sample-183.FIN2 | 177 | 9  | 123 | 4  | 87  | 3  | 1.4  | 5.640  | 0.061 | 0.345 | 0.003 | 0.768 | 0.1190 | 0.0010 | 1922   | 9.2 | 1909 | 15  | 1940   | 14  |
| 14AP56 | Zircon_sample-012.FIN2 | 172 | 8  | 160 | 8  | 122 | 5  | 1.1  | 5.790  | 0.100 | 0.350 | 0.005 | 0.844 | 0.1204 | 0.0009 | 1944   | 15  | 1933 | 21  | 1962   | 13  |
| 14AP56 | Zircon_sample-036.FIN2 | 276 | 25 | 114 | 10 | 88  | 8  | 2.5  | 5.880  | 0.230 | 0.354 | 0.013 | 0.966 | 0.1200 | 0.0011 | 1955   | 34  | 1952 | 62  | 1956   | 16  |
| 14AP56 | Zircon_Sample-074.FIN2 | 229 | 20 | 140 | 25 | 105 | 17 | 1.7  | 6.090  | 0.110 | 0.361 | 0.009 | 0.866 | 0.1210 | 0.0015 | 1989   | 16  | 1987 | 42  | 1977   | 19  |
| 14AP56 | Zircon_Sample-150.FIN2 | 312 | 10 | 196 | 10 | 144 | 9  | 1.6  | 6.265  | 0.060 | 0.365 | 0.003 | 0.654 | 0.1248 | 0.0010 | 2013.4 | 8.3 | 2004 | 13  | 2026   | 14  |
| 14AP56 | Zircon_Sample-130.FIN2 | 225 | 6  | 164 | 13 | 138 | 15 | 1.3  | 6.010  | 0.100 | 0.366 | 0.004 | 0.833 | 0.1182 | 0.0012 | 1977   | 15  | 2012 | 18  | 1928   | 18  |
| 14AP56 | Zircon_Sample-085.FIN2 | 159 | 17 | 55  | 8  | 43  | 5  | 3.0  | 6.260  | 0.110 | 0.368 | 0.004 | 0.799 | 0.1235 | 0.0009 | 2012   | 16  | 2020 | 21  | 2007   | 13  |
| 14AP56 | Zircon_sample-024.FIN2 | 174 | 10 | 89  | 5  | 70  | 2  | 2.0  | 6.235  | 0.074 | 0.376 | 0.004 | 0.717 | 0.1199 | 0.0009 | 2009   | 10  | 2056 | 17  | 1955   | 13  |
| 14AP56 | Zircon_sample-009.FIN2 | 86  | 3  | 48  | 1  | 38  | 1  | 1.8  | 6.467  | 0.080 | 0.380 | 0.004 | 0.799 | 0.1230 | 0.0008 | 2041   | 11  | 2077 | 21  | 2000   | 11  |
| 14AP56 | Zircon_Sample-112.FIN2 | 78  | 2  | 80  | 2  | 66  | 2  | 1.0  | 7.144  | 0.077 | 0.392 | 0.004 | 0.642 | 0.1331 | 0.0017 | 2129.4 | 9.7 | 2132 | 17  | 2139   | 22  |
| 14AP56 | Zircon_Sample-113.FIN2 | 70  | 2  | 53  | 3  | 46  | 4  | 1.3  | 8.640  | 0.180 | 0.403 | 0.005 | 0.814 | 0.1553 | 0.0024 | 2300   | 20  | 2181 | 24  | 2405   | 26  |
| 14AP56 | Zircon_sample-011.FIN2 | 317 | 50 | 156 | 24 | 128 | 17 | 2.1  | 8.960  | 0.170 | 0.404 | 0.007 | 0.946 | 0.1601 | 0.0011 | 2333   | 18  | 2188 | 34  | 2456   | 12  |
| 14AP56 | Zircon_Sample-196.FIN2 | 725 | 40 | 46  | 4  | 46  | 4  | 15.8 | 9.290  | 0.180 | 0.424 | 0.010 | 0.923 | 0.1599 | 0.0014 | 2367   | 18  | 2280 | 46  | 2455   | 15  |
| 14AP56 | Zircon_Sample-089.FIN2 | 264 | 24 | 112 | 47 | 62  | 17 | 4.1  | 11.110 | 0.680 | 0.452 | 0.024 | 0.976 | 0.1754 | 0.0033 | 2524   | 60  | 2400 | 110 | 2608   | 32  |
| 14AP56 | Zircon_sample-037.FIN2 | 292 | 9  | 133 | 4  | 128 | 3  | 2.2  | 11.280 | 0.130 | 0.453 | 0.006 | 0.871 | 0.1801 | 0.0010 | 2547   | 11  | 2408 | 25  | 2653.8 | 9.5 |
| 14AP56 | Zircon_Sample-141.FIN2 | 319 | 34 | 365 | 64 | 369 | 71 | 0.9  | 11.796 | 0.096 | 0.469 | 0.003 | 0.658 | 0.1827 | 0.0011 | 2588.2 | 7.6 | 2480 | 15  | 2677.7 | 9.6 |
| 14AP56 | Zircon_Sample-129.FIN2 | 233 | 13 | 109 | 9  | 102 | 7  | 2.2  | 11.790 | 0.200 | 0.473 | 0.008 | 0.966 | 0.1803 | 0.0012 | 2587   | 16  | 2498 | 34  | 2656   | 11  |
| 14AP56 | Zircon_Sample-090.FIN2 | 65  | 5  | 69  | 6  | 67  | 4  | 0.9  | 11.230 | 0.140 | 0.480 | 0.007 | 0.766 | 0.1667 | 0.0018 | 2542   | 12  | 2528 | 32  | 2524   | 18  |
| 14AP56 | Zircon_sample-040.FIN2 | 101 | 6  | 93  | 6  | 97  | 4  | 1.1  | 12.550 | 0.130 | 0.495 | 0.005 | 0.583 | 0.1823 | 0.0016 | 2646   | 9.9 | 2593 | 23  | 2673   | 15  |
| 14AP56 | Zircon_Sample-207.FIN2 | 158 | 18 | 217 | 34 | 222 | 32 | 0.8  | 12.820 | 0.140 | 0.502 | 0.005 | 0.866 | 0.1860 | 0.0013 | 2666   | 11  | 2620 | 21  | 2707   | 12  |
| 14AP56 | Zircon_Sample-140.FIN2 | 253 | 18 | 185 | 13 | 197 | 8  | 1.4  | 13.620 | 0.380 | 0.527 | 0.011 | 0.981 | 0.1854 | 0.0012 | 2722   | 26  | 2747 | 34  | 2702   | 11  |
| 14AP56 | Zircon_Sample-165.FIN2 | 92  | 16 | 163 | 25 | 182 | 25 | 0.5  | 13.840 | 0.420 | 0.539 | 0.016 | 0.971 | 0.1862 | 0.0011 | 2737   | 29  | 2778 | 68  | 2708.3 | 9.9 |
| 14AP56 | Zircon_sample-013.FIN2 | 253 | 16 | 132 | 8  | 157 | 6  | 2.0  | 16.590 | 0.260 | 0.568 | 0.009 | 0.912 | 0.2101 | 0.0015 | 2911   | 15  | 2899 | 35  | 2906   | 12  |
| 14AP56 | Zircon_Sample-204.FIN2 | 206 | 25 | 214 | 27 | 264 | 27 | 1.0  | 21.970 | 0.380 | 0.641 | 0.010 | 0.934 | 0.2499 | 0.0016 | 3182   | 17  | 3192 | 38  | 3184   | 10  |

<sup>a</sup>U, Th and Pb concentrations with errors (2SE) and U/Th ratios are calculated relative to the Harvard 91500 reference zircon

<sup>b</sup>Corrected for background, downhole and within-run Pb/U fractionation. Normalised to the reference zircon Harvard 91500 (TIMS/measured values). The <sup>207</sup>Pb/<sup>235</sup>U is calculated through: (<sup>207</sup>Pb/<sup>206</sup>Pb)/((<sup>238</sup>U/<sup>206</sup>Pb \* 1/137.88)

<sup>c</sup>Rho is the error correlation defined as the quotient of the propagated errors of the <sup>206</sup>Pb/<sup>238</sup>U and <sup>207</sup>Pb/<sup>235</sup>U ratios

<sup>d</sup>Quadratic addition of within-run errors (2 SE) and the all-session reproducibility of Harvard-91500, GJ-1 and Plesovice zircon reference materials (2 SE)

<sup>e</sup>Normalised to the Harvard 91500 reference zircon

14AP59

|        |                        | CONCENTRATIONS <sup>a</sup> |            |          |            |          |            | RATIOS            |                                                  |                         |                                                  |                         |                  | AGES                                              |                         |                                                  |                         |                                                  |                         |                                                   |                         |
|--------|------------------------|-----------------------------|------------|----------|------------|----------|------------|-------------------|--------------------------------------------------|-------------------------|--------------------------------------------------|-------------------------|------------------|---------------------------------------------------|-------------------------|--------------------------------------------------|-------------------------|--------------------------------------------------|-------------------------|---------------------------------------------------|-------------------------|
| Sample | Analysis               | U [ppm]                     | 2 $\sigma$ | Th [ppm] | 2 $\sigma$ | Pb [ppm] | 2 $\sigma$ | U/Th <sup>a</sup> | <sup>207</sup> Pb/ <sup>235</sup> U <sup>b</sup> | 2 $\sigma$ <sup>d</sup> | <sup>206</sup> Pb/ <sup>238</sup> U <sup>b</sup> | 2 $\sigma$ <sup>d</sup> | rho <sup>c</sup> | <sup>207</sup> Pb/ <sup>206</sup> Pb <sup>e</sup> | 2 $\sigma$ <sup>d</sup> | <sup>207</sup> Pb/ <sup>235</sup> U <sup>b</sup> | 2 $\sigma$ <sup>d</sup> | <sup>206</sup> Pb/ <sup>238</sup> U <sup>b</sup> | 2 $\sigma$ <sup>d</sup> | <sup>207</sup> Pb/ <sup>206</sup> Pb <sup>e</sup> | 2 $\sigma$ <sup>d</sup> |
| 14AP59 | Zircon_Sample-078.FIN2 | 470                         | 11         | 319      | 13         | 8        | 0          | 1.5               | 0.071                                            | 0.006                   | 0.009                                            | 0.000                   | 0.676            | 0.0544                                            | 0.0044                  | 69.5                                             | 5.9                     | 60.63                                            | 0.88                    | 360                                               | 180                     |
| 14AP59 | Zircon_Sample-126.FIN2 | 765                         | 46         | 334      | 25         | 14       | 1          | 2.3               | 0.126                                            | 0.006                   | 0.016                                            | 0.000                   | 0.748            | 0.0556                                            | 0.0023                  | 120.2                                            | 5.1                     | 103.11                                           | 0.75                    | 432                                               | 93                      |
| 14AP59 | Zircon_Sample-183.FIN2 | 216                         | 15         | 107      | 5          | 5        | 0          | 2.0               | 0.116                                            | 0.005                   | 0.017                                            | 0.000                   | 0.549            | 0.0485                                            | 0.0017                  | 110.9                                            | 4.1                     | 111.7                                            | 1.5                     | 127                                               | 78                      |
| 14AP59 | Zircon_Sample-048.FIN2 | 575                         | 34         | 265      | 14         | 14       | 0          | 2.2               | 0.137                                            | 0.004                   | 0.020                                            | 0.000                   | 0.333            | 0.0492                                            | 0.0014                  | 130.5                                            | 3.4                     | 129.9                                            | 1.4                     | 155                                               | 65                      |
| 14AP59 | Zircon_Sample-170.FIN2 | 822                         | 66         | 199      | 28         | 11       | 1          | 4.1               | 0.144                                            | 0.006                   | 0.021                                            | 0.000                   | 0.128            | 0.0489                                            | 0.0022                  | 136.4                                            | 5.4                     | 135                                              | 1.2                     | 140                                               | 100                     |
| 14AP59 | Zircon_Sample-098.FIN2 | 562                         | 37         | 427      | 38         | 22       | 1          | 1.3               | 0.150                                            | 0.009                   | 0.021                                            | 0.000                   | 0.490            | 0.0509                                            | 0.0028                  | 141.8                                            | 7.5                     | 135.5                                            | 1.4                     | 230                                               | 120                     |
| 14AP59 | Zircon_Sample-066.FIN2 | 199                         | 11         | 342      | 16         | 20       | 0          | 0.6               | 0.164                                            | 0.005                   | 0.024                                            | 0.000                   | 0.040            | 0.0512                                            | 0.0017                  | 154.5                                            | 3.9                     | 150.2                                            | 2.4                     | 267                                               | 86                      |
| 14AP59 | Zircon_Sample-113.FIN2 | 916                         | 54         | 446      | 94         | 25       | 5          | 2.2               | 0.165                                            | 0.007                   | 0.024                                            | 0.000                   | 0.410            | 0.0503                                            | 0.0019                  | 154.7                                            | 6.4                     | 151.1                                            | 1.9                     | 206                                               | 89                      |
| 14AP59 | Zircon_Sample-203.FIN2 | 157                         | 7          | 117      | 5          | 7        | 0          | 1.4               | 0.171                                            | 0.009                   | 0.024                                            | 0.000                   | 0.296            | 0.0512                                            | 0.0026                  | 160.4                                            | 7.8                     | 155                                              | 2.4                     | 240                                               | 110                     |
| 14AP59 | Zircon_Sample-105.FIN2 | 84                          | 7          | 59       | 8          | 4        | 0          | 1.4               | 0.204                                            | 0.009                   | 0.028                                            | 0.000                   | 0.357            | 0.0532                                            | 0.0024                  | 188.7                                            | 7.3                     | 178                                              | 3.1                     | 330                                               | 100                     |
| 14AP59 | Zircon_Sample-051.FIN2 | 291                         | 43         | 181      | 36         | 17       | 3          | 1.7               | 0.278                                            | 0.009                   | 0.038                                            | 0.000                   | 0.023            | 0.0527                                            | 0.0019                  | 249.3                                            | 7                       | 242.6                                            | 2.7                     | 311                                               | 82                      |
| 14AP59 | Zircon_Sample-052.FIN2 | 96                          | 5          | 211      | 13         | 21       | 1          | 0.5               | 0.276                                            | 0.011                   | 0.039                                            | 0.001                   | 0.224            | 0.0520                                            | 0.0022                  | 247.4                                            | 8.6                     | 246.1                                            | 4.9                     | 280                                               | 94                      |
| 14AP59 | Zircon_Sample-102.FIN2 | 123                         | 12         | 136      | 16         | 12       | 1          | 0.9               | 0.274                                            | 0.015                   | 0.039                                            | 0.001                   | 0.149            | 0.0508                                            | 0.0032                  | 245                                              | 12                      | 247.8                                            | 3.9                     | 260                                               | 150                     |
| 14AP59 | Zircon_Sample-053.FIN2 | 73                          | 14         | 56       | 13         | 6        | 1          | 1.4               | 0.281                                            | 0.015                   | 0.040                                            | 0.001                   | 0.411            | 0.0508                                            | 0.0026                  | 251                                              | 12                      | 254                                              | 4.3                     | 220                                               | 120                     |
| 14AP59 | Zircon_Sample-150.FIN2 | 746                         | 80         | 616      | 88         | 59       | 7          | 1.2               | 0.284                                            | 0.006                   | 0.040                                            | 0.000                   | 0.529            | 0.0511                                            | 0.0008                  | 253.8                                            | 4.3                     | 254.4                                            | 2.6                     | 244                                               | 34                      |
| 14AP59 | Zircon_Sample-124.FIN2 | 269                         | 7          | 212      | 8          | 21       | 1          | 1.3               | 0.292                                            | 0.010                   | 0.041                                            | 0.000                   | 0.150            | 0.0511                                            | 0.0018                  | 259.8                                            | 7.6                     | 259.6                                            | 2.1                     | 267                                               | 91                      |
| 14AP59 | Zircon_Sample-178.FIN2 | 330                         | 18         | 210      | 19         | 23       | 2          | 1.6               | 0.311                                            | 0.009                   | 0.043                                            | 0.000                   | 0.091            | 0.0524                                            | 0.0015                  | 274.6                                            | 7.1                     | 271.3                                            | 2.4                     | 299                                               | 66                      |
| 14AP59 | Zircon_Sample-128.FIN2 | 241                         | 19         | 75       | 10         | 8        | 1          | 3.2               | 0.317                                            | 0.011                   | 0.045                                            | 0.001                   | 0.026            | 0.0509                                            | 0.0020                  | 279.7                                            | 8.7                     | 281.9                                            | 4.1                     | 230                                               | 89                      |
| 14AP59 | Zircon_sample-038.FIN2 | 960                         | 80         | 628      | 75         | 70       | 6          | 1.6               | 0.362                                            | 0.012                   | 0.048                                            | 0.001                   | 0.215            | 0.0546                                            | 0.0020                  | 313.6                                            | 8.8                     | 303                                              | 4.2                     | 392                                               | 79                      |
| 14AP59 | Zircon_sample-025.FIN2 | 207                         | 15         | 174      | 18         | 23       | 2          | 1.2               | 0.362                                            | 0.013                   | 0.049                                            | 0.000                   | 0.095            | 0.0530                                            | 0.0021                  | 313.4                                            | 9.7                     | 309                                              | 2.2                     | 355                                               | 75                      |
| 14AP59 | Zircon_sample-040.FIN2 | 158                         | 9          | 114      | 7          | 14       | 1          | 1.4               | 0.381                                            | 0.014                   | 0.050                                            | 0.001                   | 0.118            | 0.0552                                            | 0.0022                  | 328                                              | 10                      | 313.4                                            | 5.9                     | 414                                               | 89                      |
| 14AP59 | Zircon_sample-020.FIN2 | 1029                        | 52         | 1241     | 87         | 146      | 11         | 0.8               | 0.375                                            | 0.008                   | 0.050                                            | 0.001                   | 0.579            | 0.0536                                            | 0.0009                  | 323.2                                            | 5.8                     | 316.8                                            | 4.6                     | 354                                               | 39                      |
| 14AP59 | Zircon_Sample-074.FIN2 | 456                         | 33         | 365      | 27         | 48       | 3          | 1.3               | 0.401                                            | 0.011                   | 0.053                                            | 0.001                   | 0.578            | 0.0547                                            | 0.0012                  | 342.1                                            | 7.7                     | 333.2                                            | 4.7                     | 397                                               | 51                      |
| 14AP59 | Zircon_Sample-127.FIN2 | 215                         | 16         | 118      | 10         | 17       | 1          | 1.8               | 0.407                                            | 0.013                   | 0.055                                            | 0.001                   | 0.596            | 0.0535                                            | 0.0016                  | 346.8                                            | 9.7                     | 342.4                                            | 4.3                     | 346                                               | 68                      |
| 14AP59 | Zircon_sample-009.FIN2 | 222                         | 35         | 120      | 28         | 17       | 4          | 1.9               | 0.439                                            | 0.022                   | 0.058                                            | 0.001                   | 0.287            | 0.0561                                            | 0.0028                  | 370                                              | 16                      | 364.9                                            | 5.3                     | 450                                               | 110                     |
| 14AP59 | Zircon_Sample-061.FIN2 | 645                         | 23         | 405      | 28         | 59       | 3          | 1.6               | 0.443                                            | 0.010                   | 0.060                                            | 0.000                   | 0.064            | 0.0540                                            | 0.0014                  | 372.5                                            | 7.3                     | 374.5                                            | 3                       | 371                                               | 58                      |
| 14AP59 | Zircon_Sample-090.FIN2 | 189                         | 11         | 131      | 8          | 18       | 1          | 1.4               | 0.469                                            | 0.021                   | 0.062                                            | 0.001                   | 0.393            | 0.0549                                            | 0.0023                  | 390                                              | 14                      | 386.6                                            | 6.4                     | 401                                               | 93                      |
| 14AP59 | Zircon_Sample-163.FIN2 | 153                         | 6          | 166      | 10         | 24       | 2          | 0.9               | 0.508                                            | 0.036                   | 0.063                                            | 0.001                   | 0.655            | 0.0581                                            | 0.0038                  | 416                                              | 24                      | 391.9                                            | 5.2                     | 520                                               | 150                     |
| 14AP59 | Zircon_Sample-168.FIN2 | 274                         | 29         | 323      | 46         | 50       | 6          | 0.9               | 0.499                                            | 0.017                   | 0.063                                            | 0.001                   | 0.391            | 0.0573                                            | 0.0019                  | 411                                              | 12                      | 393.9                                            | 5.8                     | 499                                               | 74                      |
| 14AP59 | Zircon_sample-010.FIN2 | 610                         | 120        | 277      | 50         | 45       | 6          | 2.3               | 0.491                                            | 0.015                   | 0.065                                            | 0.001                   | 0.600            | 0.0556                                            | 0.0014                  | 406                                              | 10                      | 404.5                                            | 4.7                     | 434                                               | 55                      |
| 14AP59 | Zircon_Sample-101.FIN2 | 206                         | 50         | 186      | 64         | 31       | 10         | 1.3               | 0.534                                            | 0.017                   | 0.065                                            | 0.001                   | 0.044            | 0.0588                                            | 0.0019                  | 434                                              | 11                      | 408.4                                            | 4.8                     | 554                                               | 71                      |
| 14AP59 | Zircon_sample-039.FIN2 | 778                         | 34         | 266      | 19         | 45       | 3          | 3.0               | 0.521                                            | 0.011                   | 0.067                                            | 0.001                   | 0.804            | 0.0557                                            | 0.0007                  | 425.5                                            | 7.4                     | 418.6                                            | 4                       | 441                                               | 27                      |
| 14AP59 | Zircon_Sample-049.FIN2 | 139                         | 10         | 110      | 6          | 18       | 1          | 1.3               | 0.534                                            | 0.033                   | 0.070                                            | 0.001                   | 0.798            | 0.0552                                            | 0.0026                  | 434                                              | 22                      | 434.4                                            | 5.9                     | 410                                               | 110                     |
| 14AP59 | Zircon_sample-012.FIN2 | 164                         | 9          | 87       | 6          | 17       | 1          | 2.0               | 0.571                                            | 0.008                   | 0.074                                            | 0.001                   | 0.178            | 0.0555                                            | 0.0012                  | 458.7                                            | 5.5                     | 462.4                                            | 5.1                     | 429                                               | 47                      |
| 14AP59 | Zircon_Sample-118.FIN2 | 283                         | 24         | 176      | 29         | 32       | 5          | 1.6               | 0.630                                            | 0.016                   | 0.076                                            | 0.001                   | 0.183            | 0.0594                                            | 0.0017                  | 496                                              | 10                      | 474.5                                            | 6.1                     | 576                                               | 64                      |
| 14AP59 | Zircon_sample-023.FIN2 | 528                         | 18         | 17       | 3          | 4        | 0          | 33.9              | 0.642                                            | 0.014                   | 0.080                                            | 0.002                   | 0.589            | 0.0571                                            | 0.0009                  | 503.6                                            | 8.6                     | 497.7                                            | 9                       | 496                                               | 34                      |
| 14AP59 | Zircon_Sample-059.FIN2 | 122                         | 6          | 58       | 4          | 12       | 1          | 2.1               | 0.656                                            | 0.011                   | 0.081                                            | 0.001                   | 0.741            | 0.0585                                            | 0.0010                  | 511.8                                            | 6.8                     | 500.9                                            | 5.8                     | 546                                               | 38                      |
| 14AP59 | Zircon_Sample-079.FIN2 | 119                         | 8          | 84       | 19         | 19       | 3          | 1.5               | 0.685                                            | 0.046                   | 0.083                                            | 0.002                   | 0.839            | 0.0600                                            | 0.0035                  | 529                                              | 27                      | 512.8                                            | 9.5                     | 590                                               | 120                     |
| 14AP59 | Zircon_Sample-151.FIN2 | 414                         | 21         | 277      | 5          | 60       | 2          | 1.5               | 0.742                                            | 0.030                   | 0.092                                            | 0.001                   | 0.331            | 0.0585                                            | 0.0022                  | 563                                              | 17                      | 564.5                                            | 6.7                     | 545                                               | 83                      |
| 14AP59 | Zircon_Sample-103.FIN2 | 484                         | 42         | 243      | 16         | 68       | 5          | 1.9               | 0.984                                            | 0.019                   | 0.113                                            | 0.002                   | 0.891            | 0.0624                                            | 0.0010                  | 696                                              | 10                      | 691                                              | 11                      | 688                                               | 33                      |
| 14AP59 | Zircon_Sample-131.FIN2 | 307                         | 23         | 148      | 12         | 40       | 2          | 2.1               | 0.951                                            | 0.026                   | 0.114                                            | 0.003                   | 0.632            | 0.0607                                            | 0.0018                  | 678                                              | 14                      | 693                                              | 19                      | 625                                               | 62                      |
| 14AP59 | Zircon_Sample-153.FIN2 | 62                          | 16         | 51       | 14         | 15       | 4          | 1.2               | 1.108                                            | 0.041                   | 0.125                                            | 0.001                   | 0.269            | 0.0640                                            | 0.0022                  | 756                                              | 20                      | 761.7                                            | 5.8                     | 736                                               | 75                      |
| 14AP59 | Zircon_Sample-060.FIN2 | 180                         | 21         | 101      | 9          | 29       | 3          | 1.8               | 1.139                                            | 0.018                   | 0.128                                            | 0.003                   | 0.658            | 0.0648                                            | 0.0008                  | 772.1                                            | 8.7                     | 777                                              | 14                      | 767                                               | 26                      |
| 14AP59 | Zircon_Sample-179.FIN2 | 150                         | 12         | 187      | 11         | 64       | 3          | 0.8               | 1.237                                            | 0.027                   | 0.139                                            | 0.002                   | 0.480            | 0.0653                                            | 0.0016                  | 817                                              | 12                      | 840                                              | 11                      | 781                                               | 51                      |
| 14AP59 | Zircon_Sample-209.FIN2 | 121                         | 18         | 108      | 21         | 54       | 11         | 1.2               | 2.080                                            | 0.033                   | 0.197                                            | 0.002                   | 0.473            | 0.0778                                            | 0.0013                  | 1142                                             | 11                      | 1159.2                                           | 9.2                     | 1141                                              | 32                      |
| 14AP59 | Zircon_Sample-152.FIN2 | 94                          | 3          | 55       | 2          | 29       | 1          | 1.7               | 2.530                                            | 0.058                   | 0.225                                            | 0.002                   | 0.652            | 0.0817                                            | 0.0017                  | 1281                                             | 17                      | 1306.8                                           | 7.8                     | 1237                                              | 42                      |
| 14AP59 | Zircon_sample-046.FIN2 | 1261                        | 66         | 155      | 12         | 79       | 3          | 8.3               | 3.480                                            | 0.057                   | 0.230                                            | 0.004                   | 0.977            | 0.1091                                            | 0.0006                  | 1522                                             | 13                      | 1332                                             | 22                      | 1784                                              | 9.9                     |
| 14AP59 | Zircon_Sample-104.FIN2 | 130                         | 11         | 54       | 5          | 38       | 2          | 2.4               | 3.430                                            | 0.120                   | 0.230                                            | 0.006                   | 0.911            | 0.1091                                            | 0.0013                  | 1509                                             | 27                      | 1334                                             | 32                      | 1783                                              | 23                      |
| 14AP59 | Zircon_Sample-189.FIN2 | 96                          | 2          | 80       | 2          | 44       | 0          | 1.2               | 2.730                                            | 0.040                   | 0.237                                            | 0.002                   | 0.257            | 0.0840                                            | 0.0012                  | 1336                                             | 11                      | 1373.3                                           | 8.2                     | 1292                                              | 28                      |
| 14AP59 | Zircon_sample-027.FIN2 | 464                         | 21         | 232      | 12         | 141      | 4          | 2.0               | 3.430                                            | 0.060                   | 0.259                                            | 0.003                   | 0.845            | 0.0951                                            | 0.0008                  | 1511                                             | 14                      | 1485                                             | 16                      | 1530                                              | 16                      |
| 14AP59 | Zircon_Sample-111.FIN2 | 95                          | 10         | 50       | 3          | 32       | 2          | 1.8               | 4.570                                            | 0.150                   | 0.291                                            | 0.008                   | 0.971            | 0.1126                                            | 0.0012                  | 1743                                             | 28                      | 1644                                             | 41                      | 1841                                              | 19                      |
| 14AP59 | Zircon_Sample-194.FIN2 | 289                         | 56         | 129      | 10         | 100      | 5          | 2.4               | 4.660                                            | 0.290                   | 0.305                                            | 0.017                   | 0.957            | 0.1110                                            | 0.0013                  | 1755                                             | 53                      | 1715                                             | 84                      | 1816                                              | 22                      |
| 14AP59 | Zircon_Sample-154.FIN2 | 263                         | 25         | 102      | 9          | 70       | 4          | 2.6               | 5.060                                            | 0.160                   | 0.316                                            | 0.011                   | 0.945            | 0.1161                                            | 0.0013                  | 1829                                             | 27                      | 1767                                             | 52                      | 1896                                              | 20                      |
| 14AP59 | Zircon_Sample-140.FIN2 | 162                         | 31         | 165      | 77         | 123      | 43         | 1.3               | 4.450                                            | 0.140                   | 0.318                                            | 0.010                   | 0.957            | 0.1004                                            | 0.0008                  | 1721                                             | 26                      | 1780                                             | 47                      | 1631                                              | 15                      |
| 14AP59 | Zircon_Sample-047.FIN2 | 376                         | 6          | 233      | 15         | 165      | 10         | 1.6               | 4.980                                            | 0.100                   | 0.322                                            | 0.007                   | 0.922            | 0.1123                                            | 0.0010                  | 1816                                             | 18                      | 1800                                             | 34                      | 1836                                              | 16                      |
| 14AP59 | Zircon_Sample-177.FIN2 | 380                         | 8          | 288      | 6          | 216      | 6          | 1.3               | 5.140                                            | 0.071                   | 0.323                                            | 0.005                   | 0.734            | 0.1158                                            | 0.0014                  | 1843                                             | 12                      | 1804                                             | 24                      | 1892                                              | 21                      |
| 14AP59 | Zircon_sample-013.FIN2 | 182                         | 34         | 108      | 33         | 79       | 21         | 1.9               | 5.090                                            | 0.270                   | 0.327                                            | 0.015                   | 0.967            | 0.1141                                            | 0.0012                  | 1833                                             | 46                      | 1824                                             | 72                      | 1866                                              | 19                      |
| 14AP59 | Zircon_sample-022.FIN2 | 91                          | 3          | 70       | 2          | 56       | 1          | 1.3               | 5.247                                            | 0.066                   | 0.332                                            | 0.002                   | 0.138            | 0.1133                                            | 0.0016                  | 1860                                             | 11                      | 1846                                             | 10                      | 1852                                              | 25                      |
| 14AP59 | Zircon_sample-034.FIN2 | 210                         | 6          | 124      | 3          | 97       | 4          | 1.7               | 5.244                                            | 0.052                   | 0.333                                            | 0.003                   | 0.775            | 0                                                 |                         |                                                  |                         |                                                  |                         |                                                   |                         |

|                                  |                        |     |     |     |     |     |    |      |        |       |       |       |       |        |        |        |     |        |     |        |     |
|----------------------------------|------------------------|-----|-----|-----|-----|-----|----|------|--------|-------|-------|-------|-------|--------|--------|--------|-----|--------|-----|--------|-----|
| 14AP59                           | Zircon_Sample-169.FIN2 | 450 | 50  | 56  | 10  | 46  | 10 | 8.3  | 6.634  | 0.086 | 0.383 | 0.006 | 0.863 | 0.1264 | 0.0016 | 2064   | 11  | 2089   | 27  | 2049   | 23  |
| 14AP59                           | Zircon_Sample-130.FIN2 | 172 | 27  | 197 | 26  | 140 | 16 | 0.9  | 7.310  | 0.170 | 0.387 | 0.009 | 0.971 | 0.1358 | 0.0014 | 2150   | 21  | 2107   | 43  | 2174   | 18  |
| 14AP59                           | Zircon_Sample-089.FIN2 | 171 | 23  | 112 | 21  | 91  | 14 | 1.6  | 6.800  | 0.100 | 0.387 | 0.004 | 0.862 | 0.1277 | 0.0012 | 2085   | 13  | 2110   | 19  | 2066   | 17  |
| 14AP59                           | Zircon_Sample-099.FIN2 | 246 | 27  | 152 | 17  | 129 | 10 | 1.6  | 6.675  | 0.099 | 0.391 | 0.006 | 0.920 | 0.1231 | 0.0010 | 2069   | 13  | 2127   | 26  | 2001   | 14  |
| 14AP59                           | Zircon_Sample-115.FIN2 | 343 | 19  | 178 | 22  | 160 | 17 | 1.9  | 6.930  | 0.120 | 0.393 | 0.006 | 0.921 | 0.1256 | 0.0007 | 2102   | 16  | 2138   | 25  | 2038   | 10  |
| 14AP59                           | Zircon_Sample-063.FIN2 | 454 | 60  | 620 | 110 | 525 | 65 | 0.8  | 9.030  | 0.350 | 0.420 | 0.016 | 0.984 | 0.1554 | 0.0011 | 2338   | 35  | 2277   | 69  | 2406   | 12  |
| 14AP59                           | Zircon_Sample-085.FIN2 | 240 | 39  | 263 | 61  | 201 | 22 | 1.0  | 11.010 | 0.650 | 0.446 | 0.025 | 0.990 | 0.1781 | 0.0014 | 2516   | 56  | 2370   | 110 | 2635   | 13  |
| 14AP59                           | Zircon_Sample-182.FIN2 | 624 | 61  | 600 | 110 | 367 | 13 | 1.1  | 10.770 | 0.550 | 0.447 | 0.020 | 0.982 | 0.1758 | 0.0020 | 2499   | 49  | 2380   | 92  | 2613   | 19  |
| 14AP59                           | Zircon_sample-021.FIN2 | 787 | 96  | 307 | 65  | 301 | 68 | 3.0  | 10.840 | 0.240 | 0.453 | 0.004 | 0.585 | 0.1700 | 0.0023 | 2509   | 20  | 2409   | 17  | 2569   | 30  |
| 14AP59                           | Zircon_sample-033.FIN2 | 308 | 22  | 146 | 16  | 147 | 14 | 2.2  | 10.130 | 0.350 | 0.461 | 0.010 | 0.926 | 0.1598 | 0.0021 | 2456   | 26  | 2442   | 45  | 2453   | 22  |
| 14AP59                           | Zircon_sample-024.FIN2 | 280 | 7   | 223 | 11  | 256 | 25 | 1.3  | 11.380 | 0.180 | 0.464 | 0.007 | 0.896 | 0.1750 | 0.0009 | 2555   | 15  | 2458   | 30  | 2606.1 | 8.5 |
| 14AP59                           | Zircon_Sample-192.FIN2 | 213 | 29  | 119 | 34  | 127 | 34 | 1.7  | 11.110 | 0.130 | 0.484 | 0.014 | 0.947 | 0.1655 | 0.0026 | 2533   | 11  | 2544   | 62  | 2512   | 27  |
| 14AP59                           | Zircon_Sample-050.FIN2 | 73  | 12  | 67  | 12  | 73  | 12 | 1.0  | 12.670 | 0.280 | 0.486 | 0.007 | 0.944 | 0.1897 | 0.0016 | 2660   | 19  | 2553   | 31  | 2739   | 14  |
| 14AP59                           | Zircon_sample-036.FIN2 | 648 | 80  | 435 | 82  | 462 | 71 | 1.6  | 11.830 | 0.220 | 0.486 | 0.006 | 0.770 | 0.1759 | 0.0017 | 2590   | 17  | 2554   | 24  | 2615   | 16  |
| 14AP59                           | Zircon_Sample-117.FIN2 | 90  | 6   | 73  | 5   | 75  | 6  | 1.3  | 11.630 | 0.220 | 0.487 | 0.008 | 0.779 | 0.1710 | 0.0019 | 2574   | 18  | 2558   | 35  | 2567   | 18  |
| 14AP59                           | Zircon_Sample-073.FIN2 | 344 | 21  | 276 | 25  | 290 | 18 | 1.2  | 12.070 | 0.120 | 0.488 | 0.003 | 0.551 | 0.1808 | 0.0017 | 2609.5 | 9.1 | 2560   | 14  | 2660   | 15  |
| 14AP59                           | Zircon_sample-035.FIN2 | 244 | 27  | 253 | 65  | 296 | 57 | 1.3  | 12.050 | 0.330 | 0.492 | 0.012 | 0.929 | 0.1748 | 0.0018 | 2607   | 26  | 2578   | 50  | 2604   | 18  |
| 14AP59                           | Zircon_Sample-091.FIN2 | 158 | 29  | 109 | 27  | 118 | 27 | 1.6  | 12.250 | 0.210 | 0.493 | 0.007 | 0.820 | 0.1789 | 0.0021 | 2623   | 16  | 2583   | 30  | 2642   | 19  |
| 14AP59                           | Zircon_sample-007.FIN2 | 443 | 40  | 119 | 25  | 125 | 20 | 4.0  | 12.640 | 0.330 | 0.496 | 0.012 | 0.965 | 0.1875 | 0.0010 | 2658   | 23  | 2596   | 54  | 2720   | 9   |
| 14AP59                           | Zircon_Sample-157.FIN2 | 388 | 15  | 310 | 14  | 334 | 8  | 1.2  | 12.110 | 0.280 | 0.496 | 0.011 | 0.902 | 0.1768 | 0.0014 | 2612   | 22  | 2597   | 46  | 2623   | 13  |
| 14AP59                           | Zircon_Sample-207.FIN2 | 770 | 180 | 176 | 18  | 199 | 15 | 5.1  | 12.220 | 0.140 | 0.501 | 0.007 | 0.757 | 0.1783 | 0.0020 | 2621   | 11  | 2616   | 28  | 2636   | 19  |
| 14AP59                           | Zircon_Sample-166.FIN2 | 595 | 12  | 394 | 22  | 399 | 24 | 1.5  | 13.000 | 0.290 | 0.505 | 0.013 | 0.946 | 0.1853 | 0.0012 | 2679   | 21  | 2635   | 56  | 2701   | 11  |
| 14AP59                           | Zircon_Sample-191.FIN2 | 232 | 26  | 22  | 3   | 26  | 3  | 10.3 | 13.010 | 0.480 | 0.514 | 0.015 | 0.903 | 0.1838 | 0.0029 | 2679   | 35  | 2672   | 63  | 2687   | 26  |
| 14AP59                           | Zircon_Sample-196.FIN2 | 114 | 6   | 98  | 5   | 116 | 5  | 1.2  | 12.940 | 0.100 | 0.522 | 0.004 | 0.428 | 0.1812 | 0.0019 | 2675.3 | 7.4 | 2705   | 17  | 2664   | 18  |
| 14AP59                           | Zircon_Sample-202.FIN2 | 445 | 33  | 175 | 6   | 216 | 13 | 2.6  | 14.090 | 0.160 | 0.533 | 0.004 | 0.905 | 0.1915 | 0.0011 | 2756   | 11  | 2755   | 18  | 2759   | 12  |
| 14AP59                           | Zircon_Sample-165.FIN2 | 201 | 8   | 129 | 5   | 156 | 6  | 1.5  | 14.070 | 0.140 | 0.545 | 0.006 | 0.741 | 0.1862 | 0.0008 | 2754.1 | 9.3 | 2802   | 25  | 2708.5 | 6.8 |
| 14AP59                           | Zircon_Sample-205.FIN2 | 172 | 17  | 139 | 16  | 167 | 17 | 1.3  | 16.000 | 0.440 | 0.549 | 0.009 | 0.862 | 0.2105 | 0.0030 | 2875   | 27  | 2819   | 37  | 2909   | 23  |
| 14AP59                           | Zircon_Sample-204.FIN2 | 92  | 5   | 50  | 4   | 63  | 5  | 1.9  | 14.130 | 0.150 | 0.552 | 0.004 | 0.526 | 0.1848 | 0.0024 | 2758.1 | 9.9 | 2835   | 17  | 2696   | 22  |
| 14AP59                           | Zircon_Sample-075.FIN2 | 90  | 30  | 77  | 28  | 90  | 26 | 1.2  | 13.700 | 0.740 | 0.553 | 0.030 | 0.978 | 0.1803 | 0.0018 | 2726   | 50  | 2840   | 120 | 2656   | 17  |
| 14AP59                           | Zircon_Sample-086.FIN2 | 369 | 38  | 222 | 23  | 259 | 22 | 1.6  | 17.210 | 0.680 | 0.567 | 0.024 | 0.956 | 0.2198 | 0.0028 | 2945   | 39  | 2895   | 99  | 2979   | 20  |
| 14AP59                           | Zircon_Sample-193.FIN2 | 189 | 15  | 168 | 12  | 202 | 9  | 1.1  | 14.900 | 0.200 | 0.567 | 0.006 | 0.907 | 0.1914 | 0.0010 | 2809   | 13  | 2897   | 23  | 2754.4 | 9   |
| 14AP59                           | Zircon_Sample-065.FIN2 | 102 | 3   | 66  | 2   | 79  | 2  | 1.6  | 16.130 | 0.150 | 0.567 | 0.002 | 0.788 | 0.2073 | 0.0016 | 2884.1 | 8.9 | 2897.2 | 9.7 | 2884   | 13  |
| 14AP59                           | Zircon_Sample-125.FIN2 | 247 | 33  | 162 | 19  | 176 | 16 | 1.5  | 19.210 | 0.850 | 0.568 | 0.024 | 0.987 | 0.2435 | 0.0012 | 3051   | 43  | 2900   | 98  | 3143.3 | 7.9 |
| 14AP59                           | Zircon_Sample-167.FIN2 | 268 | 15  | 223 | 11  | 282 | 15 | 1.2  | 14.740 | 0.210 | 0.569 | 0.006 | 0.772 | 0.1863 | 0.0018 | 2798   | 14  | 2902   | 23  | 2710   | 16  |
| 14AP59                           | Zircon_sample-026.FIN2 | 406 | 64  | 190 | 36  | 231 | 34 | 2.2  | 16.590 | 0.500 | 0.571 | 0.017 | 0.977 | 0.2088 | 0.0015 | 2910   | 30  | 2909   | 69  | 2896   | 11  |
| 14AP59                           | Zircon_Sample-114.FIN2 | 89  | 10  | 55  | 10  | 53  | 8  | 1.7  | 17.010 | 0.290 | 0.570 | 0.011 | 0.890 | 0.2133 | 0.0026 | 2935   | 17  | 2909   | 46  | 2930   | 19  |
| 14AP59                           | Zircon_Sample-092.FIN2 | 207 | 16  | 106 | 16  | 128 | 19 | 2.0  | 16.940 | 0.340 | 0.584 | 0.014 | 0.949 | 0.2089 | 0.0012 | 2931   | 19  | 2966   | 55  | 2896.8 | 9.4 |
| 14AP59                           | Zircon_Sample-208.FIN2 | 63  | 1   | 32  | 2   | 40  | 4  | 2.1  | 17.700 | 0.200 | 0.593 | 0.005 | 0.853 | 0.2171 | 0.0023 | 2974   | 11  | 3000   | 22  | 2959   | 17  |
| 14AP59                           | Zircon_Sample-141.FIN2 | 196 | 24  | 174 | 32  | 238 | 33 | 1.1  | 20.630 | 0.170 | 0.638 | 0.006 | 0.879 | 0.2323 | 0.0013 | 3121.1 | 8   | 3180   | 22  | 3067.7 | 8.7 |
| Common-Pb corrected <sup>d</sup> |                        |     |     |     |     |     |    |      |        |       |       |       |       |        |        |        |     |        |     |        |     |
| 14AP59                           | Zircon_Sample-072.FIN2 | 126 | 21  | 97  | 32  | 103 | 28 | 1.5  | 12.160 | 0.960 | 0.512 | 0.044 | 0.989 | 0.1727 | 0.0020 | 2610   | 72  | 2660   | 180 | 2583   | 20  |
| 14AP59                           | Zircon_Sample-129.FIN2 | 419 | 29  | 281 | 70  | 43  | 6  | 1.8  | 0.397  | 0.061 | 0.057 | 0.001 | 0.516 | 0.0499 | 0.0074 | 336    | 45  | 355.6  | 5.1 | 430    | 180 |
| 14AP59                           | Zircon_Sample-156.FIN2 | 782 | 77  | 346 | 52  | 324 | 35 | 2.5  | 11.580 | 0.520 | 0.484 | 0.019 | 0.973 | 0.1719 | 0.0015 | 2583   | 36  | 2545   | 82  | 2576   | 15  |

<sup>a</sup>U, Th and Pb concentrations with errors (2SE) and U/Th ratios are calculated relative to the Harvard 91500 reference zircon

<sup>b</sup>Corrected for background, downhole and within-run Pb/U fractionation. Normalised to the reference zircon Harvard 91500 (TIMS/measured values). The <sup>207</sup>Pb/<sup>235</sup>U is calculated through: (<sup>207</sup>Pb/<sup>206</sup>Pb)/(<sup>238</sup>U/<sup>206</sup>Pb \* 1/137.88)

<sup>c</sup>Rho is the error correlation defined as the quotient of the propagated errors of the <sup>206</sup>Pb/<sup>238</sup>U and <sup>207</sup>Pb/<sup>235</sup>U ratios

<sup>d</sup>Quadratic addition of within-run errors (2 SE) and the all-session reproducibility of Harvard-91500, GJ-1 and Plesovice zircon reference materials (2 SE)

<sup>e</sup>Normalised to the Harvard 91500 reference zircon

<sup>f</sup>Common Pb correction through measured Pb<sup>204</sup> (corrected for Hg<sup>204</sup> using natural abundance Hg isotopic ratios) and the model Pb composition of Stacey & Kramers (1975))

14AP65

|        |                        | CONCENTRATIONS <sup>a</sup> |            |          |            |          |            | RATIOS            |                                                  |                         |                                                  |                         |                                 | AGES                                              |                         |                                                  |                         |                                                  |                         |                                                   |                         |
|--------|------------------------|-----------------------------|------------|----------|------------|----------|------------|-------------------|--------------------------------------------------|-------------------------|--------------------------------------------------|-------------------------|---------------------------------|---------------------------------------------------|-------------------------|--------------------------------------------------|-------------------------|--------------------------------------------------|-------------------------|---------------------------------------------------|-------------------------|
| Sample | Analysis               | U [ppm]                     | 2 $\sigma$ | Th [ppm] | 2 $\sigma$ | Pb [ppm] | 2 $\sigma$ | U/Th <sup>a</sup> | <sup>207</sup> Pb/ <sup>235</sup> U <sup>b</sup> | 2 $\sigma$ <sup>d</sup> | <sup>206</sup> Pb/ <sup>238</sup> U <sup>b</sup> | 2 $\sigma$ <sup>d</sup> | $\rho_{\text{ho}}$ <sup>c</sup> | <sup>207</sup> Pb/ <sup>206</sup> Pb <sup>e</sup> | 2 $\sigma$ <sup>d</sup> | <sup>207</sup> Pb/ <sup>235</sup> U <sup>b</sup> | 2 $\sigma$ <sup>d</sup> | <sup>206</sup> Pb/ <sup>238</sup> U <sup>b</sup> | 2 $\sigma$ <sup>d</sup> | <sup>207</sup> Pb/ <sup>206</sup> Pb <sup>e</sup> | 2 $\sigma$ <sup>d</sup> |
| 14AP65 | Zircon_Sample-105.FIN2 | 307                         | 24         | 495      | 20         | 21       | 2          | 0.6               | 0.094                                            | 0.010                   | 0.014                                            | 0.000                   | 0.969                           | 0.0481                                            | 0.0043                  | 91                                               | 8.8                     | 91.4                                             | 1.4                     | 100                                               | 180                     |
| 14AP65 | Zircon_Sample-196.FIN2 | 537                         | 27         | 218      | 5          | 10       | 0          | 2.4               | 0.099                                            | 0.005                   | 0.015                                            | 0.000                   | 0.027                           | 0.0485                                            | 0.0024                  | 96.1                                             | 4.3                     | 95.3                                             | 1.1                     | 120                                               | 110                     |
| 14AP65 | Zircon_Sample-151.FIN2 | 398                         | 26         | 134      | 12         | 7        | 1          | 3.1               | 0.118                                            | 0.004                   | 0.018                                            | 0.000                   | 0.144                           | 0.0476                                            | 0.0021                  | 112.9                                            | 3.9                     | 116.9                                            | 1.6                     | 83                                                | 93                      |
| 14AP65 | Zircon_Sample-087.FIN2 | 696                         | 63         | 379      | 36         | 24       | 2          | 1.8               | 0.133                                            | 0.005                   | 0.020                                            | 0.000                   | 0.011                           | 0.0492                                            | 0.0018                  | 127                                              | 4.7                     | 125.5                                            | 1.4                     | 153                                               | 77                      |
| 14AP65 | Zircon_Sample-090.FIN2 | 630                         | 64         | 113      | 6          | 8        | 0          | 5.8               | 0.146                                            | 0.006                   | 0.021                                            | 0.000                   | 0.165                           | 0.0496                                            | 0.0020                  | 138                                              | 5.1                     | 136.1                                            | 1.2                     | 169                                               | 89                      |
| 14AP65 | Zircon_Sample-194.FIN2 | 351                         | 14         | 330      | 16         | 20       | 1          | 1.0               | 0.155                                            | 0.005                   | 0.022                                            | 0.000                   | 0.647                           | 0.0518                                            | 0.0016                  | 146.5                                            | 4.7                     | 137.5                                            | 2                       | 271                                               | 69                      |
| 14AP65 | Zircon_Sample-061.FIN2 | 915                         | 91         | 946      | 83         | 56       | 5          | 1.1               | 0.147                                            | 0.004                   | 0.022                                            | 0.000                   | 0.311                           | 0.0488                                            | 0.0012                  | 139.4                                            | 3.5                     | 140.6                                            | 2.3                     | 135                                               | 54                      |
| 14AP65 | Zircon_sample-027.FIN2 | 752                         | 44         | 354      | 15         | 20       | 1          | 2.1               | 0.155                                            | 0.005                   | 0.022                                            | 0.000                   | 0.646                           | 0.0507                                            | 0.0012                  | 146                                              | 4                       | 142.9                                            | 1.5                     | 225                                               | 54                      |
| 14AP65 | Zircon_Sample-065.FIN2 | 603                         | 50         | 198      | 18         | 14       | 1          | 3.1               | 0.163                                            | 0.006                   | 0.023                                            | 0.000                   | 0.671                           | 0.0521                                            | 0.0019                  | 153                                              | 5.1                     | 144.4                                            | 2                       | 282                                               | 81                      |
| 14AP65 | Zircon_sample-023.FIN2 | 381                         | 53         | 77       | 13         | 5        | 1          | 4.9               | 0.159                                            | 0.006                   | 0.023                                            | 0.000                   | 0.310                           | 0.0515                                            | 0.0017                  | 150.2                                            | 5.1                     | 144.9                                            | 2.6                     | 256                                               | 78                      |
| 14AP65 | Zircon_Sample-078.FIN2 | 280                         | 6          | 106      | 7          | 7        | 0          | 2.8               | 0.156                                            | 0.007                   | 0.023                                            | 0.000                   | 0.283                           | 0.0495                                            | 0.0022                  | 147                                              | 6.3                     | 145.3                                            | 1.7                     | 166                                               | 96                      |
| 14AP65 | Zircon_Sample-150.FIN2 | 453                         | 24         | 131      | 7          | 9        | 0          | 3.5               | 0.156                                            | 0.004                   | 0.023                                            | 0.000                   | 0.193                           | 0.0487                                            | 0.0013                  | 146.9                                            | 3.5                     | 147.9                                            | 1.6                     | 133                                               | 59                      |
| 14AP65 | Zircon_sample-040.FIN2 | 355                         | 23         | 143      | 9          | 10       | 1          | 2.5               | 0.160                                            | 0.007                   | 0.024                                            | 0.000                   | 0.447                           | 0.0491                                            | 0.0017                  | 150.5                                            | 6                       | 152                                              | 2.1                     | 129                                               | 85                      |
| 14AP65 | Zircon_Sample-114.FIN2 | 337                         | 14         | 131      | 2          | 9        | 0          | 2.6               | 0.167                                            | 0.010                   | 0.024                                            | 0.000                   | 0.175                           | 0.0509                                            | 0.0033                  | 156.3                                            | 8.6                     | 152.6                                            | 2.2                     | 220                                               | 140                     |
| 14AP65 | Zircon_Sample-164.FIN2 | 1182                        | 36         | 220      | 13         | 16       | 1          | 5.4               | 0.169                                            | 0.002                   | 0.025                                            | 0.000                   | 0.058                           | 0.0498                                            | 0.0008                  | 158.3                                            | 2                       | 156.3                                            | 1.7                     | 184                                               | 37                      |
| 14AP65 | Zircon_Sample-131.FIN2 | 391                         | 12         | 98       | 5          | 7        | 0          | 4.0               | 0.167                                            | 0.005                   | 0.025                                            | 0.000                   | 0.161                           | 0.0476                                            | 0.0012                  | 157                                              | 4.3                     | 160.4                                            | 1.9                     | 83                                                | 55                      |
| 14AP65 | Zircon_Sample-104.FIN2 | 590                         | 87         | 174      | 16         | 13       | 1          | 3.4               | 0.172                                            | 0.006                   | 0.025                                            | 0.001                   | 0.635                           | 0.0494                                            | 0.0014                  | 160.8                                            | 5.6                     | 162.2                                            | 3.8                     | 161                                               | 66                      |
| 14AP65 | Zircon_Sample-166.FIN2 | 97                          | 3          | 92       | 7          | 8        | 1          | 1.1               | 0.252                                            | 0.034                   | 0.026                                            | 0.000                   | 0.589                           | 0.0693                                            | 0.0085                  | 227                                              | 27                      | 167.1                                            | 3.1                     | 830                                               | 250                     |
| 14AP65 | Zircon_sample-038.FIN2 | 37                          | 7          | 30       | 7          | 2        | 0          | 1.3               | 0.199                                            | 0.025                   | 0.028                                            | 0.001                   | 0.370                           | 0.0501                                            | 0.0058                  | 183                                              | 21                      | 179.2                                            | 5.7                     | 190                                               | 240                     |
| 14AP65 | Zircon_Sample-170.FIN2 | 227                         | 8          | 124      | 10         | 10       | 1          | 1.9               | 0.198                                            | 0.009                   | 0.029                                            | 0.000                   | 0.409                           | 0.0503                                            | 0.0022                  | 182.9                                            | 7.1                     | 181.7                                            | 1.6                     | 202                                               | 97                      |
| 14AP65 | Zircon_sample-009.FIN2 | 339                         | 32         | 319      | 31         | 27       | 2          | 1.1               | 0.201                                            | 0.006                   | 0.029                                            | 0.001                   | 0.517                           | 0.0502                                            | 0.0013                  | 186.3                                            | 5.1                     | 186                                              | 3.1                     | 201                                               | 62                      |
| 14AP65 | Zircon_Sample-051.FIN2 | 117                         | 7          | 141      | 5          | 13       | 0          | 0.9               | 0.213                                            | 0.017                   | 0.031                                            | 0.000                   | 0.072                           | 0.0492                                            | 0.0041                  | 195                                              | 14                      | 197.3                                            | 2.7                     | 150                                               | 170                     |
| 14AP65 | Zircon_Sample-077.FIN2 | 1052                        | 70         | 403      | 50         | 36       | 4          | 2.8               | 0.236                                            | 0.006                   | 0.033                                            | 0.000                   | 0.182                           | 0.0509                                            | 0.0014                  | 215.3                                            | 4.9                     | 212.1                                            | 1.9                     | 255                                               | 70                      |
| 14AP65 | Zircon_Sample-118.FIN2 | 356                         | 25         | 116      | 4          | 16       | 1          | 3.2               | 0.236                                            | 0.007                   | 0.034                                            | 0.000                   | 0.326                           | 0.0511                                            | 0.0013                  | 215.3                                            | 5.6                     | 214.3                                            | 2.1                     | 243                                               | 57                      |
| 14AP65 | Zircon_Sample-137.FIN2 | 106                         | 6          | 158      | 24         | 16       | 3          | 0.7               | 0.249                                            | 0.013                   | 0.035                                            | 0.000                   | 0.120                           | 0.0509                                            | 0.0029                  | 225                                              | 10                      | 222.9                                            | 2.9                     | 230                                               | 130                     |
| 14AP65 | Zircon_Sample-195.FIN2 | 212                         | 14         | 305      | 18         | 32       | 2          | 0.7               | 0.259                                            | 0.014                   | 0.035                                            | 0.000                   | 0.273                           | 0.0529                                            | 0.0028                  | 234                                              | 11                      | 223.8                                            | 2.4                     | 310                                               | 110                     |
| 14AP65 | Zircon_Sample-169.FIN2 | 94                          | 6          | 134      | 14         | 15       | 2          | 0.7               | 0.258                                            | 0.016                   | 0.037                                            | 0.000                   | 0.595                           | 0.0501                                            | 0.0028                  | 232                                              | 13                      | 235.1                                            | 3                       | 220                                               | 130                     |
| 14AP65 | Zircon_Sample-167.FIN2 | 623                         | 34         | 213      | 7          | 28       | 1          | 3.0               | 0.304                                            | 0.010                   | 0.039                                            | 0.001                   | 0.756                           | 0.0560                                            | 0.0012                  | 269.4                                            | 7.6                     | 245.3                                            | 3.8                     | 470                                               | 57                      |
| 14AP65 | Zircon_sample-022.FIN2 | 297                         | 15         | 344      | 37         | 31       | 3          | 0.9               | 0.288                                            | 0.022                   | 0.039                                            | 0.001                   | 0.676                           | 0.0542                                            | 0.0038                  | 256                                              | 17                      | 247.5                                            | 6.1                     | 370                                               | 150                     |
| 14AP65 | Zircon_sample-035.FIN2 | 82                          | 5          | 82       | 4          | 9        | 1          | 1.0               | 0.279                                            | 0.016                   | 0.040                                            | 0.001                   | 0.350                           | 0.0516                                            | 0.0028                  | 250                                              | 13                      | 251.1                                            | 4.4                     | 250                                               | 120                     |
| 14AP65 | Zircon_Sample-139.FIN2 | 75                          | 4          | 36       | 5          | 4        | 0          | 2.2               | 0.289                                            | 0.027                   | 0.040                                            | 0.001                   | 0.290                           | 0.0528                                            | 0.0048                  | 257                                              | 21                      | 251.6                                            | 3.1                     | 300                                               | 190                     |
| 14AP65 | Zircon_Sample-086.FIN2 | 159                         | 10         | 160      | 8          | 20       | 1          | 1.0               | 0.290                                            | 0.012                   | 0.040                                            | 0.001                   | 0.048                           | 0.0528                                            | 0.0029                  | 258.5                                            | 9.1                     | 255.2                                            | 3.3                     | 310                                               | 120                     |
| 14AP65 | Zircon_Sample-209.FIN2 | 375                         | 31         | 469      | 50         | 53       | 5          | 0.8               | 0.301                                            | 0.010                   | 0.041                                            | 0.001                   | 0.238                           | 0.0521                                            | 0.0015                  | 266.9                                            | 7.9                     | 261.6                                            | 3.1                     | 287                                               | 63                      |
| 14AP65 | Zircon_Sample-064.FIN2 | 260                         | 21         | 222      | 11         | 26       | 1          | 1.2               | 0.287                                            | 0.010                   | 0.042                                            | 0.001                   | 0.418                           | 0.0499                                            | 0.0016                  | 255.8                                            | 8.2                     | 264.3                                            | 3.4                     | 185                                               | 75                      |
| 14AP65 | Zircon_Sample-154.FIN2 | 227                         | 24         | 241      | 27         | 28       | 3          | 1.0               | 0.300                                            | 0.010                   | 0.042                                            | 0.001                   | 0.308                           | 0.0513                                            | 0.0018                  | 266.2                                            | 7.9                     | 267.5                                            | 4.2                     | 247                                               | 82                      |
| 14AP65 | Zircon_Sample-183.FIN2 | 586                         | 61         | 357      | 61         | 46       | 7          | 1.8               | 0.311                                            | 0.007                   | 0.043                                            | 0.000                   | 0.482                           | 0.0526                                            | 0.0011                  | 275.2                                            | 5.4                     | 268.7                                            | 3                       | 308                                               | 46                      |
| 14AP65 | Zircon_Sample-156.FIN2 | 343                         | 24         | 222      | 33         | 26       | 3          | 1.6               | 0.328                                            | 0.013                   | 0.044                                            | 0.000                   | 0.568                           | 0.0539                                            | 0.0020                  | 288                                              | 10                      | 277.1                                            | 2.7                     | 362                                               | 81                      |
| 14AP65 | Zircon_Sample-182.FIN2 | 347                         | 31         | 520      | 40         | 64       | 5          | 0.7               | 0.316                                            | 0.009                   | 0.044                                            | 0.001                   | 0.192                           | 0.0521                                            | 0.0017                  | 278.7                                            | 6.9                     | 277.9                                            | 3.2                     | 284                                               | 76                      |
| 14AP65 | Zircon_Sample-163.FIN2 | 572                         | 45         | 223      | 26         | 54       | 3          | 1.3               | 0.321                                            | 0.010                   | 0.044                                            | 0.000                   | 0.452                           | 0.0525                                            | 0.0014                  | 282.3                                            | 7.6                     | 279.1                                            | 2.5                     | 301                                               | 59                      |
| 14AP65 | Zircon_Sample-168.FIN2 | 446                         | 55         | 698      | 72         | 90       | 10         | 0.6               | 0.319                                            | 0.013                   | 0.044                                            | 0.000                   | 0.668                           | 0.0515                                            | 0.0016                  | 280.9                                            | 9.8                     | 279.7                                            | 2.9                     | 260                                               | 75                      |
| 14AP65 | Zircon_Sample-128.FIN2 | 464                         | 30         | 576      | 39         | 63       | 3          | 0.8               | 0.383                                            | 0.027                   | 0.045                                            | 0.001                   | 0.700                           | 0.0621                                            | 0.0040                  | 329                                              | 20                      | 282.6                                            | 3.6                     | 730                                               | 180                     |
| 14AP65 | Zircon_Sample-085.FIN2 | 247                         | 17         | 124      | 12         | 17       | 1          | 2.0               | 0.313                                            | 0.008                   | 0.045                                            | 0.001                   | 0.078                           | 0.0508                                            | 0.0015                  | 276.3                                            | 6                       | 283.1                                            | 5                       | 229                                               | 68                      |
| 14AP65 | Zircon_Sample-129.FIN2 | 205                         | 14         | 180      | 10         | 22       | 1          | 1.1               | 0.320                                            | 0.012                   | 0.045                                            | 0.000                   | 0.406                           | 0.0515                                            | 0.0015                  | 282                                              | 9.3                     | 285.8                                            | 2.7                     | 257                                               | 67                      |
| 14AP65 | Zircon_Sample-178.FIN2 | 305                         | 16         | 489      | 84         | 59       | 9          | 0.7               | 0.333                                            | 0.014                   | 0.046                                            | 0.001                   | 0.535                           | 0.0523                                            | 0.0018                  | 292                                              | 11                      | 288.2                                            | 4.7                     | 292                                               | 81                      |
| 14AP65 | Zircon_Sample-138.FIN2 | 403                         | 33         | 173      | 27         | 25       | 4          | 2.4               | 0.342                                            | 0.009                   | 0.046                                            | 0.000                   | 0.178                           | 0.0530                                            | 0.0016                  | 298.3                                            | 6.8                     | 290.4                                            | 2.7                     | 321                                               | 70                      |
| 14AP65 | Zircon_Sample-059.FIN2 | 655                         | 96         | 32       | 21         | 4        | 2          | 25.0              | 0.332                                            | 0.010                   | 0.047                                            | 0.001                   | 0.475                           | 0.0516                                            | 0.0014                  | 291.1                                            | 7.7                     | 294.4                                            | 5.1                     | 266                                               | 63                      |
| 14AP65 | Zircon_Sample-060.FIN2 | 228                         | 55         | 323      | 87         | 42       | 10         | 0.7               | 0.340                                            | 0.018                   | 0.047                                            | 0.001                   | 0.631                           | 0.0523                                            | 0.0022                  | 297                                              | 13                      | 296.8                                            | 6.8                     | 292                                               | 97                      |
| 14AP65 | Zircon_Sample-074.FIN2 | 235                         | 10         | 193      | 13         | 25       | 1          | 1.3               | 0.376                                            | 0.010                   | 0.048                                            | 0.001                   | 0.745                           | 0.0572                                            | 0.0012                  | 323.9                                            | 7.6                     | 299.6                                            | 4.4                     | 498                                               | 45                      |
| 14AP65 | Zircon_Sample-141.FIN2 | 665                         | 58         | 349      | 25         | 49       | 3          | 1.9               | 0.342                                            | 0.007                   | 0.048                                            | 0.001                   | 0.395                           | 0.0519                                            | 0.0009                  | 298.5                                            | 5.6                     | 299.8                                            | 4.6                     | 277                                               | 39                      |
| 14AP65 | Zircon_sample-037.FIN2 | 160                         | 8          | 116      | 8          | 16       | 1          | 1.3               | 0.344                                            | 0.012                   | 0.049                                            | 0.001                   | 0.512                           | 0.0514                                            | 0.0019                  | 300.1                                            | 9.4                     | 306.2                                            | 3.3                     | 254                                               | 83                      |
| 14AP65 | Zircon_sample-039.FIN2 | 207                         | 9          | 181      | 8          | 27       | 1          | 1.1               | 0.357                                            | 0.013                   | 0.049                                            | 0.001                   | 0.344                           | 0.0526                                            | 0.0019                  | 309.8                                            | 9.5                     | 307.8                                            | 4                       | 305                                               | 83                      |
| 14AP65 | Zircon_Sample-072.FIN2 | 150                         | 9          | 153      | 14         | 24       | 3          | 1.0               | 0.429                                            | 0.017                   | 0.058                                            | 0.001                   | 0.062                           | 0.0533                                            | 0.0021                  | 362                                              | 12                      | 363.3                                            | 4.5                     | 334                                               | 90                      |
| 14AP65 | Zircon_Sample-124.FIN2 | 132                         | 4          | 91       | 8          | 14       | 1          | 1.5               | 0.437                                            | 0.014                   | 0.058                                            | 0.001                   | 0.017                           | 0.0543                                            | 0.0019                  | 368.3                                            | 9.8                     | 365.8                                            | 3.9                     | 376                                               | 76                      |
| 14AP65 | Zircon_Sample-048.FIN2 | 457                         | 40         | 58       | 4          | 10       | 1          | 8.3               | 0.449                                            | 0.011                   | 0.059                                            | 0.001                   | 0.411                           | 0.0539                                            | 0.0013                  | 376.5                                            | 7.6                     | 372                                              | 5.7                     | 363                                               | 53                      |
| 14AP65 | Zircon_Sample-050.FIN2 | 191                         | 14         | 102      | 6          | 18       | 1          | 1.9               | 0.450                                            | 0.016                   | 0.060                                            | 0.001                   | 0.573                           | 0.0541                                            | 0.0015                  | 377                                              | 11                      | 373.6                                            | 4.7                     | 371                                               | 62                      |
| 14AP65 | Zircon_sample-020.FIN2 | 129                         | 15         | 72       | 7          | 11       | 1          | 1.8               | 0.465                                            | 0.019                   | 0.061                                            | 0.001                   | 0.536                           | 0.0562                                            | 0.0021                  | 387                                              | 13                      | 378.9                                            | 4.8                     | 452                                               | 84                      |
| 14AP65 | Zircon_Sample-066.FIN2 | 275                         | 33         | 66       | 10         | 12       | 2          | 4.4               | 0.454                                            | 0.014                   | 0.062                                            | 0.001                   | 0.015                           | 0.0531                                            | 0.0018                  | 380.2                                            | 9.4                     | 386.2                                            | 4.7                     | 327                                               | 79                      |
| 14AP65 | Zircon_sample-025.FIN2 | 287                         | 9          | 302      | 12         | 47       | 2          | 1.0               | 0.505                                            | 0.011                   | 0.068                                            | 0.001                   | 0.619                           | 0.0549                                            | 0.0009                  | 414.8                                            | 7.6                     | 421.3                                            | 5                       | 415                                               | 42                      |
| 14AP65 | Zircon_Sample-063.FIN2 | 136                         | 6          | 90       | 4          | 17       | 1          | 1.6               | 0.516                                            | 0.013                   | 0.069                                            |                         |                                 |                                                   |                         |                                                  |                         |                                                  |                         |                                                   |                         |



|                                  |                        |      |     |     |     |     |    |      |        |       |       |       |       |        |        |        |     |       |     |      |     |
|----------------------------------|------------------------|------|-----|-----|-----|-----|----|------|--------|-------|-------|-------|-------|--------|--------|--------|-----|-------|-----|------|-----|
| 14AP65                           | Zircon_Sample-103.FIN2 | 430  | 75  | 590 | 130 | 152 | 33 | 0.8  | 0.781  | 0.023 | 0.094 | 0.002 | 0.531 | 0.0602 | 0.0012 | 586    | 13  | 581   | 11  | 608  | 44  |
| 14AP65                           | Zircon_sample-024.FIN2 | 248  | 9   | 259 | 17  | 72  | 4  | 1.0  | 0.995  | 0.019 | 0.115 | 0.001 | 0.368 | 0.0631 | 0.0012 | 700.9  | 9.5 | 702   | 8.2 | 709  | 39  |
| 14AP65                           | Zircon_Sample-091.FIN2 | 330  | 11  | 258 | 16  | 98  | 6  | 1.3  | 1.087  | 0.023 | 0.123 | 0.001 | 0.346 | 0.0646 | 0.0013 | 747    | 11  | 747.8 | 5.3 | 759  | 43  |
| 14AP65                           | Zircon_Sample-127.FIN2 | 73   | 2   | 45  | 2   | 15  | 1  | 1.7  | 1.166  | 0.030 | 0.130 | 0.002 | 0.336 | 0.0645 | 0.0015 | 784    | 14  | 787.3 | 9.2 | 785  | 46  |
| 14AP65                           | Zircon_Sample-092.FIN2 | 76   | 4   | 56  | 2   | 22  | 1  | 1.4  | 1.169  | 0.023 | 0.131 | 0.002 | 0.230 | 0.0648 | 0.0012 | 786    | 11  | 790.7 | 8.4 | 767  | 38  |
| 14AP65                           | Zircon_Sample-100.FIN2 | 48   | 3   | 34  | 2   | 11  | 1  | 1.4  | 1.163  | 0.036 | 0.133 | 0.002 | 0.017 | 0.0640 | 0.0023 | 783    | 17  | 807   | 11  | 755  | 69  |
| 14AP65                           | Zircon_Sample-111.FIN2 | 269  | 23  | 465 | 49  | 165 | 15 | 0.6  | 1.201  | 0.017 | 0.134 | 0.001 | 0.377 | 0.0658 | 0.0016 | 801    | 7.8 | 809.3 | 4.8 | 800  | 52  |
| 14AP65                           | Zircon_Sample-075.FIN2 | 18   | 2   | 13  | 1   | 5   | 0  | 1.4  | 1.253  | 0.079 | 0.137 | 0.003 | 0.456 | 0.0677 | 0.0034 | 822    | 36  | 828   | 16  | 850  | 100 |
| 14AP65                           | Zircon_sample-010.FIN2 | 500  | 100 | 171 | 4   | 123 | 3  | 3.0  | 4.085  | 0.081 | 0.273 | 0.005 | 0.907 | 0.1094 | 0.0008 | 1651   | 16  | 1555  | 27  | 1790 | 12  |
| 14AP65                           | Zircon_Sample-205.FIN2 | 116  | 8   | 107 | 12  | 100 | 13 | 1.1  | 6.050  | 0.340 | 0.300 | 0.015 | 0.965 | 0.1459 | 0.0023 | 1979   | 50  | 1692  | 72  | 2298 | 27  |
| 14AP65                           | Zircon_sample-021.FIN2 | 1170 | 260 | 110 | 31  | 85  | 22 | 22.1 | 4.740  | 0.510 | 0.304 | 0.030 | 0.997 | 0.1147 | 0.0013 | 1753   | 97  | 1710  | 150 | 1874 | 21  |
| 14AP65                           | Zircon_Sample-176.FIN2 | 252  | 25  | 98  | 4   | 72  | 2  | 2.6  | 4.798  | 0.081 | 0.308 | 0.004 | 0.905 | 0.1127 | 0.0008 | 1784   | 14  | 1730  | 21  | 1843 | 13  |
| 14AP65                           | Zircon_sample-036.FIN2 | 483  | 26  | 257 | 52  | 218 | 42 | 2.2  | 4.729  | 0.077 | 0.310 | 0.004 | 0.804 | 0.1113 | 0.0010 | 1772   | 14  | 1742  | 21  | 1820 | 17  |
| 14AP65                           | Zircon_Sample-062.FIN2 | 161  | 13  | 140 | 8   | 112 | 6  | 1.2  | 4.908  | 0.078 | 0.319 | 0.005 | 0.888 | 0.1121 | 0.0009 | 1803   | 13  | 1786  | 22  | 1834 | 15  |
| 14AP65                           | Zircon_sample-013.FIN2 | 126  | 9   | 63  | 4   | 52  | 3  | 2.0  | 5.030  | 0.094 | 0.321 | 0.006 | 0.849 | 0.1148 | 0.0012 | 1824   | 16  | 1796  | 29  | 1876 | 18  |
| 14AP65                           | Zircon_Sample-047.FIN2 | 98   | 10  | 50  | 4   | 43  | 3  | 2.1  | 5.130  | 0.110 | 0.324 | 0.011 | 0.979 | 0.1120 | 0.0014 | 1841   | 19  | 1807  | 54  | 1832 | 22  |
| 14AP65                           | Zircon_Sample-177.FIN2 | 67   | 2   | 54  | 1   | 45  | 1  | 1.2  | 5.070  | 0.069 | 0.324 | 0.004 | 0.071 | 0.1129 | 0.0020 | 1831   | 11  | 1808  | 18  | 1845 | 32  |
| 14AP65                           | Zircon_Sample-053.FIN2 | 954  | 86  | 515 | 66  | 520 | 70 | 1.9  | 5.367  | 0.092 | 0.328 | 0.003 | 0.779 | 0.1183 | 0.0015 | 1879   | 15  | 1830  | 16  | 1930 | 22  |
| 14AP65                           | Zircon_Sample-142.FIN2 | 148  | 7   | 121 | 5   | 103 | 3  | 1.2  | 5.165  | 0.070 | 0.329 | 0.006 | 0.483 | 0.1156 | 0.0017 | 1847   | 12  | 1832  | 28  | 1888 | 26  |
| 14AP65                           | Zircon_Sample-079.FIN2 | 103  | 6   | 53  | 2   | 42  | 1  | 2.0  | 5.246  | 0.098 | 0.333 | 0.004 | 0.842 | 0.1140 | 0.0013 | 1860   | 16  | 1860  | 22  | 1863 | 20  |
| 14AP65                           | Zircon_Sample-193.FIN2 | 337  | 37  | 439 | 73  | 348 | 58 | 0.8  | 5.204  | 0.051 | 0.335 | 0.004 | 0.710 | 0.1124 | 0.0008 | 1853.2 | 8.4 | 1861  | 17  | 1842 | 14  |
| 14AP65                           | Zircon_Sample-144.FIN2 | 107  | 12  | 268 | 22  | 233 | 17 | 0.4  | 5.650  | 0.110 | 0.345 | 0.006 | 0.683 | 0.1193 | 0.0011 | 1923   | 16  | 1911  | 27  | 1945 | 16  |
| 14AP65                           | Zircon_Sample-203.FIN2 | 166  | 16  | 97  | 6   | 70  | 4  | 1.7  | 5.880  | 0.093 | 0.346 | 0.006 | 0.949 | 0.1231 | 0.0009 | 1958   | 14  | 1913  | 31  | 2001 | 13  |
| 14AP65                           | Zircon_sample-033.FIN2 | 99   | 5   | 60  | 4   | 54  | 3  | 1.7  | 5.560  | 0.110 | 0.357 | 0.006 | 0.892 | 0.1138 | 0.0008 | 1909   | 17  | 1967  | 27  | 1861 | 13  |
| 14AP65                           | Zircon_Sample-089.FIN2 | 95   | 5   | 89  | 2   | 89  | 2  | 1.1  | 7.590  | 0.200 | 0.364 | 0.009 | 0.882 | 0.1512 | 0.0013 | 2184   | 23  | 1999  | 42  | 2360 | 14  |
| 14AP65                           | Zircon_Sample-126.FIN2 | 155  | 13  | 87  | 6   | 78  | 5  | 1.8  | 6.280  | 0.100 | 0.368 | 0.004 | 0.544 | 0.1232 | 0.0015 | 2015   | 14  | 2019  | 20  | 2003 | 22  |
| 14AP65                           | Zircon_Sample-098.FIN2 | 214  | 13  | 119 | 5   | 117 | 6  | 1.8  | 6.890  | 0.100 | 0.390 | 0.005 | 0.536 | 0.1307 | 0.0015 | 2097   | 13  | 2122  | 21  | 2113 | 23  |
| 14AP65                           | Zircon_Sample-101.FIN2 | 803  | 24  | 281 | 21  | 257 | 20 | 2.9  | 7.820  | 0.190 | 0.395 | 0.011 | 0.922 | 0.1452 | 0.0013 | 2210   | 22  | 2147  | 52  | 2290 | 15  |
| 14AP65                           | Zircon_Sample-115.FIN2 | 420  | 20  | 174 | 16  | 166 | 10 | 2.4  | 10.190 | 0.220 | 0.420 | 0.008 | 0.975 | 0.1766 | 0.0014 | 2452   | 20  | 2260  | 37  | 2621 | 13  |
| 14AP65                           | Zircon_Sample-052.FIN2 | 1237 | 77  | 112 | 6   | 137 | 5  | 11.2 | 11.322 | 0.081 | 0.454 | 0.007 | 0.711 | 0.1811 | 0.0024 | 2549.9 | 6.7 | 2412  | 29  | 2663 | 22  |
| 14AP65                           | Zircon_sample-008.FIN2 | 437  | 76  | 67  | 6   | 79  | 9  | 6.8  | 11.990 | 0.510 | 0.457 | 0.025 | 0.955 | 0.1953 | 0.0028 | 2614   | 45  | 2420  | 110 | 2787 | 23  |
| 14AP65                           | Zircon_sample-011.FIN2 | 392  | 16  | 196 | 15  | 248 | 19 | 2.1  | 11.640 | 0.140 | 0.466 | 0.007 | 0.809 | 0.1828 | 0.0016 | 2576   | 12  | 2467  | 32  | 2678 | 15  |
| 14AP65                           | Zircon_Sample-049.FIN2 | 379  | 76  | 226 | 62  | 287 | 75 | 2.0  | 13.660 | 0.330 | 0.501 | 0.012 | 0.927 | 0.1975 | 0.0021 | 2725   | 23  | 2618  | 53  | 2805 | 18  |
| 14AP65                           | Zircon_Sample-155.FIN2 | 351  | 11  | 248 | 6   | 294 | 6  | 1.5  | 13.028 | 0.079 | 0.508 | 0.004 | 0.822 | 0.1862 | 0.0016 | 2681.7 | 5.7 | 2649  | 18  | 2709 | 14  |
| 14AP65                           | Zircon_Sample-189.FIN2 | 72   | 5   | 48  | 2   | 59  | 2  | 1.5  | 13.580 | 0.190 | 0.536 | 0.009 | 0.906 | 0.1832 | 0.0016 | 2724   | 14  | 2768  | 39  | 2682 | 14  |
| Common-Pb corrected <sup>d</sup> |                        |      |     |     |     |     |    |      |        |       |       |       |       |        |        |        |     |       |     |      |     |
| 14AP65                           | Zircon_sample-007.FIN2 | 364  | 25  | 291 | 30  | 199 | 10 | 1.3  | 4.150  | 0.320 | 0.248 | 0.017 | 0.962 | 0.1202 | 0.0017 | 1656   | 64  | 1428  | 89  | 1959 | 26  |
| 14AP65                           | Zircon_sample-012.FIN2 | 553  | 85  | 550 | 200 | 420 | 98 | 1.1  | 4.390  | 0.230 | 0.300 | 0.014 | 0.983 | 0.1073 | 0.0011 | 1708   | 44  | 1691  | 70  | 1754 | 18  |
| 14AP65                           | Zircon_sample-046.FIN2 | 360  | 28  | 640 | 100 | 90  | 15 | 0.6  | 0.348  | 0.060 | 0.045 | 0.001 | 0.717 | 0.0544 | 0.0086 | 299    | 45  | 283.8 | 6.8 | 730  | 240 |
| 14AP65                           | Zircon_Sample-204.FIN2 | 1340 | 150 | 698 | 99  | 95  | 18 | 2.0  | 0.335  | 0.010 | 0.049 | 0.000 | 0.307 | 0.0497 | 0.0014 | 293.4  | 7.5 | 306   | 2.7 | 238  | 50  |

<sup>a</sup>U, Th and Pb concentrations with errors (2SE) and U/Th ratios are calculated relative to the Harvard 91500 reference zircon

<sup>b</sup>Corrected for background, downhole and within-run Pb/U fractionation. Normalised to the reference zircon Harvard 91500 (TIMS/measured values). The <sup>207</sup>Pb/<sup>235</sup>U is calculated through: (<sup>207</sup>Pb/<sup>206</sup>Pb)/(<sup>238</sup>U/<sup>206</sup>Pb \* 1/137.88)

<sup>c</sup>Rho is the error correlation defined as the quotient of the propagated errors of the <sup>206</sup>Pb/<sup>238</sup>U and <sup>207</sup>/<sup>235</sup>U ratios

<sup>d</sup>Quadratic addition of within-run errors (2 SE) and the all-session reproducibility of Harvard-91500, GJ-1 and Plesovice zircon reference materials (2 SE)

<sup>e</sup>Normalised to the Harvard 91500 reference zircon

<sup>f</sup>Common Pb correction through measured Pb<sup>204</sup> (corrected for Hg<sup>204</sup> using natural abundance Hg isotopic ratios) and the model Pb composition of Stacey & Kramers (1975))

## 14AP66

|        |                        | CONCENTRATIONS <sup>a</sup> |            |          |            |          |            | RATIOS            |                                                  |                         |                                                  |                         |                        | AGES                                              |                         |                                                  |                         |                                                  |                         |                                                   |                         |
|--------|------------------------|-----------------------------|------------|----------|------------|----------|------------|-------------------|--------------------------------------------------|-------------------------|--------------------------------------------------|-------------------------|------------------------|---------------------------------------------------|-------------------------|--------------------------------------------------|-------------------------|--------------------------------------------------|-------------------------|---------------------------------------------------|-------------------------|
| Sample | Analysis               | U [ppm]                     | 2 $\sigma$ | Th [ppm] | 2 $\sigma$ | Pb [ppm] | 2 $\sigma$ | U/Th <sup>b</sup> | <sup>207</sup> Pb/ <sup>235</sup> U <sup>b</sup> | 2 $\sigma$ <sup>d</sup> | <sup>206</sup> Pb/ <sup>238</sup> U <sup>b</sup> | 2 $\sigma$ <sup>d</sup> | $\rho$ ho <sup>c</sup> | <sup>207</sup> Pb/ <sup>206</sup> Pb <sup>c</sup> | 2 $\sigma$ <sup>d</sup> | <sup>207</sup> Pb/ <sup>235</sup> U <sup>b</sup> | 2 $\sigma$ <sup>d</sup> | <sup>206</sup> Pb/ <sup>238</sup> U <sup>b</sup> | 2 $\sigma$ <sup>d</sup> | <sup>207</sup> Pb/ <sup>206</sup> Pb <sup>c</sup> | 2 $\sigma$ <sup>d</sup> |
| 14AP66 | Zircon_Sample-144.FIN2 | 217                         | 26         | 242      | 33         | 8        | 1          | 0.9               | 0.089                                            | 0.010                   | 0.014                                            | 0.000                   | 0.569                  | 0.0477                                            | 0.0046                  | 86.4                                             | 8.8                     | 87.5                                             | 2                       | 80                                                | 190                     |
| 14AP66 | Zircon_sample-035.FIN2 | 166                         | 4          | 60       | 1          | 3        | 0          | 2.7               | 0.125                                            | 0.011                   | 0.018                                            | 0.000                   | 0.121                  | 0.0526                                            | 0.0053                  | 119.3                                            | 9.9                     | 114.2                                            | 1.4                     | 280                                               | 210                     |
| 14AP66 | Zircon_Sample-141.FIN2 | 498                         | 24         | 667      | 56         | 33       | 3          | 0.8               | 0.139                                            | 0.006                   | 0.018                                            | 0.000                   | 0.374                  | 0.0551                                            | 0.0023                  | 131.8                                            | 5.3                     | 116.2                                            | 1.9                     | 436                                               | 82                      |
| 14AP66 | Zircon_sample-009.FIN2 | 1240                        | 72         | 497      | 54         | 29       | 3          | 2.6               | 0.150                                            | 0.003                   | 0.022                                            | 0.000                   | 0.490                  | 0.0490                                            | 0.0008                  | 141.8                                            | 2.8                     | 141.9                                            | 1.9                     | 146                                               | 40                      |
| 14AP66 | Zircon_Sample-177.FIN2 | 332                         | 26         | 65       | 17         | 4        | 1          | 5.6               | 0.151                                            | 0.006                   | 0.022                                            | 0.000                   | 0.227                  | 0.0490                                            | 0.0019                  | 142.5                                            | 4.9                     | 142                                              | 1.5                     | 148                                               | 86                      |
| 14AP66 | Zircon_Sample-098.FIN2 | 329                         | 10         | 146      | 10         | 11       | 2          | 2.3               | 0.174                                            | 0.020                   | 0.023                                            | 0.000                   | 0.480                  | 0.0559                                            | 0.0066                  | 162                                              | 17                      | 145.4                                            | 2.5                     | 490                                               | 290                     |
| 14AP66 | Zircon_sample-014.FIN2 | 359                         | 9          | 25       | 4          | 2        | 1          | 15.0              | 0.172                                            | 0.007                   | 0.024                                            | 0.000                   | 0.542                  | 0.0520                                            | 0.0019                  | 160.8                                            | 6                       | 152.6                                            | 1.5                     | 278                                               | 82                      |
| 14AP66 | Zircon_Sample-202.FIN2 | 435                         | 47         | 731      | 71         | 43       | 3          | 0.6               | 0.190                                            | 0.010                   | 0.024                                            | 0.001                   | 0.581                  | 0.0577                                            | 0.0027                  | 176.1                                            | 8.3                     | 152.9                                            | 4.1                     | 510                                               | 100                     |
| 14AP66 | Zircon_Sample-091.FIN2 | 282                         | 31         | 49       | 5          | 3        | 0          | 5.8               | 0.163                                            | 0.004                   | 0.024                                            | 0.000                   | 0.162                  | 0.0491                                            | 0.0013                  | 153.1                                            | 3.3                     | 153.3                                            | 2.1                     | 152                                               | 61                      |
| 14AP66 | Zircon_Sample-086.FIN2 | 242                         | 9          | 214      | 14         | 14       | 1          | 1.1               | 0.166                                            | 0.011                   | 0.025                                            | 0.000                   | 0.425                  | 0.0475                                            | 0.0027                  | 155.5                                            | 9.4                     | 157.7                                            | 1.7                     | 120                                               | 130                     |
| 14AP66 | Zircon_Sample-088.FIN2 | 88                          | 16         | 64       | 16         | 4        | 1          | 1.4               | 0.173                                            | 0.008                   | 0.025                                            | 0.001                   | 0.496                  | 0.0513                                            | 0.0019                  | 161.9                                            | 7.1                     | 158.4                                            | 5                       | 248                                               | 83                      |
| 14AP66 | Zircon_sample-036.FIN2 | 122                         | 22         | 124      | 14         | 8        | 1          | 1.0               | 0.179                                            | 0.009                   | 0.027                                            | 0.000                   | 0.116                  | 0.0488                                            | 0.0021                  | 167.2                                            | 8.1                     | 170.9                                            | 2.7                     | 141                                               | 92                      |
| 14AP66 | Zircon_Sample-051.FIN2 | 334                         | 40         | 193      | 35         | 17       | 3          | 1.8               | 0.211                                            | 0.018                   | 0.028                                            | 0.000                   | 0.752                  | 0.0535                                            | 0.0038                  | 194                                              | 15                      | 179.8                                            | 1.8                     | 330                                               | 160                     |
| 14AP66 | Zircon_Sample-087.FIN2 | 403                         | 37         | 169      | 14         | 13       | 2          | 2.4               | 0.204                                            | 0.008                   | 0.029                                            | 0.000                   | 0.153                  | 0.0517                                            | 0.0017                  | 188.3                                            | 6.4                     | 181.81                                           | 0.99                    | 273                                               | 75                      |
| 14AP66 | Zircon_Sample-092.FIN2 | 149                         | 11         | 69       | 3          | 7        | 1          | 2.1               | 0.233                                            | 0.044                   | 0.029                                            | 0.001                   | 0.467                  | 0.0590                                            | 0.0110                  | 212                                              | 35                      | 184.3                                            | 3.2                     | 670                                               | 420                     |
| 14AP66 | Zircon_Sample-178.FIN2 | 257                         | 28         | 156      | 20         | 12       | 2          | 1.7               | 0.208                                            | 0.007                   | 0.030                                            | 0.000                   | 0.080                  | 0.0508                                            | 0.0023                  | 192.2                                            | 6.2                     | 191.3                                            | 2.8                     | 220                                               | 100                     |
| 14AP66 | Zircon_Sample-179.FIN2 | 312                         | 62         | 269      | 64         | 21       | 4          | 1.2               | 0.213                                            | 0.010                   | 0.031                                            | 0.001                   | 0.270                  | 0.0514                                            | 0.0028                  | 196.3                                            | 8.3                     | 194.8                                            | 3.4                     | 250                                               | 120                     |
| 14AP66 | Zircon_Sample-112.FIN2 | 371                         | 22         | 290      | 37         | 26       | 3          | 1.3               | 0.226                                            | 0.008                   | 0.033                                            | 0.000                   | 0.354                  | 0.0505                                            | 0.0016                  | 206.5                                            | 6.6                     | 206.2                                            | 2.8                     | 211                                               | 73                      |
| 14AP66 | Zircon_Sample-170.FIN2 | 650                         | 21         | 1000     | 110        | 89       | 10         | 0.7               | 0.242                                            | 0.007                   | 0.034                                            | 0.001                   | 0.737                  | 0.0515                                            | 0.0008                  | 221.4                                            | 5.2                     | 217.4                                            | 3.1                     | 261                                               | 37                      |
| 14AP66 | Zircon_sample-027.FIN2 | 142                         | 18         | 375      | 90         | 36       | 9          | 0.4               | 0.267                                            | 0.016                   | 0.036                                            | 0.000                   | 0.199                  | 0.0536                                            | 0.0031                  | 240                                              | 13                      | 228.8                                            | 2.9                     | 340                                               | 120                     |
| 14AP66 | Zircon_Sample-048.FIN2 | 167                         | 8          | 46       | 2          | 5        | 0          | 3.6               | 0.297                                            | 0.014                   | 0.038                                            | 0.001                   | 0.491                  | 0.0566                                            | 0.0024                  | 264                                              | 11                      | 239.7                                            | 3.2                     | 469                                               | 96                      |
| 14AP66 | Zircon_Sample-168.FIN2 | 367                         | 15         | 610      | 21         | 63       | 2          | 0.6               | 0.295                                            | 0.013                   | 0.039                                            | 0.000                   | 0.357                  | 0.0546                                            | 0.0025                  | 262                                              | 10                      | 247.9                                            | 1.5                     | 390                                               | 99                      |
| 14AP66 | Zircon_Sample-074.FIN2 | 175                         | 10         | 243      | 21         | 25       | 2          | 0.8               | 0.301                                            | 0.006                   | 0.042                                            | 0.000                   | 0.196                  | 0.0516                                            | 0.0011                  | 267.2                                            | 4.5                     | 268.1                                            | 2.9                     | 265                                               | 51                      |
| 14AP66 | Zircon_Sample-073.FIN2 | 500                         | 120        | 510      | 120        | 54       | 12         | 1.4               | 0.309                                            | 0.006                   | 0.043                                            | 0.000                   | 0.195                  | 0.0525                                            | 0.0011                  | 273                                              | 4.7                     | 269.6                                            | 3                       | 303                                               | 48                      |
| 14AP66 | Zircon_Sample-113.FIN2 | 334                         | 43         | 314      | 32         | 35       | 3          | 1.1               | 0.297                                            | 0.008                   | 0.043                                            | 0.001                   | 0.563                  | 0.0509                                            | 0.0015                  | 264.3                                            | 6.4                     | 269.8                                            | 3.1                     | 235                                               | 67                      |
| 14AP66 | Zircon_Sample-062.FIN2 | 80                          | 4          | 224      | 14         | 25       | 1          | 0.4               | 0.319                                            | 0.021                   | 0.043                                            | 0.001                   | 0.517                  | 0.0541                                            | 0.0034                  | 281                                              | 16                      | 272.7                                            | 3.1                     | 350                                               | 140                     |
| 14AP66 | Zircon_Sample-090.FIN2 | 622                         | 25         | 539      | 93         | 61       | 10         | 1.3               | 0.311                                            | 0.006                   | 0.043                                            | 0.000                   | 0.210                  | 0.0519                                            | 0.0011                  | 275.1                                            | 5                       | 274.4                                            | 2.3                     | 277                                               | 49                      |
| 14AP66 | Zircon_Sample-138.FIN2 | 414                         | 29         | 281      | 13         | 33       | 1          | 1.5               | 0.344                                            | 0.007                   | 0.046                                            | 0.000                   | 0.221                  | 0.0538                                            | 0.0016                  | 299.9                                            | 5.4                     | 287.8                                            | 2.9                     | 357                                               | 69                      |
| 14AP66 | Zircon_Sample-154.FIN2 | 154                         | 14         | 188      | 22         | 22       | 2          | 0.8               | 0.338                                            | 0.018                   | 0.046                                            | 0.001                   | 0.283                  | 0.0535                                            | 0.0028                  | 296                                              | 14                      | 287.9                                            | 3.1                     | 330                                               | 120                     |
| 14AP66 | Zircon_sample-007.FIN2 | 254                         | 11         | 224      | 12         | 27       | 1          | 1.1               | 0.330                                            | 0.012                   | 0.046                                            | 0.000                   | 0.136                  | 0.0522                                            | 0.0018                  | 289.4                                            | 9.3                     | 288                                              | 2.5                     | 314                                               | 90                      |
| 14AP66 | Zircon_sample-023.FIN2 | 151                         | 5          | 253      | 24         | 30       | 3          | 0.6               | 0.323                                            | 0.004                   | 0.046                                            | 0.001                   | 0.723                  | 0.0517                                            | 0.0016                  | 284.2                                            | 3.4                     | 289.3                                            | 6.6                     | 267                                               | 70                      |
| 14AP66 | Zircon_Sample-065.FIN2 | 540                         | 16         | 34       | 2          | 5        | 1          | 16.1              | 0.341                                            | 0.014                   | 0.046                                            | 0.001                   | 0.804                  | 0.0553                                            | 0.0030                  | 298                                              | 10                      | 289.9                                            | 7.3                     | 420                                               | 110                     |
| 14AP66 | Zircon_Sample-115.FIN2 | 229                         | 23         | 274      | 18         | 33       | 2          | 0.8               | 0.339                                            | 0.011                   | 0.046                                            | 0.000                   | 0.281                  | 0.0519                                            | 0.0015                  | 296.7                                            | 8.5                     | 291.2                                            | 2.7                     | 276                                               | 66                      |
| 14AP66 | Zircon_Sample-167.FIN2 | 307                         | 19         | 192      | 14         | 22       | 2          | 1.6               | 0.346                                            | 0.006                   | 0.047                                            | 0.000                   | 0.140                  | 0.0540                                            | 0.0009                  | 301.8                                            | 4.7                     | 297.2                                            | 2.2                     | 370                                               | 37                      |
| 14AP66 | Zircon_Sample-194.FIN2 | 242                         | 10         | 175      | 9          | 20       | 1          | 1.4               | 0.352                                            | 0.016                   | 0.047                                            | 0.000                   | 0.204                  | 0.0541                                            | 0.0024                  | 306                                              | 12                      | 299                                              | 2.9                     | 360                                               | 100                     |
| 14AP66 | Zircon_sample-046.FIN2 | 271                         | 26         | 276      | 30         | 37       | 4          | 0.9               | 0.358                                            | 0.021                   | 0.048                                            | 0.001                   | 0.458                  | 0.0541                                            | 0.0026                  | 310                                              | 16                      | 303.5                                            | 7.2                     | 370                                               | 110                     |
| 14AP66 | Zircon_Sample-209.FIN2 | 1090                        | 160        | 1100     | 230        | 128      | 20         | 0.9               | 0.408                                            | 0.015                   | 0.051                                            | 0.000                   | 0.583                  | 0.0576                                            | 0.0020                  | 347                                              | 11                      | 323.5                                            | 2.6                     | 510                                               | 77                      |
| 14AP66 | Zircon_Sample-124.FIN2 | 136                         | 25         | 113      | 20         | 15       | 2          | 1.2               | 0.405                                            | 0.018                   | 0.055                                            | 0.001                   | 0.071                  | 0.0544                                            | 0.0017                  | 350                                              | 10                      | 346.4                                            | 3.2                     | 384                                               | 71                      |
| 14AP66 | Zircon_Sample-169.FIN2 | 156                         | 19         | 144      | 19         | 21       | 3          | 1.2               | 0.447                                            | 0.016                   | 0.059                                            | 0.001                   | 0.560                  | 0.0544                                            | 0.0017                  | 375                                              | 11                      | 371.7                                            | 4.7                     | 382                                               | 69                      |
| 14AP66 | Zircon_sample-026.FIN2 | 446                         | 67         | 203      | 31         | 32       | 5          | 2.2               | 0.433                                            | 0.013                   | 0.059                                            | 0.001                   | 0.426                  | 0.0532                                            | 0.0013                  | 365.4                                            | 9                       | 372                                              | 4.1                     | 336                                               | 57                      |
| 14AP66 | Zircon_Sample-111.FIN2 | 1184                        | 46         | 301      | 11         | 44       | 2          | 4.0               | 0.445                                            | 0.009                   | 0.060                                            | 0.001                   | 0.801                  | 0.0538                                            | 0.0009                  | 373.5                                            | 6.6                     | 377.1                                            | 4.1                     | 362                                               | 37                      |
| 14AP66 | Zircon_Sample-075.FIN2 | 535                         | 75         | 254      | 57         | 45       | 10         | 2.2               | 0.552                                            | 0.028                   | 0.070                                            | 0.001                   | 0.278                  | 0.0570                                            | 0.0026                  | 446                                              | 19                      | 438.9                                            | 4.6                     | 490                                               | 100                     |
| 14AP66 | Zircon_Sample-164.FIN2 | 279                         | 20         | 164      | 9          | 30       | 1          | 1.7               | 0.544                                            | 0.012                   | 0.071                                            | 0.001                   | 0.508                  | 0.0555                                            | 0.0012                  | 441.1                                            | 7.6                     | 444.4                                            | 3.4                     | 429                                               | 48                      |
| 14AP66 | Zircon_sample-024.FIN2 | 133                         | 7          | 91       | 10         | 18       | 2          | 1.5               | 0.574                                            | 0.024                   | 0.074                                            | 0.001                   | 0.419                  | 0.0564                                            | 0.0024                  | 460                                              | 15                      | 462.1                                            | 8.4                     | 458                                               | 93                      |
| 14AP66 | Zircon_Sample-076.FIN2 | 308                         | 47         | 140      | 27         | 28       | 5          | 2.3               | 0.612                                            | 0.013                   | 0.081                                            | 0.001                   | 0.016                  | 0.0559                                            | 0.0018                  | 484.5                                            | 8.4                     | 500.2                                            | 6.8                     | 444                                               | 71                      |
| 14AP66 | Zircon_Sample-064.FIN2 | 69                          | 4          | 35       | 6          | 8        | 1          | 1.9               | 0.636                                            | 0.026                   | 0.081                                            | 0.001                   | 0.574                  | 0.0574                                            | 0.0019                  | 499                                              | 16                      | 501.6                                            | 5.9                     | 522                                               | 62                      |
| 14AP66 | Zircon_Sample-128.FIN2 | 231                         | 53         | 196      | 43         | 40       | 8          | 1.2               | 0.670                                            | 0.018                   | 0.083                                            | 0.001                   | 0.273                  | 0.0593                                            | 0.0015                  | 520                                              | 11                      | 515.4                                            | 7.2                     | 574                                               | 55                      |
| 14AP66 | Zircon_Sample-105.FIN2 | 123                         | 10         | 342      | 53         | 77       | 11         | 0.4               | 0.705                                            | 0.035                   | 0.085                                            | 0.001                   | 0.219                  | 0.0596                                            | 0.0029                  | 541                                              | 21                      | 528.3                                            | 5.6                     | 580                                               | 100                     |
| 14AP66 | Zircon_Sample-103.FIN2 | 62                          | 3          | 83       | 6          | 20       | 1          | 0.8               | 0.752                                            | 0.021                   | 0.091                                            | 0.001                   | 0.142                  | 0.0593                                            | 0.0020                  | 569                                              | 12                      | 561.7                                            | 8                       | 571                                               | 75                      |
| 14AP66 | Zircon_sample-021.FIN2 | 236                         | 29         | 219      | 36         | 63       | 9          | 1.1               | 0.936                                            | 0.017                   | 0.108                                            | 0.002                   | 0.805                  | 0.0629                                            | 0.0008                  | 670.7                                            | 8.8                     | 660                                              | 11                      | 704                                               | 19                      |
| 14AP66 | Zircon_Sample-125.FIN2 | 122                         | 11         | 137      | 17         | 42       | 5          | 0.9               | 1.138                                            | 0.028                   | 0.127                                            | 0.002                   | 0.535                  | 0.0671                                            | 0.0017                  | 771                                              | 13                      | 770                                              | 13                      | 838                                               | 54                      |
| 14AP66 | Zircon_Sample-156.FIN2 | 653                         | 35         | 242      | 10         | 135      | 7          | 2.6               | 3.020                                            | 0.130                   | 0.206                                            | 0.007                   | 0.950                  | 0.1056                                            | 0.0012                  | 1412                                             | 33                      | 1205                                             | 39                      | 1725                                              | 21                      |
| 14AP66 | Zircon_Sample-166.FIN2 | 186                         | 26         | 134      | 21         | 78       | 12         | 1.4               | 2.960                                            | 0.130                   | 0.214                                            | 0.007                   | 0.980                  | 0.1007                                            | 0.0017                  | 1396                                             | 34                      | 1250                                             | 38                      | 1636                                              | 32                      |
| 14AP66 | Zircon_Sample-204.FIN2 | 102                         | 10         | 55       | 8          | 29       | 4          | 1.9               | 2.693                                            | 0.056                   | 0.225                                            | 0.003                   | 0.481                  | 0.0876                                            | 0.0015                  | 1326                                             | 15                      | 1305                                             | 17                      | 1373                                              | 32                      |
| 14AP66 | Zircon_Sample-117.FIN2 | 414                         | 53         | 210      | 52         | 102      | 12         | 1.9               | 3.820                                            | 0.400                   | 0.238                                            | 0.023                   | 0.997                  | 0.1165                                            | 0.0012                  | 1591                                             | 87                      | 1380                                             | 120                     | 1903                                              | 19                      |
| 14AP66 | Zircon_Sample-102.FIN2 | 262                         | 20         | 120      | 9          | 76       | 4          | 2.2               | 3.249                                            | 0.085                   | 0.253                                            | 0.005                   | 0.928                  | 0.0934                                            | 0.0010                  | 1468                                             | 20                      | 1453                                             | 27                      | 1495                                              | 21                      |
| 14AP66 | Zircon_Sample-205.FIN2 | 638                         | 40         | 16       | 1          | 10       | 1          | 36.9              | 4.352                                            | 0.053                   | 0.280                                            | 0.004                   | 0.885                  | 0.1130                                            | 0.0008                  | 1703                                             | 10                      | 1590                                             | 18                      | 1849                                              | 12                      |
| 14AP66 | Zircon_Sample-063.FIN2 | 102                         | 4          | 117      | 11         | 83       | 4          | 0.9               | 4.238                                            | 0.075                   | 0.280                                            | 0.006                   | 0.811                  | 0.1104                                            | 0.0016                  | 1681                                             | 15                      | 1593                                             | 31                      | 1804                                              | 26                      |
| 14AP66 | Zircon_Sample-066.FIN2 | 11                          |            |          |            |          |            |                   |                                                  |                         |                                                  |                         |                        |                                                   |                         |                                                  |                         |                                                  |                         |                                                   |                         |

|                                  |                        |     |    |     |    |     |    |      |        |       |       |       |       |        |        |        |     |      |     |        |     |
|----------------------------------|------------------------|-----|----|-----|----|-----|----|------|--------|-------|-------|-------|-------|--------|--------|--------|-----|------|-----|--------|-----|
| 14AP66                           | Zircon_sample-010.FIN2 | 275 | 45 | 149 | 26 | 124 | 17 | 1.9  | 5.446  | 0.094 | 0.347 | 0.007 | 0.824 | 0.1146 | 0.0012 | 1892   | 15  | 1922 | 31  | 1873   | 19  |
| 14AP66                           | Zircon_sample-008.FIN2 | 79  | 2  | 82  | 3  | 70  | 3  | 1.0  | 5.830  | 0.130 | 0.356 | 0.007 | 0.861 | 0.1195 | 0.0013 | 1954   | 20  | 1965 | 35  | 1948   | 20  |
| 14AP66                           | Zircon_Sample-072.FIN2 | 172 | 24 | 72  | 3  | 48  | 2  | 2.4  | 5.640  | 0.230 | 0.359 | 0.010 | 0.937 | 0.1134 | 0.0014 | 1921   | 35  | 1977 | 47  | 1854   | 22  |
| 14AP66                           | Zircon_sample-025.FIN2 | 330 | 19 | 329 | 24 | 290 | 20 | 1.0  | 6.260  | 0.100 | 0.364 | 0.005 | 0.928 | 0.1250 | 0.0007 | 2013   | 14  | 2001 | 26  | 2028.5 | 9.7 |
| 14AP66                           | Zircon_Sample-176.FIN2 | 156 | 32 | 120 | 6  | 97  | 5  | 1.4  | 6.360  | 0.150 | 0.372 | 0.007 | 0.934 | 0.1236 | 0.0010 | 2026   | 21  | 2040 | 34  | 2008   | 15  |
| 14AP66                           | Zircon_Sample-139.FIN2 | 661 | 59 | 212 | 34 | 184 | 23 | 3.2  | 8.170  | 0.150 | 0.383 | 0.008 | 0.826 | 0.1555 | 0.0023 | 2250   | 16  | 2089 | 37  | 2406   | 25  |
| 14AP66                           | Zircon_Sample-189.FIN2 | 177 | 24 | 185 | 21 | 163 | 15 | 1.0  | 9.650  | 0.240 | 0.394 | 0.007 | 0.920 | 0.1788 | 0.0015 | 2402   | 23  | 2139 | 32  | 2642   | 14  |
| 14AP66                           | Zircon_Sample-152.FIN2 | 67  | 13 | 80  | 8  | 73  | 5  | 0.9  | 8.578  | 0.095 | 0.396 | 0.006 | 0.654 | 0.1563 | 0.0016 | 2294   | 10  | 2150 | 25  | 2415   | 18  |
| 14AP66                           | Zircon_sample-011.FIN2 | 58  | 5  | 74  | 19 | 74  | 16 | 1.3  | 8.590  | 0.400 | 0.407 | 0.009 | 0.831 | 0.1551 | 0.0046 | 2303   | 40  | 2200 | 39  | 2399   | 51  |
| 14AP66                           | Zircon_Sample-165.FIN2 | 124 | 6  | 48  | 6  | 46  | 6  | 2.7  | 11.050 | 0.210 | 0.423 | 0.006 | 0.657 | 0.1916 | 0.0018 | 2527   | 18  | 2272 | 27  | 2756   | 15  |
| 14AP66                           | Zircon_Sample-118.FIN2 | 131 | 10 | 73  | 6  | 74  | 5  | 1.8  | 10.580 | 0.190 | 0.428 | 0.004 | 0.872 | 0.1791 | 0.0015 | 2490   | 15  | 2296 | 19  | 2644   | 14  |
| 14AP66                           | Zircon_Sample-049.FIN2 | 104 | 6  | 108 | 4  | 111 | 7  | 0.9  | 8.650  | 0.130 | 0.432 | 0.008 | 0.830 | 0.1460 | 0.0019 | 2302   | 14  | 2314 | 37  | 2299   | 23  |
| 14AP66                           | Zircon_Sample-155.FIN2 | 113 | 5  | 143 | 14 | 143 | 12 | 0.8  | 10.710 | 0.230 | 0.446 | 0.008 | 0.939 | 0.1745 | 0.0016 | 2498   | 20  | 2376 | 36  | 2601   | 15  |
| 14AP66                           | Zircon_Sample-207.FIN2 | 211 | 9  | 139 | 9  | 131 | 6  | 1.5  | 11.690 | 0.420 | 0.460 | 0.015 | 0.987 | 0.1846 | 0.0013 | 2578   | 35  | 2437 | 68  | 2694   | 12  |
| 14AP66                           | Zircon_Sample-153.FIN2 | 59  | 3  | 99  | 7  | 109 | 6  | 0.6  | 11.150 | 0.300 | 0.461 | 0.013 | 0.586 | 0.1757 | 0.0033 | 2535   | 25  | 2442 | 58  | 2612   | 31  |
| 14AP66                           | Zircon_Sample-059.FIN2 | 257 | 27 | 95  | 11 | 113 | 14 | 2.6  | 11.650 | 0.140 | 0.466 | 0.007 | 0.692 | 0.1812 | 0.0020 | 2576   | 11  | 2467 | 29  | 2663   | 19  |
| 14AP66                           | Zircon_Sample-061.FIN2 | 59  | 2  | 102 | 2  | 111 | 3  | 0.6  | 11.700 | 0.160 | 0.468 | 0.006 | 0.833 | 0.1817 | 0.0017 | 2581   | 13  | 2474 | 26  | 2668   | 16  |
| 14AP66                           | Zircon_sample-034.FIN2 | 178 | 63 | 92  | 18 | 105 | 14 | 1.7  | 11.260 | 0.320 | 0.475 | 0.012 | 0.942 | 0.1739 | 0.0018 | 2543   | 27  | 2503 | 54  | 2595   | 17  |
| 14AP66                           | Zircon_Sample-085.FIN2 | 68  | 6  | 60  | 5  | 65  | 5  | 1.2  | 11.540 | 0.220 | 0.485 | 0.009 | 0.931 | 0.1730 | 0.0018 | 2567   | 17  | 2550 | 37  | 2587   | 17  |
| 14AP66                           | Zircon_sample-013.FIN2 | 151 | 13 | 9   | 1  | 10  | 1  | 16.6 | 12.650 | 0.160 | 0.497 | 0.006 | 0.908 | 0.1864 | 0.0017 | 2658   | 14  | 2602 | 27  | 2710   | 15  |
| 14AP66                           | Zircon_Sample-104.FIN2 | 172 | 6  | 149 | 4  | 164 | 5  | 1.2  | 15.360 | 0.230 | 0.500 | 0.011 | 0.951 | 0.2219 | 0.0021 | 2838   | 14  | 2614 | 47  | 2994   | 15  |
| 14AP66                           | Zircon_Sample-180.FIN2 | 72  | 15 | 57  | 11 | 59  | 10 | 1.3  | 12.230 | 0.240 | 0.503 | 0.008 | 0.847 | 0.1772 | 0.0016 | 2622   | 18  | 2625 | 34  | 2627   | 15  |
| 14AP66                           | Zircon_Sample-129.FIN2 | 54  | 5  | 95  | 7  | 102 | 10 | 0.6  | 13.030 | 0.180 | 0.510 | 0.005 | 0.837 | 0.1873 | 0.0015 | 2682   | 13  | 2656 | 21  | 2719   | 13  |
| 14AP66                           | Zircon_sample-038.FIN2 | 147 | 11 | 71  | 4  | 89  | 3  | 2.0  | 12.930 | 0.140 | 0.513 | 0.006 | 0.527 | 0.1831 | 0.0020 | 2675   | 10  | 2667 | 24  | 2681   | 18  |
| 14AP66                           | Zircon_Sample-130.FIN2 | 183 | 16 | 140 | 18 | 164 | 19 | 1.3  | 12.890 | 0.240 | 0.513 | 0.010 | 0.931 | 0.1830 | 0.0009 | 2671   | 18  | 2669 | 43  | 2680.4 | 7.7 |
| 14AP66                           | Zircon_Sample-101.FIN2 | 162 | 4  | 153 | 11 | 181 | 14 | 1.1  | 14.550 | 0.190 | 0.531 | 0.005 | 0.849 | 0.1999 | 0.0015 | 2786   | 13  | 2746 | 21  | 2825   | 12  |
| 14AP66                           | Zircon_sample-037.FIN2 | 464 | 19 | 438 | 64 | 580 | 78 | 1.1  | 17.080 | 0.210 | 0.535 | 0.009 | 0.820 | 0.2339 | 0.0023 | 2939   | 12  | 2764 | 36  | 3079   | 16  |
| 14AP66                           | Zircon_Sample-196.FIN2 | 242 | 15 | 321 | 44 | 363 | 44 | 0.8  | 15.240 | 0.160 | 0.541 | 0.008 | 0.722 | 0.2047 | 0.0016 | 2830.1 | 9.9 | 2787 | 33  | 2864   | 13  |
| 14AP66                           | Zircon_Sample-193.FIN2 | 136 | 7  | 80  | 6  | 98  | 7  | 1.7  | 16.390 | 0.490 | 0.545 | 0.011 | 0.962 | 0.2177 | 0.0029 | 2899   | 29  | 2803 | 45  | 2963   | 22  |
| 14AP66                           | Zircon_Sample-151.FIN2 | 226 | 64 | 106 | 31 | 147 | 39 | 1.9  | 14.920 | 0.690 | 0.550 | 0.019 | 0.952 | 0.1966 | 0.0034 | 2807   | 45  | 2850 | 67  | 2797   | 29  |
| 14AP66                           | Zircon_sample-012.FIN2 | 144 | 8  | 112 | 6  | 182 | 5  | 1.3  | 34.920 | 0.390 | 0.756 | 0.009 | 0.848 | 0.3359 | 0.0033 | 3636   | 11  | 3630 | 32  | 3644   | 15  |
| Common-Pb corrected <sup>d</sup> |                        |     |    |     |    |     |    |      |        |       |       |       |       |        |        |        |     |      |     |        |     |
| 14AP66                           | Zircon_Sample-047.FIN2 | 321 | 30 | 411 | 83 | 65  | 14 | 0.8  | 0.192  | 0.079 | 0.045 | 0.001 | 0.597 | 0.0300 | 0.0130 | 174    | 70  | 286  | 3.9 | 460    | 460 |
| 14AP66                           | Zircon_Sample-183.FIN2 | 428 | 65 | 450 | 29 | 128 | 18 | 1.0  | 0.966  | 0.082 | 0.113 | 0.001 | 0.258 | 0.0624 | 0.0052 | 685    | 42  | 687  | 8.3 | 670    | 180 |
| 14AP66                           | Zircon_Sample-131.FIN2 | 284 | 31 | 103 | 26 | 83  | 9  | 3.6  | 4.290  | 0.420 | 0.272 | 0.023 | 0.994 | 0.1138 | 0.0023 | 1682   | 86  | 1550 | 120 | 1860   | 36  |
| 14AP66                           | Zircon_Sample-195.FIN2 | 476 | 44 | 116 | 8  | 95  | 8  | 3.9  | 6.749  | 0.060 | 0.369 | 0.004 | 0.883 | 0.1331 | 0.0007 | 2078.9 | 7.9 | 2025 | 19  | 2139.3 | 8.8 |
| 14AP66                           | Zircon_Sample-143.FIN2 | 158 | 7  | 205 | 33 | 215 | 28 | 0.8  | 10.380 | 0.180 | 0.419 | 0.005 | 0.819 | 0.1809 | 0.0014 | 2469   | 16  | 2257 | 21  | 2661   | 13  |

<sup>a</sup>U, Th and Pb concentrations with errors (2SE) and U/Th ratios are calculated relative to the Harvard 91500 reference zircon

<sup>b</sup>Corrected for background, downhole and within-run Pb/U fractionation. Normalised to the reference zircon Harvard 91500 (TIMS/measured values). The <sup>207</sup>Pb/<sup>235</sup>U is calculated through: (<sup>207</sup>Pb/<sup>206</sup>Pb)/((<sup>238</sup>U/<sup>206</sup>Pb \* 1/137.88)

<sup>c</sup>Rho is the error correlation defined as the quotient of the propagated errors of the <sup>206</sup>Pb/<sup>238</sup>U and <sup>207</sup>Pb/<sup>235</sup>U ratios

<sup>d</sup>Quadratic addition of within-run errors (2 SE) and the all-session reproducibility of Harvard-91500, GJ-1 and Plesovice zircon reference materials (2 SE)

<sup>e</sup>Normalised to the Harvard 91500 reference zircon

<sup>f</sup>Common Pb correction through measured Pb<sup>204</sup> (corrected for Hg<sup>204</sup> using natural abundance Hg isotopic ratios) and the model Pb composition of Stacey & Kramers (1975))
